# Supplementary material
Source: publisher figshare collection journal article supplement (https://acs.figshare.com/ndownloader/files/4424158)
Supplement: Supplementary file 1 [file 4424158]

 
data_nag7 
 
_audit_creation_method            SHELXL-97 
_chemical_name_systematic 
; 
 Boc-(Leu-Leu-Ac5c[OMe])2-OMe 
; 
_chemical_name_common             ? 
_chemical_melting_point           209 
_chemical_formula_moiety          'C44 H78 N6 O11 ' 
_chemical_formula_sum 
 'C44 H78 N6 O11' 
_chemical_formula_weight          867.12 

_chemical_compound_source         synthesis
_chemical_absolute_configuration  rm 
 
loop_ 
 _atom_type_symbol 
 _atom_type_description 
 _atom_type_scat_dispersion_real 
 _atom_type_scat_dispersion_imag 
 _atom_type_scat_source 
 'C'  'C'   0.0033   0.0016 
 'International Tables Vol C Tables 4.2.6.8 and 6.1.1.4' 
 'H'  'H'   0.0000   0.0000 
 'International Tables Vol C Tables 4.2.6.8 and 6.1.1.4' 
 'N'  'N'   0.0061   0.0033 
 'International Tables Vol C Tables 4.2.6.8 and 6.1.1.4' 
 'O'  'O'   0.0106   0.0060 
 'International Tables Vol C Tables 4.2.6.8 and 6.1.1.4' 
 
_symmetry_cell_setting           'Trigonal'
_symmetry_space_group_name_H-M   'P3(2)   '
_symmetry_space_group_name_Hall  'P 32' 
loop_ 
 _symmetry_equiv_pos_as_xyz 
 'x, y, z' 
 '-y, x-y, z+1/3' 
 '-x+y, -x, z+2/3' 
 
_cell_length_a                    21.328(3) 
_cell_length_b                    21.328(3) 
_cell_length_c                    29.108(6) 
_cell_angle_alpha                 90.00 
_cell_angle_beta                  90.00 
_cell_angle_gamma                 120.00 
_cell_volume                      11467(3) 
_cell_formula_units_Z             9 
_cell_measurement_temperature     293(2) 
_cell_measurement_reflns_used     73389 
_cell_measurement_theta_min       3.0 
_cell_measurement_theta_max       27.5 
 
_exptl_crystal_description        'block' 
_exptl_crystal_colour             'colorless' 
_exptl_crystal_size_max           0.70 
_exptl_crystal_size_mid           0.30 
_exptl_crystal_size_min           0.30 
_exptl_crystal_density_meas       ? 
_exptl_crystal_density_diffrn     1.130 
_exptl_crystal_density_method     'not measured' 
_exptl_crystal_F_000              4248 
_exptl_absorpt_coefficient_mu     0.081 
_exptl_absorpt_correction_type    none
_exptl_absorpt_correction_T_min   ? 
_exptl_absorpt_correction_T_max   ? 
_exptl_absorpt_process_details    ? 
 
_exptl_special_details 
; 
 ? 
; 
 
_diffrn_ambient_temperature       293(2) 
_diffrn_radiation_wavelength      0.71073 
_diffrn_radiation_type            MoK\a 
_diffrn_radiation_source          'fine-focus sealed tube' 
_diffrn_radiation_monochromator   graphite 
_diffrn_measurement_device_type   'RIGAKU RAXIS-RAPID' 
_diffrn_measurement_method        \w 
_diffrn_detector_area_resol_mean  10.00 
_diffrn_standards_number          ? 
_diffrn_standards_interval_count  ? 
_diffrn_standards_interval_time   ? 
_diffrn_standards_decay_%         ? 
_diffrn_reflns_number             87127 
_diffrn_reflns_av_R_equivalents   0.0396 
_diffrn_reflns_av_sigmaI/netI     0.0261 
_diffrn_reflns_limit_h_min        -25 
_diffrn_reflns_limit_h_max        25 
_diffrn_reflns_limit_k_min        -25 
_diffrn_reflns_limit_k_max        24 
_diffrn_reflns_limit_l_min        -34 
_diffrn_reflns_limit_l_max        34 
_diffrn_reflns_theta_min          3.00 
_diffrn_reflns_theta_max          24.71 
_reflns_number_total              13014 
_reflns_number_gt                 11176 
_reflns_threshold_expression      I>2\s(I) 
 
_computing_data_collection        'RIGAKU Software' 
_computing_cell_refinement        'RIGAKU Software'  
_computing_data_reduction         'RIGAKU Software'  
_computing_structure_solution     'SHELXD (Seldrick & Gould, 1996)'
_computing_structure_refinement   'SHELXL-97 (Sheldrick, 1997)' 
_computing_molecular_graphics     ? 
_computing_publication_material   ? 
 
_refine_special_details 
; 
 Refinement of F^2^ against ALL reflections.  The weighted R-factor wR and 
 goodness of fit S are based on F^2^, conventional R-factors R are based 
 on F, with F set to zero for negative F^2^. The threshold expression of 
 F^2^ > 2sigma(F^2^) is used only for calculating R-factors(gt) etc. and is 
 not relevant to the choice of reflections for refinement.  R-factors based 
 on F^2^ are statistically about twice as large as those based on F, and R- 
 factors based on ALL data will be even larger. 
; 
 
_refine_ls_structure_factor_coef  Fsqd  
_refine_ls_matrix_type            fullcycle 
_refine_ls_weighting_scheme       calc  
_refine_ls_weighting_details 
 'calc w=1/[\s^2^(Fo^2^)+(0.1944P)^2^+8.5070P] where P=(Fo^2^+2Fc^2^)/3' 
_atom_sites_solution_primary      direct 
_atom_sites_solution_secondary    difmap 
_atom_sites_solution_hydrogens    geom 
_refine_ls_hydrogen_treatment     constr 
_refine_ls_extinction_method      none 
_refine_ls_extinction_coef        ? 
_refine_ls_abs_structure_details 
 'Flack H D (1983), Acta Cryst. A39, 876-881' 
_refine_ls_abs_structure_Flack    -1.3(15) 
_refine_ls_number_reflns          13014 
_refine_ls_number_parameters      1648 
_refine_ls_number_restraints      165 
_refine_ls_R_factor_all           0.1047 
_refine_ls_R_factor_gt            0.0951 
_refine_ls_wR_factor_ref          0.2788 
_refine_ls_wR_factor_gt           0.2649 
_refine_ls_goodness_of_fit_ref    1.059 
_refine_ls_restrained_S_all       1.055 
_refine_ls_shift/su_max           0.014 
_refine_ls_shift/su_mean          0.002 
 
loop_ 
 _atom_site_label 
 _atom_site_type_symbol 
 _atom_site_fract_x 
 _atom_site_fract_y 
 _atom_site_fract_z 
 _atom_site_U_iso_or_equiv 
 _atom_site_adp_type 
 _atom_site_occupancy 
 _atom_site_symmetry_multiplicity 
 _atom_site_calc_flag 
 _atom_site_refinement_flags 
 _atom_site_disorder_assembly 
 _atom_site_disorder_group 
O1_10 O 0.4560(3) 0.8849(3) 0.76955(15) 0.0478(10) Uani 1 1 d . . . 
C11_10 C 0.4125(4) 0.9209(4) 0.7753(2) 0.0502(15) Uani 1 1 d . . . 
C2_10 C 0.4139(6) 0.9314(6) 0.8270(3) 0.077(2) Uani 1 1 d . . . 
H2A_10 H 0.4627 0.9636 0.8368 0.115 Uiso 1 1 calc R . . 
H2B_10 H 0.3958 0.8855 0.8421 0.115 Uiso 1 1 calc R . . 
H2C_10 H 0.3840 0.9518 0.8349 0.115 Uiso 1 1 calc R . . 
C3_10 C 0.3358(4) 0.8704(5) 0.7599(3) 0.0573(17) Uani 1 1 d . . . 
H3A_10 H 0.3350 0.8635 0.7273 0.086 Uiso 1 1 calc R . . 
H3B_10 H 0.3061 0.8910 0.7675 0.086 Uiso 1 1 calc R . . 
H3C_10 H 0.3175 0.8246 0.7751 0.086 Uiso 1 1 calc R . . 
C4_10 C 0.4476(6) 0.9929(5) 0.7498(4) 0.077(2) Uani 1 1 d . . . 
H4A_10 H 0.4457 0.9843 0.7174 0.115 Uiso 1 1 calc R . . 
H4B_10 H 0.4971 1.0217 0.7593 0.115 Uiso 1 1 calc R . . 
H4C_10 H 0.4220 1.0182 0.7568 0.115 Uiso 1 1 calc R . . 
C5_10 C 0.4589(3) 0.8576(3) 0.7285(2) 0.0406(13) Uani 1 1 d . . . 
O5_10 O 0.4353(3) 0.8662(3) 0.69267(15) 0.0480(10) Uani 1 1 d . . . 
N1_11 N 0.4916(3) 0.8160(3) 0.73158(17) 0.0442(12) Uani 1 1 d . . . 
H1_11 H 0.5062 0.8091 0.7576 0.053 Uiso 1 1 calc R . . 
C1A_11 C 0.5007(3) 0.7846(3) 0.6908(2) 0.0421(13) Uani 1 1 d . . . 
H1A_11 H 0.5242 0.8229 0.6677 0.051 Uiso 1 1 calc R . . 
C2_11 C 0.5505(4) 0.7525(4) 0.7001(2) 0.0451(14) Uani 1 1 d . . . 
H2A_11 H 0.5281 0.7152 0.7234 0.054 Uiso 1 1 calc R . . 
H2B_11 H 0.5539 0.7295 0.6722 0.054 Uiso 1 1 calc R . . 
C3_11 C 0.6258(4) 0.8067(4) 0.7156(2) 0.0539(16) Uani 1 1 d . . . 
H3_11 H 0.6222 0.8284 0.7444 0.065 Uiso 1 1 calc R . . 
C4_11 C 0.6665(5) 0.8666(5) 0.6814(3) 0.0634(19) Uani 1 1 d . . . 
H4A_11 H 0.7137 0.8997 0.6933 0.095 Uiso 1 1 calc R . . 
H4B_11 H 0.6405 0.8918 0.6760 0.095 Uiso 1 1 calc R . . 
H4C_11 H 0.6713 0.8464 0.6530 0.095 Uiso 1 1 calc R . . 
C5_11 C 0.6659(5) 0.7650(5) 0.7253(3) 0.065(2) Uani 1 1 d . . . 
H5A_11 H 0.6389 0.7274 0.7473 0.098 Uiso 1 1 calc R . . 
H5B_11 H 0.7130 0.7977 0.7374 0.098 Uiso 1 1 calc R . . 
H5C_11 H 0.6706 0.7440 0.6973 0.098 Uiso 1 1 calc R . . 
C6_11 C 0.4302(3) 0.7257(3) 0.67080(19) 0.0385(12) Uani 1 1 d . . . 
O6_11 O 0.4285(2) 0.7067(2) 0.63015(14) 0.0439(9) Uani 1 1 d . . . 
N1_12 N 0.3688(3) 0.6963(3) 0.69610(17) 0.0435(11) Uani 1 1 d . . . 
H1_12 H 0.3696 0.7067 0.7247 0.052 Uiso 1 1 calc R . . 
C1A_12 C 0.3018(4) 0.6471(4) 0.6734(3) 0.0600(18) Uani 1 1 d . . . 
H1A_12 H 0.3074 0.6080 0.6601 0.072 Uiso 1 1 calc R . . 
C2_12 C 0.2358(6) 0.6123(6) 0.7062(4) 0.087(3) Uani 1 1 d . . . 
H2A_12 H 0.1915 0.5950 0.6887 0.105 Uiso 1 1 calc R . . 
H2B_12 H 0.2390 0.6481 0.7280 0.105 Uiso 1 1 calc R . . 
C3_12 C 0.2348(7) 0.5465(7) 0.7328(4) 0.094(3) Uani 1 1 d . . . 
H3_12 H 0.2689 0.5667 0.7584 0.113 Uiso 1 1 calc R . . 
C4_12 C 0.1565(7) 0.5054(8) 0.7533(6) 0.118(4) Uani 1 1 d . . . 
H4A_12 H 0.1479 0.5385 0.7709 0.177 Uiso 1 1 calc R . . 
H4B_12 H 0.1517 0.4671 0.7729 0.177 Uiso 1 1 calc R . . 
H4C_12 H 0.1218 0.4854 0.7288 0.177 Uiso 1 1 calc R . . 
C5_12 C 0.2511(9) 0.4974(7) 0.7079(5) 0.110(4) Uani 1 1 d . . . 
H5A_12 H 0.2997 0.5236 0.6964 0.165 Uiso 1 1 calc R . . 
H5B_12 H 0.2180 0.4764 0.6827 0.165 Uiso 1 1 calc R . . 
H5C_12 H 0.2463 0.4598 0.7282 0.165 Uiso 1 1 calc R . . 
C6_12 C 0.2825(4) 0.6820(5) 0.6347(3) 0.0571(18) Uani 1 1 d . . . 
O6_12 O 0.2435(3) 0.6440(4) 0.6033(2) 0.0714(15) Uani 1 1 d . . . 
N1_13 N 0.3094(4) 0.7534(4) 0.6359(2) 0.0548(14) Uani 1 1 d . . . 
H1_13 H 0.3347 0.7782 0.6591 0.066 Uiso 1 1 calc R . . 
C1A_13 C 0.2959(6) 0.7890(6) 0.5978(3) 0.072(2) Uani 1 1 d D . . 
C2_13 C 0.3316(6) 0.8702(6) 0.6071(3) 0.091(3) Uani 1 1 d DU . . 
H2A_13 H 0.3511 0.8978 0.5791 0.109 Uiso 1 1 calc R . . 
H2B_13 H 0.3702 0.8854 0.6295 0.109 Uiso 1 1 calc R . . 
C3_13 C 0.2693(7) 0.8796(8) 0.6261(4) 0.118(5) Uani 1 1 d DU . . 
H3_13 H 0.2850 0.9073 0.6548 0.142 Uiso 1 1 calc R . . 
O3_13 O 0.2474(13) 0.9171(11) 0.5938(6) 0.232(9) Uani 1 1 d DU . . 
C4_13 C 0.2012(8) 0.8059(8) 0.6356(5) 0.136(6) Uani 1 1 d DU . . 
H4A_13 H 0.2026 0.7856 0.6652 0.163 Uiso 1 1 calc R . . 
H4B_13 H 0.1566 0.8073 0.6325 0.163 Uiso 1 1 calc R . . 
C5_13 C 0.2153(8) 0.7685(9) 0.5950(4) 0.111(4) Uani 1 1 d DU . . 
H5A_13 H 0.2058 0.7850 0.5661 0.134 Uiso 1 1 calc R . . 
H5B_13 H 0.1842 0.7164 0.5970 0.134 Uiso 1 1 calc R . . 
C6_13 C 0.3214(5) 0.7736(5) 0.5520(3) 0.069(2) Uani 1 1 d . . . 
O6_13 O 0.2929(5) 0.7703(5) 0.5165(2) 0.098(2) Uani 1 1 d . . . 
C7_13 C 0.2824(13) 0.9957(11) 0.5922(9) 0.169(8) Uani 1 1 d DU . . 
H7A_13 H 0.2598 1.0097 0.5690 0.254 Uiso 1 1 calc R . . 
H7B_13 H 0.3328 1.0156 0.5850 0.254 Uiso 1 1 calc R . . 
H7C_13 H 0.2778 1.0136 0.6215 0.254 Uiso 1 1 calc R . . 
N1_14 N 0.3849(3) 0.7721(3) 0.55507(19) 0.0511(13) Uani 1 1 d . . . 
H1_14 H 0.4067 0.7806 0.5811 0.061 Uiso 1 1 calc R . . 
C1A_14 C 0.4160(4) 0.7567(4) 0.5158(2) 0.0563(17) Uani 1 1 d . . . 
H1A_14 H 0.4133 0.7838 0.4894 0.068 Uiso 1 1 calc R . . 
C2_14 C 0.4966(4) 0.7819(4) 0.5255(3) 0.0568(17) Uani 1 1 d . . . 
H2A_14 H 0.5004 0.7623 0.5548 0.068 Uiso 1 1 calc R . . 
H2B_14 H 0.5147 0.7632 0.5018 0.068 Uiso 1 1 calc R . . 
C3_14 C 0.5436(6) 0.8655(5) 0.5268(4) 0.085(3) Uani 1 1 d . . . 
H3_14 H 0.5192 0.8841 0.5464 0.102 Uiso 1 1 calc R . . 
C4_14 C 0.6167(5) 0.8872(5) 0.5480(4) 0.076(2) Uani 1 1 d . . . 
H4A_14 H 0.6456 0.9390 0.5491 0.114 Uiso 1 1 calc R . . 
H4B_14 H 0.6410 0.8683 0.5297 0.114 Uiso 1 1 calc R . . 
H4C_14 H 0.6099 0.8679 0.5785 0.114 Uiso 1 1 calc R . . 
C5_14 C 0.5511(10) 0.8979(10) 0.4777(7) 0.151(7) Uani 1 1 d . . . 
H5A_14 H 0.5039 0.8836 0.4657 0.227 Uiso 1 1 calc R . . 
H5B_14 H 0.5749 0.8803 0.4579 0.227 Uiso 1 1 calc R . . 
H5C_14 H 0.5791 0.9497 0.4793 0.227 Uiso 1 1 calc R . . 
C6_14 C 0.3791(4) 0.6774(4) 0.5032(2) 0.0446(14) Uani 1 1 d . . . 
O6_14 O 0.3685(3) 0.6571(3) 0.46327(15) 0.0527(11) Uani 1 1 d . . . 
N1_15 N 0.3582(3) 0.6295(3) 0.53754(16) 0.0387(10) Uani 1 1 d . . . 
H1_15 H 0.3674 0.6444 0.5655 0.046 Uiso 1 1 calc R . . 
C1A_15 C 0.3198(3) 0.5522(3) 0.5278(2) 0.0372(12) Uani 1 1 d . . . 
H1A_15 H 0.3498 0.5421 0.5069 0.045 Uiso 1 1 calc R . . 
C2_15 C 0.3092(4) 0.5089(3) 0.5729(2) 0.0444(13) Uani 1 1 d . . . 
H2A_15 H 0.3556 0.5277 0.5881 0.053 Uiso 1 1 calc R . . 
H2B_15 H 0.2775 0.5164 0.5932 0.053 Uiso 1 1 calc R . . 
C3_15 C 0.2770(4) 0.4274(4) 0.5652(2) 0.0460(14) Uani 1 1 d . . . 
H3_15 H 0.2325 0.4097 0.5471 0.055 Uiso 1 1 calc R . . 
C4_15 C 0.2573(5) 0.3882(5) 0.6120(3) 0.069(2) Uani 1 1 d . . . 
H4A_15 H 0.2241 0.3986 0.6279 0.103 Uiso 1 1 calc R . . 
H4B_15 H 0.3005 0.4048 0.6301 0.103 Uiso 1 1 calc R . . 
H4C_15 H 0.2352 0.3370 0.6072 0.103 Uiso 1 1 calc R . . 
C5_15 C 0.3285(5) 0.4118(5) 0.5389(3) 0.0604(18) Uani 1 1 d . . . 
H5A_15 H 0.3068 0.3606 0.5342 0.091 Uiso 1 1 calc R . . 
H5B_15 H 0.3726 0.4291 0.5560 0.091 Uiso 1 1 calc R . . 
H5C_15 H 0.3390 0.4358 0.5096 0.091 Uiso 1 1 calc R . . 
C6_15 C 0.2479(3) 0.5277(3) 0.50478(19) 0.0405(13) Uani 1 1 d . . . 
O6_15 O 0.2254(2) 0.4803(2) 0.47403(14) 0.0437(9) Uani 1 1 d . . . 
N1_16 N 0.2086(3) 0.5561(3) 0.52037(19) 0.0472(12) Uani 1 1 d . . . 
H1_16 H 0.2262 0.5890 0.5413 0.057 Uiso 1 1 calc R . . 
C1A_16 C 0.1358(4) 0.5319(4) 0.5024(2) 0.0506(15) Uani 1 1 d D . . 
C2_16 C 0.1412(6) 0.5573(6) 0.4510(3) 0.075(2) Uani 1 1 d D . . 
H2A_16 H 0.1906 0.5789 0.4399 0.090 Uiso 1 1 calc R . . 
H2B_16 H 0.1101 0.5167 0.4313 0.090 Uiso 1 1 calc R . . 
C3_16 C 0.1158(9) 0.6137(9) 0.4516(6) 0.124(5) Uani 1 1 d DU . . 
H3_16 H 0.1538 0.6558 0.4353 0.149 Uiso 1 1 calc R . . 
O3_16 O 0.0516(10) 0.5886(10) 0.4234(7) 0.222(8) Uani 1 1 d DU . . 
C4_16 C 0.1227(18) 0.6379(9) 0.5021(5) 0.224(13) Uani 1 1 d DU . . 
H4A_16 H 0.0902 0.6563 0.5086 0.268 Uiso 1 1 calc R . . 
H4B_16 H 0.1719 0.6753 0.5090 0.268 Uiso 1 1 calc R . . 
C5_16 C 0.1016(5) 0.5689(6) 0.5304(4) 0.078(3) Uani 1 1 d D . . 
H5A_16 H 0.0494 0.5383 0.5324 0.094 Uiso 1 1 calc R . . 
H5B_16 H 0.1216 0.5808 0.5612 0.094 Uiso 1 1 calc R . . 
C6_16 C 0.0880(4) 0.4518(4) 0.5080(2) 0.0506(15) Uani 1 1 d . . . 
O6_16 O 0.0394(3) 0.4123(4) 0.4817(2) 0.0720(15) Uani 1 1 d . . . 
C7_16 C 0.0418(15) 0.6462(14) 0.4054(10) 0.219(12) Uani 1 1 d DU . . 
H7A_16 H -0.0026 0.6259 0.3883 0.328 Uiso 1 1 calc R . . 
H7B_16 H 0.0816 0.6764 0.3856 0.328 Uiso 1 1 calc R . . 
H7C_16 H 0.0399 0.6747 0.4303 0.328 Uiso 1 1 calc R . . 
O8_16 O 0.1002(3) 0.4285(3) 0.5473(2) 0.0644(13) Uani 1 1 d D . . 
C8_16 C 0.0517(6) 0.3515(5) 0.5579(4) 0.086(3) Uani 1 1 d D . . 
H8A_16 H 0.0650 0.3402 0.5870 0.129 Uiso 1 1 calc R . . 
H8B_16 H 0.0558 0.3223 0.5344 0.129 Uiso 1 1 calc R . . 
H8C_16 H 0.0026 0.3417 0.5594 0.129 Uiso 1 1 calc R . . 
O1_20 O 0.7494(3) 0.5280(3) 0.74541(16) 0.0502(11) Uani 1 1 d . . . 
C12_20 C 0.7026(5) 0.5582(5) 0.7579(3) 0.064(2) Uani 1 1 d . . . 
C2_20 C 0.7143(7) 0.5697(8) 0.8094(4) 0.095(4) Uani 1 1 d . . . 
H2A_20 H 0.7631 0.6073 0.8154 0.143 Uiso 1 1 calc R . . 
H2B_20 H 0.7059 0.5256 0.8237 0.143 Uiso 1 1 calc R . . 
H2C_20 H 0.6812 0.5835 0.8218 0.143 Uiso 1 1 calc R . . 
C3_20 C 0.6249(6) 0.4981(6) 0.7514(3) 0.080(2) Uani 1 1 d . . . 
H3A_20 H 0.6165 0.4566 0.7691 0.120 Uiso 1 1 calc R . . 
H3B_20 H 0.6164 0.4851 0.7195 0.120 Uiso 1 1 calc R . . 
H3C_20 H 0.5927 0.5145 0.7615 0.120 Uiso 1 1 calc R . . 
C4_20 C 0.7207(8) 0.6258(7) 0.7311(5) 0.110(4) Uani 1 1 d . . . 
H4A_20 H 0.7705 0.6617 0.7362 0.165 Uiso 1 1 calc R . . 
H4B_20 H 0.6902 0.6443 0.7411 0.165 Uiso 1 1 calc R . . 
H4C_20 H 0.7131 0.6145 0.6989 0.165 Uiso 1 1 calc R . . 
C5_20 C 0.7497(3) 0.5049(3) 0.7031(2) 0.0420(13) Uani 1 1 d . . . 
O5_20 O 0.7157(3) 0.5095(3) 0.67018(16) 0.0516(11) Uani 1 1 d . . . 
N1_21 N 0.7918(3) 0.4742(3) 0.69971(18) 0.0434(11) Uani 1 1 d . . . 
H1_21 H 0.8121 0.4690 0.7238 0.052 Uiso 1 1 calc R . . 
C1A_21 C 0.8024(3) 0.4502(3) 0.6558(2) 0.0420(13) Uani 1 1 d . . . 
H1A_21 H 0.8161 0.4903 0.6342 0.050 Uiso 1 1 calc R . . 
C2_21 C 0.8655(4) 0.4346(5) 0.6572(3) 0.0608(19) Uani 1 1 d . . . 
H2A_21 H 0.8544 0.3973 0.6800 0.073 Uiso 1 1 calc R . . 
H2B_21 H 0.8682 0.4151 0.6276 0.073 Uiso 1 1 calc R . . 
C3_21 C 0.9393(5) 0.4988(7) 0.6680(4) 0.090(3) Uani 1 1 d . . . 
H3_21 H 0.9401 0.5149 0.6997 0.108 Uiso 1 1 calc R . . 
C4_21 C 0.9606(8) 0.5610(8) 0.6353(6) 0.122(5) Uani 1 1 d . . . 
H4A_21 H 1.0072 0.6005 0.6438 0.183 Uiso 1 1 calc R . . 
H4B_21 H 0.9253 0.5763 0.6365 0.183 Uiso 1 1 calc R . . 
H4C_21 H 0.9630 0.5457 0.6046 0.183 Uiso 1 1 calc R . . 
C5_21 C 0.9944(8) 0.4699(12) 0.6628(8) 0.154(8) Uani 1 1 d . . . 
H5A_21 H 1.0424 0.5081 0.6701 0.231 Uiso 1 1 calc R . . 
H5B_21 H 0.9932 0.4542 0.6318 0.231 Uiso 1 1 calc R . . 
H5C_21 H 0.9809 0.4300 0.6834 0.231 Uiso 1 1 calc R . . 
C6_21 C 0.7348(4) 0.3858(4) 0.6369(2) 0.0426(13) Uani 1 1 d . . . 
O6_21 O 0.7330(3) 0.3720(3) 0.59497(14) 0.0481(10) Uani 1 1 d . . . 
N1_22 N 0.6775(3) 0.3463(3) 0.66398(17) 0.0390(10) Uani 1 1 d . . . 
H1_22 H 0.6808 0.3536 0.6932 0.047 Uiso 1 1 calc R . . 
C1A_22 C 0.6100(3) 0.2910(3) 0.6439(2) 0.0417(13) Uani 1 1 d . . . 
H1A_22 H 0.6194 0.2548 0.6296 0.050 Uiso 1 1 calc R . . 
C2_22 C 0.5543(3) 0.2530(4) 0.6815(2) 0.0445(13) Uani 1 1 d . . . 
H2A_22 H 0.5458 0.2885 0.6967 0.053 Uiso 1 1 calc R . . 
H2B_22 H 0.5748 0.2348 0.7041 0.053 Uiso 1 1 calc R . . 
C3_22 C 0.4811(4) 0.1900(4) 0.6661(2) 0.0525(16) Uani 1 1 d . . . 
H3_22 H 0.4596 0.2087 0.6442 0.063 Uiso 1 1 calc R . . 
C4_22 C 0.4878(5) 0.1286(5) 0.6424(3) 0.074(2) Uani 1 1 d . . . 
H4A_22 H 0.4407 0.0912 0.6328 0.111 Uiso 1 1 calc R . . 
H4B_22 H 0.5079 0.1089 0.6636 0.111 Uiso 1 1 calc R . . 
H4C_22 H 0.5189 0.1477 0.6161 0.111 Uiso 1 1 calc R . . 
C5_22 C 0.4307(4) 0.1597(5) 0.7079(3) 0.0621(19) Uani 1 1 d . . . 
H5A_22 H 0.4262 0.1979 0.7222 0.093 Uiso 1 1 calc R . . 
H5B_22 H 0.4504 0.1402 0.7295 0.093 Uiso 1 1 calc R . . 
H5C_22 H 0.3838 0.1222 0.6981 0.093 Uiso 1 1 calc R . . 
C6_22 C 0.5834(3) 0.3210(3) 0.6067(2) 0.0402(13) Uani 1 1 d . . . 
O6_22 O 0.5477(3) 0.2830(2) 0.57374(14) 0.0454(10) Uani 1 1 d . . . 
N1_23 N 0.5988(3) 0.3905(3) 0.61150(16) 0.0372(10) Uani 1 1 d . . . 
H1_23 H 0.6238 0.4153 0.6348 0.045 Uiso 1 1 calc R . . 
C1A_23 C 0.5738(4) 0.4245(3) 0.5778(2) 0.0423(13) Uani 1 1 d D . . 
C2_23 C 0.5970(4) 0.5028(4) 0.5943(2) 0.0469(14) Uani 1 1 d D . . 
H2A_23 H 0.6432 0.5241 0.6101 0.056 Uiso 1 1 calc R . . 
H2B_23 H 0.6013 0.5333 0.5684 0.056 Uiso 1 1 calc R . . 
C3_23 C 0.5368(4) 0.4948(4) 0.6272(2) 0.0522(16) Uani 1 1 d D . . 
H3_23 H 0.5550 0.5063 0.6587 0.063 Uiso 1 1 calc R . . 
O3_23 O 0.5119(4) 0.5431(4) 0.6120(2) 0.0726(16) Uani 1 1 d D . . 
C4_23 C 0.4773(5) 0.4172(4) 0.6237(3) 0.0622(18) Uani 1 1 d D . . 
H4A_23 H 0.4303 0.4139 0.6229 0.075 Uiso 1 1 calc R . . 
H4B_23 H 0.4788 0.3894 0.6496 0.075 Uiso 1 1 calc R . . 
C5_23 C 0.4918(4) 0.3889(4) 0.5780(3) 0.0554(17) Uani 1 1 d D . . 
H5A_23 H 0.4691 0.3365 0.5780 0.066 Uiso 1 1 calc R . . 
H5B_23 H 0.4745 0.4039 0.5517 0.066 Uiso 1 1 calc R . . 
C6_23 C 0.6059(4) 0.4273(4) 0.5300(2) 0.0492(15) Uani 1 1 d . . . 
O6_23 O 0.5749(4) 0.4298(3) 0.49536(18) 0.0698(15) Uani 1 1 d . . . 
C7_23 C 0.4832(9) 0.5644(8) 0.6496(5) 0.120(5) Uani 1 1 d D . . 
H7A_23 H 0.4666 0.5961 0.6386 0.181 Uiso 1 1 calc R . . 
H7B_23 H 0.5203 0.5892 0.6722 0.181 Uiso 1 1 calc R . . 
H7C_23 H 0.4434 0.5222 0.6632 0.181 Uiso 1 1 calc R . . 
N1_24 N 0.6718(3) 0.4330(3) 0.52948(18) 0.0477(12) Uani 1 1 d . . . 
H1_24 H 0.6941 0.4382 0.5551 0.057 Uiso 1 1 calc R . . 
C1A_24 C 0.7063(4) 0.4304(4) 0.4867(2) 0.0530(16) Uani 1 1 d . . . 
H1A_24 H 0.6916 0.4523 0.4625 0.064 Uiso 1 1 calc R . . 
C2_24 C 0.7882(6) 0.4749(5) 0.4912(4) 0.086(3) Uani 1 1 d . . . 
H2A_24 H 0.8113 0.4657 0.4654 0.103 Uiso 1 1 calc R . . 
H2B_24 H 0.8038 0.4622 0.5193 0.103 Uiso 1 1 calc R . . 
C3_24 C 0.8100(7) 0.5588(7) 0.4922(4) 0.096(3) Uani 1 1 d . . . 
H3_24 H 0.7717 0.5648 0.4781 0.116 Uiso 1 1 calc R . . 
C4_24 C 0.8170(10) 0.5785(10) 0.5430(5) 0.131(5) Uani 1 1 d . . . 
H4A_24 H 0.7710 0.5500 0.5578 0.197 Uiso 1 1 calc R . . 
H4B_24 H 0.8322 0.6290 0.5461 0.197 Uiso 1 1 calc R . . 
H4C_24 H 0.8521 0.5690 0.5570 0.197 Uiso 1 1 calc R . . 
C5_24 C 0.8749(8) 0.5961(8) 0.4660(5) 0.117(4) Uani 1 1 d . . . 
H5A_24 H 0.8650 0.5806 0.4345 0.175 Uiso 1 1 calc R . . 
H5B_24 H 0.9105 0.5855 0.4781 0.175 Uiso 1 1 calc R . . 
H5C_24 H 0.8930 0.6473 0.4677 0.175 Uiso 1 1 calc R . . 
C6_24 C 0.6849(4) 0.3543(4) 0.4717(2) 0.0460(14) Uani 1 1 d . . . 
O6_24 O 0.6790(3) 0.3383(3) 0.43040(16) 0.0575(12) Uani 1 1 d . . . 
N1_25 N 0.6739(3) 0.3065(3) 0.50475(16) 0.0391(11) Uani 1 1 d . . . 
H1_25 H 0.6784 0.3194 0.5331 0.047 Uiso 1 1 calc R . . 
C1A_25 C 0.6547(3) 0.2335(3) 0.4934(2) 0.0405(12) Uani 1 1 d . . . 
H1A_25 H 0.6924 0.2341 0.4738 0.049 Uiso 1 1 calc R . . 
C2_25 C 0.6486(4) 0.1917(4) 0.5386(2) 0.0484(14) Uani 1 1 d . . . 
H2A_25 H 0.6937 0.2181 0.5555 0.058 Uiso 1 1 calc R . . 
H2B_25 H 0.6105 0.1906 0.5575 0.058 Uiso 1 1 calc R . . 
C3_25 C 0.6325(5) 0.1144(4) 0.5310(3) 0.0603(18) Uani 1 1 d . . . 
H3_25 H 0.5886 0.0891 0.5123 0.072 Uiso 1 1 calc R . . 
C4_25 C 0.6928(5) 0.1101(5) 0.5067(3) 0.069(2) Uani 1 1 d . . . 
H4A_25 H 0.6793 0.0603 0.5025 0.104 Uiso 1 1 calc R . . 
H4B_25 H 0.7362 0.1341 0.5247 0.104 Uiso 1 1 calc R . . 
H4C_25 H 0.7012 0.1333 0.4772 0.104 Uiso 1 1 calc R . . 
C5_25 C 0.6172(6) 0.0767(5) 0.5782(3) 0.075(2) Uani 1 1 d . . . 
H5A_25 H 0.6062 0.0276 0.5742 0.112 Uiso 1 1 calc R . . 
H5B_25 H 0.5768 0.0772 0.5923 0.112 Uiso 1 1 calc R . . 
H5C_25 H 0.6591 0.1019 0.5975 0.112 Uiso 1 1 calc R . . 
C6_25 C 0.5824(4) 0.1958(4) 0.4681(2) 0.0462(14) Uani 1 1 d . . . 
O6_25 O 0.5722(3) 0.1545(3) 0.43534(16) 0.0525(11) Uani 1 1 d . . . 
N1_26 N 0.5303(3) 0.2085(4) 0.4824(2) 0.0572(15) Uani 1 1 d . . . 
H1_26 H 0.5387 0.2372 0.5053 0.069 Uiso 1 1 calc R . . 
C1A_26 C 0.4593(5) 0.1750(5) 0.4602(3) 0.067(2) Uani 1 1 d D . . 
C2_26 C 0.4641(5) 0.2092(6) 0.4127(3) 0.075(2) Uani 1 1 d D . . 
H2A_26 H 0.4247 0.1756 0.3931 0.090 Uiso 1 1 calc R . . 
H2B_26 H 0.5096 0.2218 0.3979 0.090 Uiso 1 1 calc R . . 
C3_26 C 0.4586(5) 0.2779(6) 0.4213(3) 0.082(3) Uani 1 1 d D . . 
H3_26 H 0.5055 0.3221 0.4172 0.099 Uiso 1 1 calc R . . 
O3_26 O 0.4054(4) 0.2745(4) 0.3890(3) 0.094(2) Uani 1 1 d D . . 
C4_26 C 0.4312(6) 0.2697(7) 0.4717(4) 0.092(3) Uani 1 1 d D . . 
H4A_26 H 0.4693 0.3049 0.4913 0.110 Uiso 1 1 calc R . . 
H4B_26 H 0.3901 0.2773 0.4733 0.110 Uiso 1 1 calc R . . 
C5_26 C 0.4093(5) 0.1935(6) 0.4870(4) 0.084(3) Uani 1 1 d D . . 
H5A_26 H 0.3590 0.1601 0.4796 0.100 Uiso 1 1 calc R . . 
H5B_26 H 0.4163 0.1919 0.5198 0.100 Uiso 1 1 calc R . . 
C6_26 C 0.4296(5) 0.0950(5) 0.4581(4) 0.072(2) Uani 1 1 d . . . 
O6_26 O 0.3940(4) 0.0564(5) 0.4256(3) 0.099(2) Uani 1 1 d . . . 
C7_26 C 0.4078(9) 0.3420(8) 0.3827(6) 0.124(5) Uani 1 1 d D . . 
H7A_26 H 0.3713 0.3360 0.3609 0.186 Uiso 1 1 calc R . . 
H7B_26 H 0.4546 0.3773 0.3713 0.186 Uiso 1 1 calc R . . 
H7C_26 H 0.3990 0.3581 0.4115 0.186 Uiso 1 1 calc R . . 
O8_26 O 0.4430(4) 0.0681(4) 0.4961(3) 0.0870(19) Uani 1 1 d D . . 
C8_26 C 0.4182(8) -0.0084(7) 0.4948(6) 0.125(5) Uani 1 1 d D . . 
H8A_26 H 0.4300 -0.0227 0.5233 0.188 Uiso 1 1 calc R . . 
H8B_26 H 0.4415 -0.0184 0.4700 0.188 Uiso 1 1 calc R . . 
H8C_26 H 0.3667 -0.0349 0.4904 0.188 Uiso 1 1 calc R . . 
O1_30 O 0.0899(3) 0.2099(3) 0.7214(2) 0.0628(13) Uani 1 1 d . . . 
C13_30 C 0.0421(4) 0.2399(5) 0.7299(3) 0.0642(19) Uani 1 1 d . . . 
C2_30 C 0.0643(7) 0.2715(8) 0.7784(4) 0.099(4) Uani 1 1 d . . . 
H2A_30 H 0.0546 0.2333 0.7996 0.149 Uiso 1 1 calc R . . 
H2B_30 H 0.0372 0.2944 0.7871 0.149 Uiso 1 1 calc R . . 
H2C_30 H 0.1151 0.3065 0.7788 0.149 Uiso 1 1 calc R . . 
C3_30 C -0.0350(5) 0.1801(5) 0.7296(3) 0.072(2) Uani 1 1 d . . . 
H3A_30 H -0.0413 0.1444 0.7520 0.108 Uiso 1 1 calc R . . 
H3B_30 H -0.0471 0.1582 0.6997 0.108 Uiso 1 1 calc R . . 
H3C_30 H -0.0660 0.1993 0.7370 0.108 Uiso 1 1 calc R . . 
C4_30 C 0.0564(6) 0.2981(5) 0.6957(4) 0.082(3) Uani 1 1 d . . . 
H4A_30 H 0.1062 0.3356 0.6977 0.122 Uiso 1 1 calc R . . 
H4B_30 H 0.0258 0.3180 0.7022 0.122 Uiso 1 1 calc R . . 
H4C_30 H 0.0465 0.2779 0.6653 0.122 Uiso 1 1 calc R . . 
C5_30 C 0.0884(4) 0.1788(4) 0.6814(3) 0.0515(16) Uani 1 1 d . . . 
O5_30 O 0.0534(3) 0.1764(3) 0.64755(18) 0.0566(12) Uani 1 1 d . . . 
N1_31 N 0.1317(3) 0.1494(3) 0.6821(2) 0.0531(14) Uani 1 1 d . . . 
H1_31 H 0.1515 0.1470 0.7073 0.064 Uiso 1 1 calc R . . 
C1A_31 C 0.1442(4) 0.1219(4) 0.6395(2) 0.0497(15) Uani 1 1 d . . . 
H1A_31 H 0.1588 0.1600 0.6162 0.060 Uiso 1 1 calc R . . 
C2_31 C 0.2063(4) 0.1052(4) 0.6442(2) 0.0482(14) Uani 1 1 d . . . 
H2A_31 H 0.2046 0.0866 0.6749 0.058 Uiso 1 1 calc R . . 
H2B_31 H 0.1981 0.0673 0.6226 0.058 Uiso 1 1 calc R . . 
C3_31 C 0.2822(4) 0.1699(5) 0.6360(3) 0.0618(18) Uani 1 1 d . . . 
H3_31 H 0.3165 0.1525 0.6402 0.074 Uiso 1 1 calc R . . 
C4_31 C 0.2910(5) 0.1976(5) 0.5861(3) 0.074(2) Uani 1 1 d . . . 
H4A_31 H 0.3391 0.2378 0.5819 0.111 Uiso 1 1 calc R . . 
H4B_31 H 0.2564 0.2128 0.5801 0.111 Uiso 1 1 calc R . . 
H4C_31 H 0.2831 0.1594 0.5653 0.111 Uiso 1 1 calc R . . 
C5_31 C 0.3039(5) 0.2324(5) 0.6694(4) 0.073(2) Uani 1 1 d . . . 
H5A_31 H 0.3519 0.2706 0.6622 0.109 Uiso 1 1 calc R . . 
H5B_31 H 0.3031 0.2158 0.7002 0.109 Uiso 1 1 calc R . . 
H5C_31 H 0.2706 0.2500 0.6669 0.109 Uiso 1 1 calc R . . 
C6_31 C 0.0762(4) 0.0548(4) 0.6217(2) 0.0483(15) Uani 1 1 d . . . 
O6_31 O 0.0745(3) 0.0386(3) 0.58006(15) 0.0489(10) Uani 1 1 d . . . 
N1_32 N 0.0204(3) 0.0179(3) 0.64899(19) 0.0494(13) Uani 1 1 d . . . 
H1_32 H 0.0235 0.0284 0.6777 0.059 Uiso 1 1 calc R . . 
C1A_32 C -0.0486(4) -0.0425(4) 0.6296(3) 0.0574(17) Uani 1 1 d . . . 
H1A_32 H -0.0385 -0.0790 0.6166 0.069 Uiso 1 1 calc R . . 
C2_32 C -0.1083(5) -0.0795(6) 0.6676(3) 0.077(3) Uani 1 1 d . . . 
H2A_32 H -0.0915 -0.0497 0.6950 0.092 Uiso 1 1 calc R . . 
H2B_32 H -0.1515 -0.0795 0.6571 0.092 Uiso 1 1 calc R . . 
C3_32 C -0.1285(7) -0.1536(7) 0.6803(5) 0.106(4) Uani 1 1 d . . . 
H3_32 H -0.1606 -0.1669 0.7070 0.127 Uiso 1 1 calc R . . 
C4_32 C -0.0613(8) -0.1568(7) 0.6950(4) 0.101(3) Uani 1 1 d . . . 
H4A_32 H -0.0752 -0.2055 0.7037 0.151 Uiso 1 1 calc R . . 
H4B_32 H -0.0389 -0.1251 0.7207 0.151 Uiso 1 1 calc R . . 
H4C_32 H -0.0277 -0.1419 0.6699 0.151 Uiso 1 1 calc R . . 
C5_32 C -0.1712(11) -0.2033(12) 0.6417(6) 0.165(8) Uani 1 1 d . . . 
H5A_32 H -0.1850 -0.2522 0.6497 0.248 Uiso 1 1 calc R . . 
H5B_32 H -0.1422 -0.1896 0.6143 0.248 Uiso 1 1 calc R . . 
H5C_32 H -0.2139 -0.2000 0.6363 0.248 Uiso 1 1 calc R . . 
C6_32 C -0.0762(4) -0.0150(4) 0.5919(2) 0.0548(17) Uani 1 1 d . . . 
O6_32 O -0.1116(3) -0.0582(3) 0.56033(18) 0.0673(14) Uani 1 1 d . . . 
N1_33 N -0.0625(3) 0.0528(4) 0.5930(2) 0.0550(14) Uani 1 1 d . . . 
H1_33 H -0.0369 0.0807 0.6150 0.066 Uiso 1 1 calc R . . 
C1A_33 C -0.0902(4) 0.0812(5) 0.5571(3) 0.0604(19) Uani 1 1 d D . . 
C2_33 C -0.0625(5) 0.1628(5) 0.5674(3) 0.067(2) Uani 1 1 d D . . 
H2A_33 H -0.0149 0.1854 0.5814 0.081 Uiso 1 1 calc R . . 
H2B_33 H -0.0599 0.1885 0.5394 0.081 Uiso 1 1 calc R . . 
C3_33 C -0.1189(5) 0.1633(6) 0.6012(3) 0.073(2) Uani 1 1 d D . . 
H3_33 H -0.0982 0.1778 0.6320 0.088 Uiso 1 1 calc R . . 
O3_33 O -0.1371(4) 0.2143(4) 0.5830(2) 0.0807(17) Uani 1 1 d D . . 
C4_33 C -0.1825(5) 0.0854(6) 0.6014(3) 0.079(3) Uani 1 1 d D . . 
H4A_33 H -0.2280 0.0852 0.5991 0.095 Uiso 1 1 calc R . . 
H4B_33 H -0.1827 0.0612 0.6297 0.095 Uiso 1 1 calc R . . 
C5_33 C -0.1725(5) 0.0461(6) 0.5592(3) 0.077(2) Uani 1 1 d D . . 
H5A_33 H -0.1955 -0.0057 0.5642 0.092 Uiso 1 1 calc R . . 
H5B_33 H -0.1917 0.0552 0.5313 0.092 Uiso 1 1 calc R . . 
C6_33 C -0.0607(4) 0.0778(5) 0.5096(3) 0.0611(19) Uani 1 1 d . . . 
O6_33 O -0.0948(4) 0.0694(6) 0.4752(2) 0.098(2) Uani 1 1 d . . . 
C7_33 C -0.1686(7) 0.2414(8) 0.6163(4) 0.102(4) Uani 1 1 d D . . 
H7A_33 H -0.1796 0.2750 0.6015 0.153 Uiso 1 1 calc R . . 
H7B_33 H -0.1347 0.2655 0.6407 0.153 Uiso 1 1 calc R . . 
H7C_33 H -0.2121 0.2017 0.6285 0.153 Uiso 1 1 calc R . . 
N1_34 N 0.0072(3) 0.0875(3) 0.50946(19) 0.0460(12) Uani 1 1 d . . . 
H1_34 H 0.0302 0.0954 0.5350 0.055 Uiso 1 1 calc R . . 
C1A_34 C 0.0420(4) 0.0848(4) 0.4672(2) 0.0473(14) Uani 1 1 d . . . 
H1A_34 H 0.0248 0.1033 0.4423 0.057 Uiso 1 1 calc R . . 
C2_34 C 0.1255(4) 0.1321(4) 0.4694(2) 0.0479(14) Uani 1 1 d . . . 
H2A_34 H 0.1413 0.1261 0.4995 0.058 Uiso 1 1 calc R . . 
H2B_34 H 0.1461 0.1141 0.4469 0.058 Uiso 1 1 calc R . . 
C3_34 C 0.1557(4) 0.2119(4) 0.4610(2) 0.0518(15) Uani 1 1 d . . . 
H3_34 H 0.1361 0.2169 0.4317 0.062 Uiso 1 1 calc R . . 
C4_34 C 0.2372(4) 0.2499(4) 0.4561(3) 0.0619(18) Uani 1 1 d . . . 
H4A_34 H 0.2556 0.3005 0.4504 0.093 Uiso 1 1 calc R . . 
H4B_34 H 0.2496 0.2291 0.4310 0.093 Uiso 1 1 calc R . . 
H4C_34 H 0.2580 0.2442 0.4840 0.093 Uiso 1 1 calc R . . 
C5_34 C 0.1338(6) 0.2481(5) 0.4973(3) 0.074(2) Uani 1 1 d . . . 
H5A_34 H 0.1542 0.2985 0.4899 0.111 Uiso 1 1 calc R . . 
H5B_34 H 0.1513 0.2434 0.5267 0.111 Uiso 1 1 calc R . . 
H5C_34 H 0.0820 0.2254 0.4981 0.111 Uiso 1 1 calc R . . 
C6_34 C 0.0226(3) 0.0070(4) 0.4548(2) 0.0438(13) Uani 1 1 d . . . 
O6_34 O 0.0183(3) -0.0122(3) 0.41441(17) 0.0583(12) Uani 1 1 d . . . 
N1_35 N 0.0160(3) -0.0362(3) 0.48960(19) 0.0471(12) Uani 1 1 d . . . 
H1_35 H 0.0206 -0.0206 0.5173 0.057 Uiso 1 1 calc R . . 
C1A_35 C 0.0010(4) -0.1089(4) 0.4813(3) 0.0565(17) Uani 1 1 d . . . 
H1A_35 H 0.0380 -0.1068 0.4604 0.068 Uiso 1 1 calc R . . 
C2_35 C 0.0068(6) -0.1414(5) 0.5270(3) 0.075(2) Uani 1 1 d . . . 
H2A_35 H 0.0546 -0.1096 0.5395 0.090 Uiso 1 1 calc R . . 
H2B_35 H -0.0278 -0.1401 0.5481 0.090 Uiso 1 1 calc R . . 
C3_35 C -0.0050(6) -0.2155(6) 0.5273(4) 0.088(3) Uani 1 1 d . . . 
H3_35 H -0.0537 -0.2470 0.5150 0.106 Uiso 1 1 calc R . . 
C4_35 C -0.0044(10) -0.2424(9) 0.5775(5) 0.129(5) Uani 1 1 d . . . 
H4A_35 H -0.0128 -0.2910 0.5765 0.193 Uiso 1 1 calc R . . 
H4B_35 H -0.0417 -0.2413 0.5953 0.193 Uiso 1 1 calc R . . 
H4C_35 H 0.0418 -0.2113 0.5914 0.193 Uiso 1 1 calc R . . 
C5_35 C 0.0475(9) -0.2243(7) 0.4959(7) 0.126(5) Uani 1 1 d . . . 
H5A_35 H 0.0370 -0.2737 0.4969 0.189 Uiso 1 1 calc R . . 
H5B_35 H 0.0963 -0.1929 0.5061 0.189 Uiso 1 1 calc R . . 
H5C_35 H 0.0422 -0.2120 0.4650 0.189 Uiso 1 1 calc R . . 
C6_35 C -0.0744(4) -0.1574(4) 0.4593(3) 0.0553(17) Uani 1 1 d . . . 
O6_35 O -0.0826(3) -0.2005(3) 0.4283(2) 0.0661(14) Uani 1 1 d . . . 
N1_36 N -0.1281(3) -0.1497(4) 0.4771(2) 0.0638(16) Uani 1 1 d . . . 
H1_36 H -0.1180 -0.1164 0.4972 0.077 Uiso 1 1 calc R . . 
C1A_36 C -0.2025(5) -0.1960(6) 0.4632(3) 0.079(3) Uani 1 1 d D . . 
C2_36 C -0.2468(6) -0.1685(7) 0.4889(4) 0.091(3) Uani 1 1 d D . . 
H2A_36 H -0.2888 -0.1760 0.4715 0.109 Uiso 1 1 calc R . . 
H2B_36 H -0.2177 -0.1178 0.4973 0.109 Uiso 1 1 calc R . . 
C3_36 C -0.2685(7) -0.2205(8) 0.5326(5) 0.112(4) Uani 1 1 d D . . 
H3_36 H -0.2500 -0.1904 0.5602 0.134 Uiso 1 1 calc R . . 
O3_36 O -0.3465(5) -0.2600(6) 0.5348(3) 0.121(3) Uani 1 1 d D . . 
C4_36 C -0.2296(9) -0.2700(6) 0.5283(5) 0.105(4) Uani 1 1 d D . . 
H4A_36 H -0.1803 -0.2452 0.5398 0.126 Uiso 1 1 calc R . . 
H4B_36 H -0.2573 -0.3166 0.5434 0.126 Uiso 1 1 calc R . . 
C5_36 C -0.2327(6) -0.2760(6) 0.4802(5) 0.097(3) Uani 1 1 d D . . 
H5A_36 H -0.2820 -0.3070 0.4697 0.117 Uiso 1 1 calc R . . 
H5B_36 H -0.2028 -0.2954 0.4691 0.117 Uiso 1 1 calc R . . 
C6_36 C -0.2146(5) -0.1952(6) 0.4126(4) 0.085(3) Uani 1 1 d . . . 
O6_36 O -0.2579(6) -0.2492(6) 0.3891(4) 0.134(3) Uani 1 1 d . . . 
C7_36 C -0.3711(11) -0.2872(11) 0.5810(5) 0.154(7) Uani 1 1 d DU . . 
H7A_36 H -0.4231 -0.3135 0.5817 0.231 Uiso 1 1 calc R . . 
H7B_36 H -0.3533 -0.2473 0.6021 0.231 Uiso 1 1 calc R . . 
H7C_36 H -0.3532 -0.3188 0.5897 0.231 Uiso 1 1 calc R . . 
O8_36 O -0.1765(5) -0.1327(5) 0.3947(3) 0.106(2) Uani 1 1 d D . . 
C8_36 C -0.1961(10) -0.1215(10) 0.3488(5) 0.129(5) Uani 1 1 d D . . 
H8A_36 H -0.1633 -0.0728 0.3391 0.193 Uiso 1 1 calc R . . 
H8B_36 H -0.2446 -0.1295 0.3492 0.193 Uiso 1 1 calc R . . 
H8C_36 H -0.1935 -0.1548 0.3279 0.193 Uiso 1 1 calc R . . 
 
loop_ 
 _atom_site_aniso_label 
 _atom_site_aniso_U_11 
 _atom_site_aniso_U_22 
 _atom_site_aniso_U_33 
 _atom_site_aniso_U_23 
 _atom_site_aniso_U_13 
 _atom_site_aniso_U_12 
O1_10 0.060(3) 0.062(3) 0.030(2) -0.0102(19) -0.0040(19) 0.037(2) 
C11_10 0.059(4) 0.058(4) 0.042(4) -0.003(3) -0.003(3) 0.036(3) 
C2_10 0.100(7) 0.100(7) 0.054(5) -0.023(4) -0.004(4) 0.068(6) 
C3_10 0.063(4) 0.073(5) 0.045(4) 0.003(3) 0.004(3) 0.041(4) 
C4_10 0.087(6) 0.073(5) 0.080(6) 0.001(5) 0.013(5) 0.047(5) 
C5_10 0.048(3) 0.046(3) 0.031(3) -0.003(2) 0.000(2) 0.026(3) 
O5_10 0.062(3) 0.054(2) 0.034(2) 0.0014(19) 0.005(2) 0.034(2) 
N1_11 0.060(3) 0.058(3) 0.022(2) -0.005(2) -0.001(2) 0.035(3) 
C1A_11 0.049(3) 0.049(3) 0.031(3) 0.001(2) 0.001(2) 0.027(3) 
C2_11 0.059(4) 0.056(4) 0.027(3) -0.007(3) 0.000(3) 0.033(3) 
C3_11 0.059(4) 0.064(4) 0.041(4) -0.006(3) -0.001(3) 0.033(3) 
C4_11 0.065(5) 0.076(5) 0.053(4) -0.006(4) -0.004(3) 0.038(4) 
C5_11 0.069(5) 0.076(5) 0.060(5) -0.009(4) -0.009(4) 0.042(4) 
C6_11 0.050(3) 0.048(3) 0.020(3) -0.001(2) 0.001(2) 0.026(3) 
O6_11 0.052(2) 0.054(2) 0.029(2) -0.0013(18) 0.0016(17) 0.028(2) 
N1_12 0.055(3) 0.052(3) 0.025(2) 0.001(2) 0.005(2) 0.028(2) 
C1A_12 0.063(4) 0.058(4) 0.057(4) -0.004(3) 0.002(3) 0.028(4) 
C2_12 0.079(6) 0.090(7) 0.086(7) 0.019(5) 0.015(5) 0.036(5) 
C3_12 0.102(8) 0.101(8) 0.067(6) 0.002(5) 0.003(5) 0.041(6) 
C4_12 0.095(8) 0.115(10) 0.118(11) -0.005(8) 0.022(7) 0.032(7) 
C5_12 0.137(11) 0.097(8) 0.096(9) 0.001(7) 0.013(8) 0.058(8) 
C6_12 0.063(4) 0.076(5) 0.040(4) -0.013(3) -0.001(3) 0.040(4) 
O6_12 0.068(3) 0.087(4) 0.053(3) -0.024(3) -0.002(3) 0.034(3) 
N1_13 0.068(4) 0.071(4) 0.035(3) -0.009(3) -0.005(3) 0.042(3) 
C1A_13 0.097(6) 0.099(6) 0.042(4) -0.013(4) -0.013(4) 0.066(6) 
C2_13 0.149(10) 0.108(8) 0.048(5) -0.007(5) -0.003(5) 0.088(8) 
C3_13 0.203(15) 0.176(13) 0.076(7) -0.018(8) -0.033(8) 0.171(13) 
O3_13 0.33(2) 0.212(17) 0.209(18) -0.043(14) -0.049(17) 0.177(18) 
C4_13 0.143(13) 0.175(16) 0.114(11) -0.022(11) -0.006(10) 0.099(13) 
C5_13 0.115(9) 0.166(13) 0.081(8) -0.022(8) -0.031(7) 0.091(9) 
C6_13 0.101(6) 0.095(6) 0.034(4) -0.014(4) -0.025(4) 0.067(5) 
O6_13 0.134(6) 0.155(7) 0.036(3) -0.018(4) -0.026(3) 0.096(6) 
C7_13 0.179(18) 0.165(18) 0.171(18) -0.014(14) 0.007(15) 0.091(15) 
N1_14 0.067(4) 0.052(3) 0.031(3) -0.004(2) -0.004(2) 0.028(3) 
C1A_14 0.070(4) 0.059(4) 0.033(3) -0.003(3) -0.006(3) 0.027(4) 
C2_14 0.064(4) 0.057(4) 0.038(4) -0.005(3) 0.004(3) 0.022(3) 
C3_14 0.081(6) 0.055(5) 0.102(8) -0.010(5) -0.017(5) 0.021(4) 
C4_14 0.070(5) 0.066(5) 0.085(6) -0.012(4) -0.008(5) 0.029(4) 
C5_14 0.135(13) 0.124(12) 0.155(16) 0.040(11) -0.020(11) 0.034(10) 
C6_14 0.055(4) 0.055(4) 0.022(3) -0.001(2) 0.000(2) 0.025(3) 
O6_14 0.068(3) 0.057(3) 0.026(2) -0.0045(19) -0.004(2) 0.027(2) 
N1_15 0.048(3) 0.044(3) 0.022(2) 0.0011(19) 0.0003(19) 0.021(2) 
C1A_15 0.042(3) 0.043(3) 0.027(3) -0.003(2) -0.006(2) 0.021(3) 
C2_15 0.051(3) 0.050(3) 0.032(3) 0.001(3) -0.001(2) 0.025(3) 
C3_15 0.055(4) 0.049(3) 0.037(3) 0.001(3) -0.004(3) 0.028(3) 
C4_15 0.083(6) 0.067(5) 0.059(5) 0.008(4) 0.003(4) 0.039(4) 
C5_15 0.071(5) 0.067(4) 0.052(4) -0.005(3) -0.004(3) 0.040(4) 
C6_15 0.048(3) 0.049(3) 0.022(3) -0.001(2) -0.002(2) 0.023(3) 
O6_15 0.050(2) 0.052(2) 0.027(2) -0.0022(18) -0.0008(17) 0.025(2) 
N1_16 0.053(3) 0.050(3) 0.041(3) -0.006(2) -0.009(2) 0.027(3) 
C1A_16 0.052(4) 0.067(4) 0.041(4) -0.011(3) -0.012(3) 0.035(3) 
C2_16 0.082(6) 0.090(6) 0.064(5) 0.003(5) -0.013(4) 0.051(5) 
C3_16 0.144(12) 0.125(11) 0.132(12) 0.005(9) -0.031(10) 0.088(10) 
O3_16 0.254(18) 0.234(16) 0.270(19) -0.027(14) -0.084(15) 0.190(16) 
C4_16 0.25(3) 0.21(2) 0.24(3) 0.00(2) -0.03(2) 0.14(2) 
C5_16 0.073(5) 0.092(6) 0.088(7) -0.009(5) 0.001(5) 0.054(5) 
C6_16 0.053(4) 0.061(4) 0.043(4) -0.003(3) -0.002(3) 0.033(3) 
O6_16 0.063(3) 0.084(4) 0.059(3) -0.010(3) -0.011(3) 0.029(3) 
C7_16 0.20(2) 0.29(3) 0.22(2) 0.03(2) -0.048(19) 0.16(2) 
O8_16 0.063(3) 0.070(3) 0.057(3) 0.004(3) 0.001(2) 0.031(3) 
C8_16 0.086(6) 0.076(6) 0.085(7) 0.018(5) 0.014(5) 0.032(5) 
O1_20 0.063(3) 0.063(3) 0.036(2) -0.008(2) -0.009(2) 0.039(2) 
C12_20 0.077(5) 0.083(5) 0.052(4) -0.014(4) -0.012(4) 0.054(5) 
C2_20 0.119(8) 0.140(10) 0.066(6) -0.045(6) -0.033(6) 0.094(8) 
C3_20 0.087(6) 0.105(7) 0.060(5) 0.001(5) 0.008(4) 0.056(6) 
C4_20 0.128(10) 0.098(8) 0.124(11) -0.002(7) 0.003(8) 0.071(8) 
C5_20 0.049(3) 0.043(3) 0.035(3) 0.003(2) -0.003(3) 0.024(3) 
O5_20 0.060(3) 0.065(3) 0.038(2) 0.000(2) -0.010(2) 0.037(2) 
N1_21 0.046(3) 0.053(3) 0.032(3) 0.004(2) -0.003(2) 0.026(2) 
C1A_21 0.050(3) 0.050(3) 0.028(3) 0.007(2) 0.002(2) 0.026(3) 
C2_21 0.060(4) 0.083(5) 0.049(4) 0.018(4) 0.008(3) 0.042(4) 
C3_21 0.066(5) 0.111(8) 0.093(7) 0.039(6) 0.013(5) 0.044(5) 
C4_21 0.098(9) 0.117(10) 0.135(12) 0.055(9) 0.017(8) 0.042(8) 
C5_21 0.087(9) 0.194(18) 0.190(19) 0.062(14) 0.011(10) 0.077(11) 
C6_21 0.055(4) 0.056(4) 0.027(3) 0.004(3) 0.005(2) 0.035(3) 
O6_21 0.064(3) 0.059(3) 0.025(2) 0.0037(18) 0.0073(18) 0.033(2) 
N1_22 0.047(3) 0.047(3) 0.024(2) 0.0007(19) -0.0005(19) 0.024(2) 
C1A_22 0.051(3) 0.046(3) 0.027(3) 0.002(2) 0.001(2) 0.024(3) 
C2_22 0.048(3) 0.050(3) 0.034(3) 0.000(3) 0.006(3) 0.023(3) 
C3_22 0.058(4) 0.059(4) 0.036(3) 0.005(3) -0.002(3) 0.026(3) 
C4_22 0.082(6) 0.068(5) 0.062(5) 0.001(4) 0.012(4) 0.029(4) 
C5_22 0.059(4) 0.071(5) 0.042(4) 0.009(3) 0.004(3) 0.022(4) 
C6_22 0.053(3) 0.045(3) 0.024(3) 0.001(2) 0.003(2) 0.025(3) 
O6_22 0.059(3) 0.049(2) 0.028(2) -0.0001(18) -0.0004(18) 0.026(2) 
N1_23 0.044(3) 0.040(2) 0.027(2) -0.0016(19) -0.0033(19) 0.020(2) 
C1A_23 0.055(3) 0.046(3) 0.030(3) -0.001(2) -0.006(3) 0.028(3) 
C2_23 0.056(4) 0.052(3) 0.036(3) -0.002(3) -0.006(3) 0.029(3) 
C3_23 0.068(4) 0.063(4) 0.037(3) -0.004(3) -0.009(3) 0.041(4) 
O3_23 0.101(4) 0.084(4) 0.059(3) -0.002(3) -0.006(3) 0.066(4) 
C4_23 0.068(5) 0.072(5) 0.051(4) 0.008(4) 0.000(3) 0.038(4) 
C5_23 0.057(4) 0.054(4) 0.054(4) 0.001(3) -0.011(3) 0.027(3) 
C6_23 0.077(5) 0.057(4) 0.020(3) 0.002(2) -0.002(3) 0.038(4) 
O6_23 0.097(4) 0.085(4) 0.036(3) 0.003(2) -0.008(3) 0.052(3) 
C7_23 0.140(12) 0.105(9) 0.128(11) -0.028(8) -0.007(9) 0.070(9) 
N1_24 0.063(3) 0.052(3) 0.028(3) 0.004(2) 0.004(2) 0.030(3) 
C1A_24 0.077(5) 0.057(4) 0.029(3) 0.012(3) 0.016(3) 0.037(4) 
C2_24 0.095(7) 0.068(5) 0.069(6) -0.005(4) 0.039(5) 0.023(5) 
C3_24 0.097(8) 0.094(7) 0.082(7) -0.003(6) 0.003(6) 0.036(6) 
C4_24 0.140(13) 0.130(12) 0.096(10) 0.003(8) -0.010(9) 0.047(10) 
C5_24 0.123(10) 0.093(8) 0.112(10) 0.014(7) -0.005(8) 0.037(8) 
C6_24 0.060(4) 0.054(4) 0.027(3) 0.007(3) 0.007(3) 0.031(3) 
O6_24 0.080(3) 0.069(3) 0.030(2) 0.001(2) 0.000(2) 0.042(3) 
N1_25 0.050(3) 0.046(3) 0.019(2) 0.0025(19) 0.0017(19) 0.023(2) 
C1A_25 0.043(3) 0.047(3) 0.030(3) -0.003(2) 0.005(2) 0.022(3) 
C2_25 0.053(4) 0.052(4) 0.044(4) 0.003(3) 0.005(3) 0.029(3) 
C3_25 0.068(4) 0.058(4) 0.055(4) 0.004(3) 0.012(3) 0.032(4) 
C4_25 0.075(5) 0.060(4) 0.076(6) 0.002(4) 0.008(4) 0.037(4) 
C5_25 0.087(6) 0.066(5) 0.074(6) 0.018(4) 0.020(5) 0.040(5) 
C6_25 0.049(3) 0.055(4) 0.034(3) -0.002(3) 0.004(3) 0.025(3) 
O6_25 0.055(3) 0.056(3) 0.041(3) -0.008(2) 0.007(2) 0.024(2) 
N1_26 0.053(3) 0.074(4) 0.046(3) -0.013(3) 0.002(3) 0.032(3) 
C1A_26 0.063(4) 0.099(6) 0.044(4) -0.023(4) -0.005(3) 0.043(4) 
C2_26 0.080(6) 0.100(7) 0.055(5) -0.027(5) -0.022(4) 0.053(5) 
C3_26 0.065(5) 0.099(7) 0.080(6) -0.032(5) -0.007(5) 0.039(5) 
O3_26 0.101(5) 0.103(5) 0.084(5) -0.003(4) 0.000(4) 0.056(4) 
C4_26 0.080(6) 0.121(9) 0.084(7) -0.031(6) -0.014(5) 0.056(6) 
C5_26 0.058(5) 0.108(8) 0.085(7) -0.026(6) 0.004(4) 0.042(5) 
C6_26 0.054(4) 0.080(6) 0.077(6) -0.025(5) 0.001(4) 0.029(4) 
O6_26 0.072(4) 0.109(6) 0.095(5) -0.029(4) -0.011(4) 0.030(4) 
C7_26 0.132(11) 0.120(11) 0.130(12) 0.042(9) 0.044(9) 0.070(9) 
O8_26 0.078(4) 0.090(5) 0.077(5) -0.006(4) 0.015(3) 0.029(4) 
C8_26 0.116(10) 0.098(9) 0.119(11) -0.002(8) 0.026(9) 0.021(8) 
O1_30 0.065(3) 0.071(3) 0.063(3) -0.016(3) -0.009(2) 0.042(3) 
C13_30 0.061(4) 0.072(5) 0.069(5) -0.013(4) -0.004(4) 0.041(4) 
C2_30 0.110(8) 0.123(9) 0.090(8) -0.039(7) -0.009(6) 0.078(8) 
C3_30 0.074(5) 0.078(5) 0.073(6) 0.018(4) 0.015(4) 0.045(5) 
C4_30 0.083(6) 0.067(5) 0.097(7) 0.007(5) 0.021(5) 0.039(5) 
C5_30 0.051(4) 0.054(4) 0.053(4) -0.005(3) -0.004(3) 0.029(3) 
O5_30 0.059(3) 0.067(3) 0.052(3) -0.001(2) -0.005(2) 0.037(3) 
N1_31 0.057(3) 0.065(4) 0.047(3) -0.011(3) -0.006(3) 0.037(3) 
C1A_31 0.061(4) 0.058(4) 0.036(3) -0.006(3) -0.006(3) 0.034(3) 
C2_31 0.048(3) 0.057(4) 0.043(4) -0.004(3) -0.005(3) 0.029(3) 
C3_31 0.054(4) 0.069(5) 0.061(5) -0.006(4) -0.004(3) 0.030(4) 
C4_31 0.062(5) 0.087(6) 0.069(6) 0.002(5) 0.010(4) 0.034(4) 
C5_31 0.066(5) 0.071(5) 0.077(6) -0.004(4) -0.001(4) 0.030(4) 
C6_31 0.052(4) 0.057(4) 0.041(4) -0.001(3) -0.006(3) 0.031(3) 
O6_31 0.053(3) 0.060(3) 0.033(2) -0.0026(19) -0.0039(18) 0.027(2) 
N1_32 0.055(3) 0.060(3) 0.031(3) 0.001(2) -0.001(2) 0.027(3) 
C1A_32 0.059(4) 0.064(4) 0.041(4) 0.004(3) -0.002(3) 0.025(3) 
C2_32 0.065(5) 0.100(7) 0.045(4) 0.015(4) 0.009(4) 0.026(5) 
C3_32 0.095(8) 0.092(8) 0.093(8) 0.012(6) 0.029(7) 0.019(6) 
C4_32 0.113(9) 0.103(8) 0.085(8) 0.014(6) 0.020(7) 0.052(7) 
C5_32 0.148(15) 0.151(15) 0.125(14) -0.011(12) 0.036(12) 0.021(12) 
C6_32 0.051(4) 0.072(5) 0.031(3) -0.001(3) -0.001(3) 0.023(3) 
O6_32 0.063(3) 0.084(4) 0.038(3) 0.000(3) -0.005(2) 0.025(3) 
N1_33 0.052(3) 0.072(4) 0.036(3) 0.003(3) 0.003(2) 0.028(3) 
C1A_33 0.052(4) 0.092(6) 0.041(4) 0.009(4) 0.002(3) 0.038(4) 
C2_33 0.065(5) 0.102(6) 0.050(4) 0.016(4) 0.006(3) 0.053(5) 
C3_33 0.067(5) 0.106(7) 0.054(5) 0.008(4) 0.003(4) 0.048(5) 
O3_33 0.083(4) 0.107(5) 0.069(4) 0.003(3) 0.000(3) 0.060(4) 
C4_33 0.071(5) 0.114(8) 0.063(5) 0.015(5) 0.013(4) 0.053(5) 
C5_33 0.063(5) 0.109(7) 0.062(5) 0.013(5) 0.000(4) 0.046(5) 
C6_33 0.055(4) 0.089(6) 0.040(4) 0.008(4) 0.001(3) 0.037(4) 
O6_33 0.078(4) 0.169(8) 0.052(4) 0.009(4) -0.004(3) 0.066(5) 
C7_33 0.096(8) 0.132(10) 0.093(8) -0.010(7) 0.012(6) 0.068(8) 
N1_34 0.044(3) 0.056(3) 0.034(3) 0.002(2) -0.001(2) 0.022(2) 
C1A_34 0.048(3) 0.056(4) 0.035(3) 0.006(3) 0.002(3) 0.024(3) 
C2_34 0.046(3) 0.055(4) 0.041(3) 0.002(3) 0.001(3) 0.023(3) 
C3_34 0.053(4) 0.053(4) 0.044(4) 0.002(3) 0.007(3) 0.022(3) 
C4_34 0.054(4) 0.060(4) 0.060(5) 0.004(3) 0.007(3) 0.019(3) 
C5_34 0.084(6) 0.069(5) 0.066(5) -0.005(4) 0.009(4) 0.036(5) 
C6_34 0.045(3) 0.054(3) 0.028(3) 0.000(3) -0.005(2) 0.021(3) 
O6_34 0.068(3) 0.060(3) 0.042(3) -0.002(2) -0.009(2) 0.029(2) 
N1_35 0.050(3) 0.052(3) 0.035(3) 0.004(2) -0.002(2) 0.022(2) 
C1A_35 0.055(4) 0.058(4) 0.051(4) 0.005(3) -0.006(3) 0.024(3) 
C2_35 0.086(6) 0.075(5) 0.062(5) 0.015(4) -0.010(4) 0.038(5) 
C3_35 0.087(7) 0.073(6) 0.098(8) 0.014(5) -0.011(6) 0.036(5) 
C4_35 0.157(13) 0.113(10) 0.115(11) 0.031(8) -0.025(10) 0.067(10) 
C5_35 0.127(11) 0.086(8) 0.177(15) 0.031(9) -0.003(10) 0.062(8) 
C6_35 0.058(4) 0.052(4) 0.048(4) 0.011(3) -0.002(3) 0.021(3) 
O6_35 0.068(3) 0.056(3) 0.062(3) 0.002(3) -0.005(3) 0.022(3) 
N1_36 0.052(3) 0.062(4) 0.062(4) 0.002(3) -0.002(3) 0.017(3) 
C1A_36 0.060(5) 0.083(6) 0.071(6) 0.000(5) -0.002(4) 0.018(4) 
C2_36 0.071(6) 0.112(8) 0.067(6) 0.005(5) 0.001(5) 0.029(6) 
C3_36 0.108(9) 0.117(10) 0.102(9) 0.003(7) 0.019(7) 0.051(8) 
O3_36 0.107(6) 0.123(7) 0.109(7) -0.003(5) 0.016(5) 0.040(5) 
C4_36 0.139(11) 0.072(6) 0.097(9) -0.001(6) -0.009(7) 0.048(7) 
C5_36 0.076(6) 0.076(6) 0.112(9) 0.005(6) 0.022(6) 0.017(5) 
C6_36 0.067(5) 0.082(6) 0.077(6) 0.000(5) -0.006(5) 0.015(5) 
O6_36 0.129(8) 0.131(8) 0.125(8) -0.020(6) -0.021(6) 0.052(7) 
C7_36 0.169(15) 0.167(15) 0.103(11) 0.015(10) 0.063(11) 0.067(12) 
O8_36 0.117(6) 0.099(6) 0.101(6) 0.000(5) -0.013(5) 0.052(5) 
C8_36 0.136(12) 0.137(12) 0.115(11) 0.011(9) -0.006(9) 0.069(10) 
 
_geom_special_details 
; 
 All esds (except the esd in the dihedral angle between two l.s. planes) 
 are estimated using the full covariance matrix.  The cell esds are taken 
 into account individually in the estimation of esds in distances, angles 
 and torsion angles; correlations between esds in cell parameters are only 
 used when they are defined by crystal symmetry.  An approximate (isotropic) 
 treatment of cell esds is used for estimating esds involving l.s. planes. 
; 
 
loop_ 
 _geom_bond_atom_site_label_1 
 _geom_bond_atom_site_label_2 
 _geom_bond_distance 
 _geom_bond_site_symmetry_2 
 _geom_bond_publ_flag 
O1_10 C5_10 1.344(7) . ? 
O1_10 C11_10 1.479(8) . ? 
C11_10 C3_10 1.508(11) . ? 
C11_10 C2_10 1.522(11) . ? 
C11_10 C4_10 1.523(12) . ? 
C2_10 H2A_10 0.9600 . ? 
C2_10 H2B_10 0.9600 . ? 
C2_10 H2C_10 0.9600 . ? 
C3_10 H3A_10 0.9600 . ? 
C3_10 H3B_10 0.9600 . ? 
C3_10 H3C_10 0.9600 . ? 
C4_10 H4A_10 0.9600 . ? 
C4_10 H4B_10 0.9600 . ? 
C4_10 H4C_10 0.9600 . ? 
C5_10 O5_10 1.211(8) . ? 
C5_10 N1_11 1.379(8) . ? 
N1_11 C1A_11 1.424(8) . ? 
N1_11 H1_11 0.8600 . ? 
C1A_11 C6_11 1.511(9) . ? 
C1A_11 C2_11 1.548(9) . ? 
C1A_11 H1A_11 0.9800 . ? 
C2_11 C3_11 1.504(10) . ? 
C2_11 H2A_11 0.9700 . ? 
C2_11 H2B_11 0.9700 . ? 
C3_11 C4_11 1.505(12) . ? 
C3_11 C5_11 1.536(11) . ? 
C3_11 H3_11 0.9800 . ? 
C4_11 H4A_11 0.9600 . ? 
C4_11 H4B_11 0.9600 . ? 
C4_11 H4C_11 0.9600 . ? 
C5_11 H5A_11 0.9600 . ? 
C5_11 H5B_11 0.9600 . ? 
C5_11 H5C_11 0.9600 . ? 
C6_11 O6_11 1.245(7) . ? 
C6_11 N1_12 1.353(8) . ? 
N1_12 C1A_12 1.443(10) . ? 
N1_12 H1_12 0.8600 . ? 
C1A_12 C6_12 1.517(12) . ? 
C1A_12 C2_12 1.548(13) . ? 
C1A_12 H1A_12 0.9800 . ? 
C2_12 C3_12 1.592(17) . ? 
C2_12 H2A_12 0.9700 . ? 
C2_12 H2B_12 0.9700 . ? 
C3_12 C5_12 1.451(18) . ? 
C3_12 C4_12 1.566(18) . ? 
C3_12 H3_12 0.9800 . ? 
C4_12 H4A_12 0.9600 . ? 
C4_12 H4B_12 0.9600 . ? 
C4_12 H4C_12 0.9600 . ? 
C5_12 H5A_12 0.9600 . ? 
C5_12 H5B_12 0.9600 . ? 
C5_12 H5C_12 0.9600 . ? 
C6_12 O6_12 1.228(9) . ? 
C6_12 N1_13 1.332(11) . ? 
N1_13 C1A_13 1.453(11) . ? 
N1_13 H1_13 0.8600 . ? 
C1A_13 C2_13 1.527(15) . ? 
C1A_13 C6_13 1.536(12) . ? 
C1A_13 C5_13 1.548(15) . ? 
C2_13 C3_13 1.543(5) . ? 
C2_13 H2A_13 0.9700 . ? 
C2_13 H2B_13 0.9700 . ? 
C3_13 O3_13 1.454(15) . ? 
C3_13 C4_13 1.540(5) . ? 
C3_13 H3_13 0.9800 . ? 
O3_13 C7_13 1.455(17) . ? 
C4_13 C5_13 1.539(5) . ? 
C4_13 H4A_13 0.9700 . ? 
C4_13 H4B_13 0.9700 . ? 
C5_13 H5A_13 0.9700 . ? 
C5_13 H5B_13 0.9700 . ? 
C6_13 O6_13 1.184(9) . ? 
C6_13 N1_14 1.373(11) . ? 
C7_13 H7A_13 0.9600 . ? 
C7_13 H7B_13 0.9600 . ? 
C7_13 H7C_13 0.9600 . ? 
N1_14 C1A_14 1.440(10) . ? 
N1_14 H1_14 0.8600 . ? 
C1A_14 C6_14 1.511(10) . ? 
C1A_14 C2_14 1.549(12) . ? 
C1A_14 H1A_14 0.9800 . ? 
C2_14 C3_14 1.547(12) . ? 
C2_14 H2A_14 0.9700 . ? 
C2_14 H2B_14 0.9700 . ? 
C3_14 C4_14 1.519(14) . ? 
C3_14 C5_14 1.56(2) . ? 
C3_14 H3_14 0.9800 . ? 
C4_14 H4A_14 0.9600 . ? 
C4_14 H4B_14 0.9600 . ? 
C4_14 H4C_14 0.9600 . ? 
C5_14 H5A_14 0.9600 . ? 
C5_14 H5B_14 0.9600 . ? 
C5_14 H5C_14 0.9600 . ? 
C6_14 O6_14 1.220(8) . ? 
C6_14 N1_15 1.337(8) . ? 
N1_15 C1A_15 1.456(8) . ? 
N1_15 H1_15 0.8600 . ? 
C1A_15 C6_15 1.508(8) . ? 
C1A_15 C2_15 1.555(8) . ? 
C1A_15 H1A_15 0.9800 . ? 
C2_15 C3_15 1.532(9) . ? 
C2_15 H2A_15 0.9700 . ? 
C2_15 H2B_15 0.9700 . ? 
C3_15 C5_15 1.507(10) . ? 
C3_15 C4_15 1.545(11) . ? 
C3_15 H3_15 0.9800 . ? 
C4_15 H4A_15 0.9600 . ? 
C4_15 H4B_15 0.9600 . ? 
C4_15 H4C_15 0.9600 . ? 
C5_15 H5A_15 0.9600 . ? 
C5_15 H5B_15 0.9600 . ? 
C5_15 H5C_15 0.9600 . ? 
C6_15 O6_15 1.253(7) . ? 
C6_15 N1_16 1.335(9) . ? 
N1_16 C1A_16 1.466(9) . ? 
N1_16 H1_16 0.8600 . ? 
C1A_16 C6_16 1.498(11) . ? 
C1A_16 C5_16 1.549(11) . ? 
C1A_16 C2_16 1.575(11) . ? 
C2_16 C3_16 1.546(16) . ? 
C2_16 H2A_16 0.9700 . ? 
C2_16 H2B_16 0.9700 . ? 
C3_16 O3_16 1.451(15) . ? 
C3_16 C4_16 1.541(5) . ? 
C3_16 H3_16 0.9800 . ? 
O3_16 C7_16 1.443(17) . ? 
C4_16 C5_16 1.543(5) . ? 
C4_16 H4A_16 0.9700 . ? 
C4_16 H4B_16 0.9700 . ? 
C5_16 H5A_16 0.9700 . ? 
C5_16 H5B_16 0.9700 . ? 
C6_16 O6_16 1.224(9) . ? 
C6_16 O8_16 1.325(9) . ? 
C7_16 H7A_16 0.9600 . ? 
C7_16 H7B_16 0.9600 . ? 
C7_16 H7C_16 0.9600 . ? 
O8_16 C8_16 1.471(10) . ? 
C8_16 H8A_16 0.9600 . ? 
C8_16 H8B_16 0.9600 . ? 
C8_16 H8C_16 0.9600 . ? 
O1_20 C5_20 1.328(8) . ? 
O1_20 C12_20 1.478(9) . ? 
C12_20 C4_20 1.511(16) . ? 
C12_20 C3_20 1.517(14) . ? 
C12_20 C2_20 1.520(12) . ? 
C2_20 H2A_20 0.9600 . ? 
C2_20 H2B_20 0.9600 . ? 
C2_20 H2C_20 0.9600 . ? 
C3_20 H3A_20 0.9600 . ? 
C3_20 H3B_20 0.9600 . ? 
C3_20 H3C_20 0.9600 . ? 
C4_20 H4A_20 0.9600 . ? 
C4_20 H4B_20 0.9600 . ? 
C4_20 H4C_20 0.9600 . ? 
C5_20 O5_20 1.235(8) . ? 
C5_20 N1_21 1.353(8) . ? 
N1_21 C1A_21 1.436(8) . ? 
N1_21 H1_21 0.8600 . ? 
C1A_21 C6_21 1.513(10) . ? 
C1A_21 C2_21 1.540(10) . ? 
C1A_21 H1A_21 0.9800 . ? 
C2_21 C3_21 1.516(15) . ? 
C2_21 H2A_21 0.9700 . ? 
C2_21 H2B_21 0.9700 . ? 
C3_21 C4_21 1.507(16) . ? 
C3_21 C5_21 1.583(19) . ? 
C3_21 H3_21 0.9800 . ? 
C4_21 H4A_21 0.9600 . ? 
C4_21 H4B_21 0.9600 . ? 
C4_21 H4C_21 0.9600 . ? 
C5_21 H5A_21 0.9600 . ? 
C5_21 H5B_21 0.9600 . ? 
C5_21 H5C_21 0.9600 . ? 
C6_21 O6_21 1.251(8) . ? 
C6_21 N1_22 1.340(8) . ? 
N1_22 C1A_22 1.452(8) . ? 
N1_22 H1_22 0.8600 . ? 
C1A_22 C6_22 1.506(9) . ? 
C1A_22 C2_22 1.519(9) . ? 
C1A_22 H1A_22 0.9800 . ? 
C2_22 C3_22 1.531(10) . ? 
C2_22 H2A_22 0.9700 . ? 
C2_22 H2B_22 0.9700 . ? 
C3_22 C5_22 1.537(10) . ? 
C3_22 C4_22 1.548(12) . ? 
C3_22 H3_22 0.9800 . ? 
C4_22 H4A_22 0.9600 . ? 
C4_22 H4B_22 0.9600 . ? 
C4_22 H4C_22 0.9600 . ? 
C5_22 H5A_22 0.9600 . ? 
C5_22 H5B_22 0.9600 . ? 
C5_22 H5C_22 0.9600 . ? 
C6_22 O6_22 1.240(8) . ? 
C6_22 N1_23 1.357(8) . ? 
N1_23 C1A_23 1.470(8) . ? 
N1_23 H1_23 0.8600 . ? 
C1A_23 C5_23 1.519(10) . ? 
C1A_23 C6_23 1.540(9) . ? 
C1A_23 C2_23 1.561(9) . ? 
C2_23 C3_23 1.541(10) . ? 
C2_23 H2A_23 0.9700 . ? 
C2_23 H2B_23 0.9700 . ? 
C3_23 O3_23 1.444(8) . ? 
C3_23 C4_23 1.503(11) . ? 
C3_23 H3_23 0.9800 . ? 
O3_23 C7_23 1.435(13) . ? 
C4_23 C5_23 1.554(11) . ? 
C4_23 H4A_23 0.9700 . ? 
C4_23 H4B_23 0.9700 . ? 
C5_23 H5A_23 0.9700 . ? 
C5_23 H5B_23 0.9700 . ? 
C6_23 O6_23 1.221(8) . ? 
C6_23 N1_24 1.349(10) . ? 
C7_23 H7A_23 0.9600 . ? 
C7_23 H7B_23 0.9600 . ? 
C7_23 H7C_23 0.9600 . ? 
N1_24 C1A_24 1.463(8) . ? 
N1_24 H1_24 0.8600 . ? 
C1A_24 C6_24 1.512(10) . ? 
C1A_24 C2_24 1.520(14) . ? 
C1A_24 H1A_24 0.9800 . ? 
C2_24 C3_24 1.608(16) . ? 
C2_24 H2A_24 0.9700 . ? 
C2_24 H2B_24 0.9700 . ? 
C3_24 C5_24 1.426(19) . ? 
C3_24 C4_24 1.523(19) . ? 
C3_24 H3_24 0.9800 . ? 
C4_24 H4A_24 0.9600 . ? 
C4_24 H4B_24 0.9600 . ? 
C4_24 H4C_24 0.9600 . ? 
C5_24 H5A_24 0.9600 . ? 
C5_24 H5B_24 0.9600 . ? 
C5_24 H5C_24 0.9600 . ? 
C6_24 O6_24 1.240(8) . ? 
C6_24 N1_25 1.335(8) . ? 
N1_25 C1A_25 1.436(8) . ? 
N1_25 H1_25 0.8600 . ? 
C1A_25 C6_25 1.525(9) . ? 
C1A_25 C2_25 1.559(9) . ? 
C1A_25 H1A_25 0.9800 . ? 
C2_25 C3_25 1.523(10) . ? 
C2_25 H2A_25 0.9700 . ? 
C2_25 H2B_25 0.9700 . ? 
C3_25 C4_25 1.512(12) . ? 
C3_25 C5_25 1.541(12) . ? 
C3_25 H3_25 0.9800 . ? 
C4_25 H4A_25 0.9600 . ? 
C4_25 H4B_25 0.9600 . ? 
C4_25 H4C_25 0.9600 . ? 
C5_25 H5A_25 0.9600 . ? 
C5_25 H5B_25 0.9600 . ? 
C5_25 H5C_25 0.9600 . ? 
C6_25 O6_25 1.241(8) . ? 
C6_25 N1_26 1.335(9) . ? 
N1_26 C1A_26 1.464(10) . ? 
N1_26 H1_26 0.8600 . ? 
C1A_26 C6_26 1.495(14) . ? 
C1A_26 C5_26 1.524(11) . ? 
C1A_26 C2_26 1.543(13) . ? 
C2_26 C3_26 1.548(14) . ? 
C2_26 H2A_26 0.9700 . ? 
C2_26 H2B_26 0.9700 . ? 
C3_26 O3_26 1.447(11) . ? 
C3_26 C4_26 1.556(15) . ? 
C3_26 H3_26 0.9800 . ? 
O3_26 C7_26 1.427(13) . ? 
C4_26 C5_26 1.516(17) . ? 
C4_26 H4A_26 0.9700 . ? 
C4_26 H4B_26 0.9700 . ? 
C5_26 H5A_26 0.9700 . ? 
C5_26 H5B_26 0.9700 . ? 
C6_26 O6_26 1.236(11) . ? 
C6_26 O8_26 1.339(13) . ? 
C7_26 H7A_26 0.9600 . ? 
C7_26 H7B_26 0.9600 . ? 
C7_26 H7C_26 0.9600 . ? 
O8_26 C8_26 1.442(13) . ? 
C8_26 H8A_26 0.9600 . ? 
C8_26 H8B_26 0.9600 . ? 
C8_26 H8C_26 0.9600 . ? 
O1_30 C5_30 1.333(9) . ? 
O1_30 C13_30 1.471(9) . ? 
C13_30 C3_30 1.494(13) . ? 
C13_30 C4_30 1.497(14) . ? 
C13_30 C2_30 1.534(14) . ? 
C2_30 H2A_30 0.9600 . ? 
C2_30 H2B_30 0.9600 . ? 
C2_30 H2C_30 0.9600 . ? 
C3_30 H3A_30 0.9600 . ? 
C3_30 H3B_30 0.9600 . ? 
C3_30 H3C_30 0.9600 . ? 
C4_30 H4A_30 0.9600 . ? 
C4_30 H4B_30 0.9600 . ? 
C4_30 H4C_30 0.9600 . ? 
C5_30 O5_30 1.222(9) . ? 
C5_30 N1_31 1.352(9) . ? 
N1_31 C1A_31 1.454(9) . ? 
N1_31 H1_31 0.8600 . ? 
C1A_31 C6_31 1.530(10) . ? 
C1A_31 C2_31 1.539(9) . ? 
C1A_31 H1A_31 0.9800 . ? 
C2_31 C3_31 1.533(11) . ? 
C2_31 H2A_31 0.9700 . ? 
C2_31 H2B_31 0.9700 . ? 
C3_31 C5_31 1.522(13) . ? 
C3_31 C4_31 1.543(13) . ? 
C3_31 H3_31 0.9800 . ? 
C4_31 H4A_31 0.9600 . ? 
C4_31 H4B_31 0.9600 . ? 
C4_31 H4C_31 0.9600 . ? 
C5_31 H5A_31 0.9600 . ? 
C5_31 H5B_31 0.9600 . ? 
C5_31 H5C_31 0.9600 . ? 
C6_31 O6_31 1.257(8) . ? 
C6_31 N1_32 1.314(9) . ? 
N1_32 C1A_32 1.500(10) . ? 
N1_32 H1_32 0.8600 . ? 
C1A_32 C6_32 1.496(11) . ? 
C1A_32 C2_32 1.569(11) . ? 
C1A_32 H1A_32 0.9800 . ? 
C2_32 C3_32 1.462(17) . ? 
C2_32 H2A_32 0.9700 . ? 
C2_32 H2B_32 0.9700 . ? 
C3_32 C5_32 1.50(2) . ? 
C3_32 C4_32 1.53(2) . ? 
C3_32 H3_32 0.9800 . ? 
C4_32 H4A_32 0.9600 . ? 
C4_32 H4B_32 0.9600 . ? 
C4_32 H4C_32 0.9600 . ? 
C5_32 H5A_32 0.9600 . ? 
C5_32 H5B_32 0.9600 . ? 
C5_32 H5C_32 0.9600 . ? 
C6_32 O6_32 1.253(9) . ? 
C6_32 N1_33 1.324(11) . ? 
N1_33 C1A_33 1.470(10) . ? 
N1_33 H1_33 0.8600 . ? 
C1A_33 C5_33 1.528(11) . ? 
C1A_33 C6_33 1.537(11) . ? 
C1A_33 C2_33 1.560(13) . ? 
C2_33 C3_33 1.558(11) . ? 
C2_33 H2A_33 0.9700 . ? 
C2_33 H2B_33 0.9700 . ? 
C3_33 O3_33 1.425(10) . ? 
C3_33 C4_33 1.531(14) . ? 
C3_33 H3_33 0.9800 . ? 
O3_33 C7_33 1.454(11) . ? 
C4_33 C5_33 1.562(14) . ? 
C4_33 H4A_33 0.9700 . ? 
C4_33 H4B_33 0.9700 . ? 
C5_33 H5A_33 0.9700 . ? 
C5_33 H5B_33 0.9700 . ? 
C6_33 O6_33 1.197(10) . ? 
C6_33 N1_34 1.357(10) . ? 
C7_33 H7A_33 0.9600 . ? 
C7_33 H7B_33 0.9600 . ? 
C7_33 H7C_33 0.9600 . ? 
N1_34 C1A_34 1.453(9) . ? 
N1_34 H1_34 0.8600 . ? 
C1A_34 C6_34 1.538(10) . ? 
C1A_34 C2_34 1.547(9) . ? 
C1A_34 H1A_34 0.9800 . ? 
C2_34 C3_34 1.509(10) . ? 
C2_34 H2A_34 0.9700 . ? 
C2_34 H2B_34 0.9700 . ? 
C3_34 C5_34 1.512(11) . ? 
C3_34 C4_34 1.513(10) . ? 
C3_34 H3_34 0.9800 . ? 
C4_34 H4A_34 0.9600 . ? 
C4_34 H4B_34 0.9600 . ? 
C4_34 H4C_34 0.9600 . ? 
C5_34 H5A_34 0.9600 . ? 
C5_34 H5B_34 0.9600 . ? 
C5_34 H5C_34 0.9600 . ? 
C6_34 O6_34 1.233(8) . ? 
C6_34 N1_35 1.330(8) . ? 
N1_35 C1A_35 1.439(10) . ? 
N1_35 H1_35 0.8600 . ? 
C1A_35 C2_35 1.533(11) . ? 
C1A_35 C6_35 1.551(11) . ? 
C1A_35 H1A_35 0.9800 . ? 
C2_35 C3_35 1.472(15) . ? 
C2_35 H2A_35 0.9700 . ? 
C2_35 H2B_35 0.9700 . ? 
C3_35 C5_35 1.53(2) . ? 
C3_35 C4_35 1.573(17) . ? 
C3_35 H3_35 0.9800 . ? 
C4_35 H4A_35 0.9600 . ? 
C4_35 H4B_35 0.9600 . ? 
C4_35 H4C_35 0.9600 . ? 
C5_35 H5A_35 0.9600 . ? 
C5_35 H5B_35 0.9600 . ? 
C5_35 H5C_35 0.9600 . ? 
C6_35 O6_35 1.237(10) . ? 
C6_35 N1_36 1.339(11) . ? 
N1_36 C1A_36 1.445(11) . ? 
N1_36 H1_36 0.8600 . ? 
C1A_36 C6_36 1.498(15) . ? 
C1A_36 C2_36 1.534(16) . ? 
C1A_36 C5_36 1.571(15) . ? 
C2_36 C3_36 1.597(17) . ? 
C2_36 H2A_36 0.9700 . ? 
C2_36 H2B_36 0.9700 . ? 
C3_36 O3_36 1.443(13) . ? 
C3_36 C4_36 1.641(19) . ? 
C3_36 H3_36 0.9800 . ? 
O3_36 C7_36 1.454(14) . ? 
C4_36 C5_36 1.407(17) . ? 
C4_36 H4A_36 0.9700 . ? 
C4_36 H4B_36 0.9700 . ? 
C5_36 H5A_36 0.9700 . ? 
C5_36 H5B_36 0.9700 . ? 
C6_36 O6_36 1.257(14) . ? 
C6_36 O8_36 1.275(14) . ? 
C7_36 H7A_36 0.9600 . ? 
C7_36 H7B_36 0.9600 . ? 
C7_36 H7C_36 0.9600 . ? 
O8_36 C8_36 1.455(14) . ? 
C8_36 H8A_36 0.9600 . ? 
C8_36 H8B_36 0.9600 . ? 
C8_36 H8C_36 0.9600 . ? 
 
loop_ 
 _geom_angle_atom_site_label_1 
 _geom_angle_atom_site_label_2 
 _geom_angle_atom_site_label_3 
 _geom_angle 
 _geom_angle_site_symmetry_1 
 _geom_angle_site_symmetry_3 
 _geom_angle_publ_flag 
C5_10 O1_10 C11_10 120.1(5) . . ? 
O1_10 C11_10 C3_10 109.6(6) . . ? 
O1_10 C11_10 C2_10 102.6(6) . . ? 
C3_10 C11_10 C2_10 109.5(7) . . ? 
O1_10 C11_10 C4_10 110.4(6) . . ? 
C3_10 C11_10 C4_10 112.7(7) . . ? 
C2_10 C11_10 C4_10 111.6(7) . . ? 
C11_10 C2_10 H2A_10 109.5 . . ? 
C11_10 C2_10 H2B_10 109.5 . . ? 
H2A_10 C2_10 H2B_10 109.5 . . ? 
C11_10 C2_10 H2C_10 109.5 . . ? 
H2A_10 C2_10 H2C_10 109.5 . . ? 
H2B_10 C2_10 H2C_10 109.5 . . ? 
C11_10 C3_10 H3A_10 109.5 . . ? 
C11_10 C3_10 H3B_10 109.5 . . ? 
H3A_10 C3_10 H3B_10 109.5 . . ? 
C11_10 C3_10 H3C_10 109.5 . . ? 
H3A_10 C3_10 H3C_10 109.5 . . ? 
H3B_10 C3_10 H3C_10 109.5 . . ? 
C11_10 C4_10 H4A_10 109.5 . . ? 
C11_10 C4_10 H4B_10 109.5 . . ? 
H4A_10 C4_10 H4B_10 109.5 . . ? 
C11_10 C4_10 H4C_10 109.5 . . ? 
H4A_10 C4_10 H4C_10 109.5 . . ? 
H4B_10 C4_10 H4C_10 109.5 . . ? 
O5_10 C5_10 O1_10 125.9(6) . . ? 
O5_10 C5_10 N1_11 122.4(5) . . ? 
O1_10 C5_10 N1_11 111.7(5) . . ? 
C5_10 N1_11 C1A_11 118.7(5) . . ? 
C5_10 N1_11 H1_11 120.7 . . ? 
C1A_11 N1_11 H1_11 120.7 . . ? 
N1_11 C1A_11 C6_11 113.5(5) . . ? 
N1_11 C1A_11 C2_11 110.3(5) . . ? 
C6_11 C1A_11 C2_11 108.5(5) . . ? 
N1_11 C1A_11 H1A_11 108.1 . . ? 
C6_11 C1A_11 H1A_11 108.1 . . ? 
C2_11 C1A_11 H1A_11 108.1 . . ? 
C3_11 C2_11 C1A_11 114.7(6) . . ? 
C3_11 C2_11 H2A_11 108.6 . . ? 
C1A_11 C2_11 H2A_11 108.6 . . ? 
C3_11 C2_11 H2B_11 108.6 . . ? 
C1A_11 C2_11 H2B_11 108.6 . . ? 
H2A_11 C2_11 H2B_11 107.6 . . ? 
C2_11 C3_11 C4_11 113.3(6) . . ? 
C2_11 C3_11 C5_11 107.4(6) . . ? 
C4_11 C3_11 C5_11 111.2(7) . . ? 
C2_11 C3_11 H3_11 108.3 . . ? 
C4_11 C3_11 H3_11 108.3 . . ? 
C5_11 C3_11 H3_11 108.3 . . ? 
C3_11 C4_11 H4A_11 109.5 . . ? 
C3_11 C4_11 H4B_11 109.5 . . ? 
H4A_11 C4_11 H4B_11 109.5 . . ? 
C3_11 C4_11 H4C_11 109.5 . . ? 
H4A_11 C4_11 H4C_11 109.5 . . ? 
H4B_11 C4_11 H4C_11 109.5 . . ? 
C3_11 C5_11 H5A_11 109.5 . . ? 
C3_11 C5_11 H5B_11 109.5 . . ? 
H5A_11 C5_11 H5B_11 109.5 . . ? 
C3_11 C5_11 H5C_11 109.5 . . ? 
H5A_11 C5_11 H5C_11 109.5 . . ? 
H5B_11 C5_11 H5C_11 109.5 . . ? 
O6_11 C6_11 N1_12 120.2(6) . . ? 
O6_11 C6_11 C1A_11 119.4(5) . . ? 
N1_12 C6_11 C1A_11 120.4(5) . . ? 
C6_11 N1_12 C1A_12 117.7(5) . . ? 
C6_11 N1_12 H1_12 121.1 . . ? 
C1A_12 N1_12 H1_12 121.1 . . ? 
N1_12 C1A_12 C6_12 113.4(6) . . ? 
N1_12 C1A_12 C2_12 113.5(8) . . ? 
C6_12 C1A_12 C2_12 106.8(7) . . ? 
N1_12 C1A_12 H1A_12 107.6 . . ? 
C6_12 C1A_12 H1A_12 107.6 . . ? 
C2_12 C1A_12 H1A_12 107.6 . . ? 
C1A_12 C2_12 C3_12 109.4(9) . . ? 
C1A_12 C2_12 H2A_12 109.8 . . ? 
C3_12 C2_12 H2A_12 109.8 . . ? 
C1A_12 C2_12 H2B_12 109.8 . . ? 
C3_12 C2_12 H2B_12 109.8 . . ? 
H2A_12 C2_12 H2B_12 108.2 . . ? 
C5_12 C3_12 C4_12 111.0(12) . . ? 
C5_12 C3_12 C2_12 119.4(10) . . ? 
C4_12 C3_12 C2_12 102.8(11) . . ? 
C5_12 C3_12 H3_12 107.7 . . ? 
C4_12 C3_12 H3_12 107.7 . . ? 
C2_12 C3_12 H3_12 107.7 . . ? 
C3_12 C4_12 H4A_12 109.5 . . ? 
C3_12 C4_12 H4B_12 109.5 . . ? 
H4A_12 C4_12 H4B_12 109.5 . . ? 
C3_12 C4_12 H4C_12 109.5 . . ? 
H4A_12 C4_12 H4C_12 109.5 . . ? 
H4B_12 C4_12 H4C_12 109.5 . . ? 
C3_12 C5_12 H5A_12 109.5 . . ? 
C3_12 C5_12 H5B_12 109.5 . . ? 
H5A_12 C5_12 H5B_12 109.5 . . ? 
C3_12 C5_12 H5C_12 109.5 . . ? 
H5A_12 C5_12 H5C_12 109.5 . . ? 
H5B_12 C5_12 H5C_12 109.5 . . ? 
O6_12 C6_12 N1_13 122.6(8) . . ? 
O6_12 C6_12 C1A_12 119.2(8) . . ? 
N1_13 C6_12 C1A_12 118.2(6) . . ? 
C6_12 N1_13 C1A_13 119.4(7) . . ? 
C6_12 N1_13 H1_13 120.3 . . ? 
C1A_13 N1_13 H1_13 120.3 . . ? 
N1_13 C1A_13 C2_13 109.8(7) . . ? 
N1_13 C1A_13 C6_13 111.5(7) . . ? 
C2_13 C1A_13 C6_13 111.5(8) . . ? 
N1_13 C1A_13 C5_13 112.1(9) . . ? 
C2_13 C1A_13 C5_13 100.6(8) . . ? 
C6_13 C1A_13 C5_13 110.9(7) . . ? 
C1A_13 C2_13 C3_13 103.7(9) . . ? 
C1A_13 C2_13 H2A_13 111.0 . . ? 
C3_13 C2_13 H2A_13 111.0 . . ? 
C1A_13 C2_13 H2B_13 111.0 . . ? 
C3_13 C2_13 H2B_13 111.0 . . ? 
H2A_13 C2_13 H2B_13 109.0 . . ? 
O3_13 C3_13 C4_13 106.2(14) . . ? 
O3_13 C3_13 C2_13 112.1(12) . . ? 
C4_13 C3_13 C2_13 111.4(10) . . ? 
O3_13 C3_13 H3_13 109.0 . . ? 
C4_13 C3_13 H3_13 109.0 . . ? 
C2_13 C3_13 H3_13 109.0 . . ? 
C3_13 O3_13 C7_13 122.3(19) . . ? 
C5_13 C4_13 C3_13 93.5(11) . . ? 
C5_13 C4_13 H4A_13 113.0 . . ? 
C3_13 C4_13 H4A_13 113.0 . . ? 
C5_13 C4_13 H4B_13 113.0 . . ? 
C3_13 C4_13 H4B_13 113.0 . . ? 
H4A_13 C4_13 H4B_13 110.4 . . ? 
C4_13 C5_13 C1A_13 106.9(10) . . ? 
C4_13 C5_13 H5A_13 110.3 . . ? 
C1A_13 C5_13 H5A_13 110.3 . . ? 
C4_13 C5_13 H5B_13 110.3 . . ? 
C1A_13 C5_13 H5B_13 110.3 . . ? 
H5A_13 C5_13 H5B_13 108.6 . . ? 
O6_13 C6_13 N1_14 122.5(8) . . ? 
O6_13 C6_13 C1A_13 122.9(8) . . ? 
N1_14 C6_13 C1A_13 114.1(6) . . ? 
O3_13 C7_13 H7A_13 109.5 . . ? 
O3_13 C7_13 H7B_13 109.5 . . ? 
H7A_13 C7_13 H7B_13 109.5 . . ? 
O3_13 C7_13 H7C_13 109.5 . . ? 
H7A_13 C7_13 H7C_13 109.5 . . ? 
H7B_13 C7_13 H7C_13 109.5 . . ? 
C6_13 N1_14 C1A_14 121.7(6) . . ? 
C6_13 N1_14 H1_14 119.1 . . ? 
C1A_14 N1_14 H1_14 119.1 . . ? 
N1_14 C1A_14 C6_14 114.1(6) . . ? 
N1_14 C1A_14 C2_14 109.4(6) . . ? 
C6_14 C1A_14 C2_14 107.4(6) . . ? 
N1_14 C1A_14 H1A_14 108.6 . . ? 
C6_14 C1A_14 H1A_14 108.6 . . ? 
C2_14 C1A_14 H1A_14 108.6 . . ? 
C3_14 C2_14 C1A_14 111.9(7) . . ? 
C3_14 C2_14 H2A_14 109.2 . . ? 
C1A_14 C2_14 H2A_14 109.2 . . ? 
C3_14 C2_14 H2B_14 109.2 . . ? 
C1A_14 C2_14 H2B_14 109.2 . . ? 
H2A_14 C2_14 H2B_14 107.9 . . ? 
C4_14 C3_14 C2_14 109.6(8) . . ? 
C4_14 C3_14 C5_14 112.0(11) . . ? 
C2_14 C3_14 C5_14 110.6(10) . . ? 
C4_14 C3_14 H3_14 108.2 . . ? 
C2_14 C3_14 H3_14 108.2 . . ? 
C5_14 C3_14 H3_14 108.2 . . ? 
C3_14 C4_14 H4A_14 109.5 . . ? 
C3_14 C4_14 H4B_14 109.5 . . ? 
H4A_14 C4_14 H4B_14 109.5 . . ? 
C3_14 C4_14 H4C_14 109.5 . . ? 
H4A_14 C4_14 H4C_14 109.5 . . ? 
H4B_14 C4_14 H4C_14 109.5 . . ? 
C3_14 C5_14 H5A_14 109.5 . . ? 
C3_14 C5_14 H5B_14 109.5 . . ? 
H5A_14 C5_14 H5B_14 109.5 . . ? 
C3_14 C5_14 H5C_14 109.5 . . ? 
H5A_14 C5_14 H5C_14 109.5 . . ? 
H5B_14 C5_14 H5C_14 109.5 . . ? 
O6_14 C6_14 N1_15 120.6(6) . . ? 
O6_14 C6_14 C1A_14 121.9(6) . . ? 
N1_15 C6_14 C1A_14 117.5(5) . . ? 
C6_14 N1_15 C1A_15 120.2(5) . . ? 
C6_14 N1_15 H1_15 119.9 . . ? 
C1A_15 N1_15 H1_15 119.9 . . ? 
N1_15 C1A_15 C6_15 112.1(5) . . ? 
N1_15 C1A_15 C2_15 110.0(5) . . ? 
C6_15 C1A_15 C2_15 110.4(5) . . ? 
N1_15 C1A_15 H1A_15 108.1 . . ? 
C6_15 C1A_15 H1A_15 108.1 . . ? 
C2_15 C1A_15 H1A_15 108.1 . . ? 
C3_15 C2_15 C1A_15 113.5(5) . . ? 
C3_15 C2_15 H2A_15 108.9 . . ? 
C1A_15 C2_15 H2A_15 108.9 . . ? 
C3_15 C2_15 H2B_15 108.9 . . ? 
C1A_15 C2_15 H2B_15 108.9 . . ? 
H2A_15 C2_15 H2B_15 107.7 . . ? 
C5_15 C3_15 C2_15 111.3(6) . . ? 
C5_15 C3_15 C4_15 111.1(6) . . ? 
C2_15 C3_15 C4_15 109.3(6) . . ? 
C5_15 C3_15 H3_15 108.4 . . ? 
C2_15 C3_15 H3_15 108.4 . . ? 
C4_15 C3_15 H3_15 108.4 . . ? 
C3_15 C4_15 H4A_15 109.5 . . ? 
C3_15 C4_15 H4B_15 109.5 . . ? 
H4A_15 C4_15 H4B_15 109.5 . . ? 
C3_15 C4_15 H4C_15 109.5 . . ? 
H4A_15 C4_15 H4C_15 109.5 . . ? 
H4B_15 C4_15 H4C_15 109.5 . . ? 
C3_15 C5_15 H5A_15 109.5 . . ? 
C3_15 C5_15 H5B_15 109.5 . . ? 
H5A_15 C5_15 H5B_15 109.5 . . ? 
C3_15 C5_15 H5C_15 109.5 . . ? 
H5A_15 C5_15 H5C_15 109.5 . . ? 
H5B_15 C5_15 H5C_15 109.5 . . ? 
O6_15 C6_15 N1_16 122.4(6) . . ? 
O6_15 C6_15 C1A_15 120.6(6) . . ? 
N1_16 C6_15 C1A_15 117.0(5) . . ? 
C6_15 N1_16 C1A_16 120.9(5) . . ? 
C6_15 N1_16 H1_16 119.5 . . ? 
C1A_16 N1_16 H1_16 119.5 . . ? 
N1_16 C1A_16 C6_16 111.0(6) . . ? 
N1_16 C1A_16 C5_16 108.6(6) . . ? 
C6_16 C1A_16 C5_16 107.4(7) . . ? 
N1_16 C1A_16 C2_16 109.6(6) . . ? 
C6_16 C1A_16 C2_16 112.8(6) . . ? 
C5_16 C1A_16 C2_16 107.3(7) . . ? 
C3_16 C2_16 C1A_16 105.2(9) . . ? 
C3_16 C2_16 H2A_16 110.7 . . ? 
C1A_16 C2_16 H2A_16 110.7 . . ? 
C3_16 C2_16 H2B_16 110.7 . . ? 
C1A_16 C2_16 H2B_16 110.7 . . ? 
H2A_16 C2_16 H2B_16 108.8 . . ? 
O3_16 C3_16 C4_16 125(2) . . ? 
O3_16 C3_16 C2_16 109.8(12) . . ? 
C4_16 C3_16 C2_16 105.1(12) . . ? 
O3_16 C3_16 H3_16 105.0 . . ? 
C4_16 C3_16 H3_16 105.0 . . ? 
C2_16 C3_16 H3_16 105.0 . . ? 
C7_16 O3_16 C3_16 113.8(16) . . ? 
C3_16 C4_16 C5_16 104.8(12) . . ? 
C3_16 C4_16 H4A_16 110.8 . . ? 
C5_16 C4_16 H4A_16 110.8 . . ? 
C3_16 C4_16 H4B_16 110.8 . . ? 
C5_16 C4_16 H4B_16 110.8 . . ? 
H4A_16 C4_16 H4B_16 108.9 . . ? 
C4_16 C5_16 C1A_16 102.6(11) . . ? 
C4_16 C5_16 H5A_16 111.2 . . ? 
C1A_16 C5_16 H5A_16 111.2 . . ? 
C4_16 C5_16 H5B_16 111.2 . . ? 
C1A_16 C5_16 H5B_16 111.2 . . ? 
H5A_16 C5_16 H5B_16 109.2 . . ? 
O6_16 C6_16 O8_16 122.6(7) . . ? 
O6_16 C6_16 C1A_16 125.2(7) . . ? 
O8_16 C6_16 C1A_16 111.9(6) . . ? 
O3_16 C7_16 H7A_16 109.5 . . ? 
O3_16 C7_16 H7B_16 109.5 . . ? 
H7A_16 C7_16 H7B_16 109.5 . . ? 
O3_16 C7_16 H7C_16 109.5 . . ? 
H7A_16 C7_16 H7C_16 109.5 . . ? 
H7B_16 C7_16 H7C_16 109.5 . . ? 
C6_16 O8_16 C8_16 116.1(7) . . ? 
O8_16 C8_16 H8A_16 109.5 . . ? 
O8_16 C8_16 H8B_16 109.5 . . ? 
H8A_16 C8_16 H8B_16 109.5 . . ? 
O8_16 C8_16 H8C_16 109.5 . . ? 
H8A_16 C8_16 H8C_16 109.5 . . ? 
H8B_16 C8_16 H8C_16 109.5 . . ? 
C5_20 O1_20 C12_20 121.3(5) . . ? 
O1_20 C12_20 C4_20 112.5(8) . . ? 
O1_20 C12_20 C3_20 107.0(7) . . ? 
C4_20 C12_20 C3_20 113.1(9) . . ? 
O1_20 C12_20 C2_20 102.8(6) . . ? 
C4_20 C12_20 C2_20 114.4(9) . . ? 
C3_20 C12_20 C2_20 106.3(9) . . ? 
C12_20 C2_20 H2A_20 109.5 . . ? 
C12_20 C2_20 H2B_20 109.5 . . ? 
H2A_20 C2_20 H2B_20 109.5 . . ? 
C12_20 C2_20 H2C_20 109.5 . . ? 
H2A_20 C2_20 H2C_20 109.5 . . ? 
H2B_20 C2_20 H2C_20 109.5 . . ? 
C12_20 C3_20 H3A_20 109.5 . . ? 
C12_20 C3_20 H3B_20 109.5 . . ? 
H3A_20 C3_20 H3B_20 109.5 . . ? 
C12_20 C3_20 H3C_20 109.5 . . ? 
H3A_20 C3_20 H3C_20 109.5 . . ? 
H3B_20 C3_20 H3C_20 109.5 . . ? 
C12_20 C4_20 H4A_20 109.5 . . ? 
C12_20 C4_20 H4B_20 109.5 . . ? 
H4A_20 C4_20 H4B_20 109.5 . . ? 
C12_20 C4_20 H4C_20 109.5 . . ? 
H4A_20 C4_20 H4C_20 109.5 . . ? 
H4B_20 C4_20 H4C_20 109.5 . . ? 
O5_20 C5_20 O1_20 125.2(6) . . ? 
O5_20 C5_20 N1_21 122.7(6) . . ? 
O1_20 C5_20 N1_21 112.0(5) . . ? 
C5_20 N1_21 C1A_21 119.8(5) . . ? 
C5_20 N1_21 H1_21 120.1 . . ? 
C1A_21 N1_21 H1_21 120.1 . . ? 
N1_21 C1A_21 C6_21 113.5(5) . . ? 
N1_21 C1A_21 C2_21 111.3(5) . . ? 
C6_21 C1A_21 C2_21 110.6(6) . . ? 
N1_21 C1A_21 H1A_21 107.0 . . ? 
C6_21 C1A_21 H1A_21 107.0 . . ? 
C2_21 C1A_21 H1A_21 107.0 . . ? 
C3_21 C2_21 C1A_21 115.8(8) . . ? 
C3_21 C2_21 H2A_21 108.3 . . ? 
C1A_21 C2_21 H2A_21 108.3 . . ? 
C3_21 C2_21 H2B_21 108.3 . . ? 
C1A_21 C2_21 H2B_21 108.3 . . ? 
H2A_21 C2_21 H2B_21 107.4 . . ? 
C4_21 C3_21 C2_21 112.5(10) . . ? 
C4_21 C3_21 C5_21 109.0(11) . . ? 
C2_21 C3_21 C5_21 105.4(12) . . ? 
C4_21 C3_21 H3_21 109.9 . . ? 
C2_21 C3_21 H3_21 109.9 . . ? 
C5_21 C3_21 H3_21 109.9 . . ? 
C3_21 C4_21 H4A_21 109.5 . . ? 
C3_21 C4_21 H4B_21 109.5 . . ? 
H4A_21 C4_21 H4B_21 109.5 . . ? 
C3_21 C4_21 H4C_21 109.5 . . ? 
H4A_21 C4_21 H4C_21 109.5 . . ? 
H4B_21 C4_21 H4C_21 109.5 . . ? 
C3_21 C5_21 H5A_21 109.5 . . ? 
C3_21 C5_21 H5B_21 109.5 . . ? 
H5A_21 C5_21 H5B_21 109.5 . . ? 
C3_21 C5_21 H5C_21 109.5 . . ? 
H5A_21 C5_21 H5C_21 109.5 . . ? 
H5B_21 C5_21 H5C_21 109.5 . . ? 
O6_21 C6_21 N1_22 121.0(6) . . ? 
O6_21 C6_21 C1A_21 118.1(6) . . ? 
N1_22 C6_21 C1A_21 120.8(5) . . ? 
C6_21 N1_22 C1A_22 119.7(5) . . ? 
C6_21 N1_22 H1_22 120.2 . . ? 
C1A_22 N1_22 H1_22 120.2 . . ? 
N1_22 C1A_22 C6_22 112.1(5) . . ? 
N1_22 C1A_22 C2_22 109.7(5) . . ? 
C6_22 C1A_22 C2_22 112.6(5) . . ? 
N1_22 C1A_22 H1A_22 107.4 . . ? 
C6_22 C1A_22 H1A_22 107.4 . . ? 
C2_22 C1A_22 H1A_22 107.4 . . ? 
C1A_22 C2_22 C3_22 116.0(5) . . ? 
C1A_22 C2_22 H2A_22 108.3 . . ? 
C3_22 C2_22 H2A_22 108.3 . . ? 
C1A_22 C2_22 H2B_22 108.3 . . ? 
C3_22 C2_22 H2B_22 108.3 . . ? 
H2A_22 C2_22 H2B_22 107.4 . . ? 
C2_22 C3_22 C5_22 109.2(6) . . ? 
C2_22 C3_22 C4_22 112.9(6) . . ? 
C5_22 C3_22 C4_22 109.8(7) . . ? 
C2_22 C3_22 H3_22 108.3 . . ? 
C5_22 C3_22 H3_22 108.3 . . ? 
C4_22 C3_22 H3_22 108.3 . . ? 
C3_22 C4_22 H4A_22 109.5 . . ? 
C3_22 C4_22 H4B_22 109.5 . . ? 
H4A_22 C4_22 H4B_22 109.5 . . ? 
C3_22 C4_22 H4C_22 109.5 . . ? 
H4A_22 C4_22 H4C_22 109.5 . . ? 
H4B_22 C4_22 H4C_22 109.5 . . ? 
C3_22 C5_22 H5A_22 109.5 . . ? 
C3_22 C5_22 H5B_22 109.5 . . ? 
H5A_22 C5_22 H5B_22 109.5 . . ? 
C3_22 C5_22 H5C_22 109.5 . . ? 
H5A_22 C5_22 H5C_22 109.5 . . ? 
H5B_22 C5_22 H5C_22 109.5 . . ? 
O6_22 C6_22 N1_23 121.9(5) . . ? 
O6_22 C6_22 C1A_22 121.1(6) . . ? 
N1_23 C6_22 C1A_22 117.0(5) . . ? 
C6_22 N1_23 C1A_23 121.4(5) . . ? 
C6_22 N1_23 H1_23 119.3 . . ? 
C1A_23 N1_23 H1_23 119.3 . . ? 
N1_23 C1A_23 C5_23 111.3(5) . . ? 
N1_23 C1A_23 C6_23 110.9(5) . . ? 
C5_23 C1A_23 C6_23 113.6(6) . . ? 
N1_23 C1A_23 C2_23 108.9(5) . . ? 
C5_23 C1A_23 C2_23 101.8(5) . . ? 
C6_23 C1A_23 C2_23 109.9(5) . . ? 
C3_23 C2_23 C1A_23 105.7(5) . . ? 
C3_23 C2_23 H2A_23 110.6 . . ? 
C1A_23 C2_23 H2A_23 110.6 . . ? 
C3_23 C2_23 H2B_23 110.6 . . ? 
C1A_23 C2_23 H2B_23 110.6 . . ? 
H2A_23 C2_23 H2B_23 108.7 . . ? 
O3_23 C3_23 C4_23 110.8(6) . . ? 
O3_23 C3_23 C2_23 108.3(6) . . ? 
C4_23 C3_23 C2_23 106.1(6) . . ? 
O3_23 C3_23 H3_23 110.5 . . ? 
C4_23 C3_23 H3_23 110.5 . . ? 
C2_23 C3_23 H3_23 110.5 . . ? 
C7_23 O3_23 C3_23 111.1(8) . . ? 
C3_23 C4_23 C5_23 105.3(6) . . ? 
C3_23 C4_23 H4A_23 110.7 . . ? 
C5_23 C4_23 H4A_23 110.7 . . ? 
C3_23 C4_23 H4B_23 110.7 . . ? 
C5_23 C4_23 H4B_23 110.7 . . ? 
H4A_23 C4_23 H4B_23 108.8 . . ? 
C1A_23 C5_23 C4_23 102.1(6) . . ? 
C1A_23 C5_23 H5A_23 111.3 . . ? 
C4_23 C5_23 H5A_23 111.3 . . ? 
C1A_23 C5_23 H5B_23 111.3 . . ? 
C4_23 C5_23 H5B_23 111.3 . . ? 
H5A_23 C5_23 H5B_23 109.2 . . ? 
O6_23 C6_23 N1_24 123.3(6) . . ? 
O6_23 C6_23 C1A_23 120.6(7) . . ? 
N1_24 C6_23 C1A_23 115.9(5) . . ? 
O3_23 C7_23 H7A_23 109.5 . . ? 
O3_23 C7_23 H7B_23 109.5 . . ? 
H7A_23 C7_23 H7B_23 109.5 . . ? 
O3_23 C7_23 H7C_23 109.5 . . ? 
H7A_23 C7_23 H7C_23 109.5 . . ? 
H7B_23 C7_23 H7C_23 109.5 . . ? 
C6_23 N1_24 C1A_24 121.9(6) . . ? 
C6_23 N1_24 H1_24 119.1 . . ? 
C1A_24 N1_24 H1_24 119.1 . . ? 
N1_24 C1A_24 C6_24 113.4(5) . . ? 
N1_24 C1A_24 C2_24 110.2(6) . . ? 
C6_24 C1A_24 C2_24 109.4(6) . . ? 
N1_24 C1A_24 H1A_24 107.9 . . ? 
C6_24 C1A_24 H1A_24 107.9 . . ? 
C2_24 C1A_24 H1A_24 107.9 . . ? 
C1A_24 C2_24 C3_24 107.4(9) . . ? 
C1A_24 C2_24 H2A_24 110.2 . . ? 
C3_24 C2_24 H2A_24 110.2 . . ? 
C1A_24 C2_24 H2B_24 110.2 . . ? 
C3_24 C2_24 H2B_24 110.2 . . ? 
H2A_24 C2_24 H2B_24 108.5 . . ? 
C5_24 C3_24 C4_24 115.6(13) . . ? 
C5_24 C3_24 C2_24 105.7(11) . . ? 
C4_24 C3_24 C2_24 105.1(11) . . ? 
C5_24 C3_24 H3_24 110.1 . . ? 
C4_24 C3_24 H3_24 110.1 . . ? 
C2_24 C3_24 H3_24 110.1 . . ? 
C3_24 C4_24 H4A_24 109.5 . . ? 
C3_24 C4_24 H4B_24 109.5 . . ? 
H4A_24 C4_24 H4B_24 109.5 . . ? 
C3_24 C4_24 H4C_24 109.5 . . ? 
H4A_24 C4_24 H4C_24 109.5 . . ? 
H4B_24 C4_24 H4C_24 109.5 . . ? 
C3_24 C5_24 H5A_24 109.5 . . ? 
C3_24 C5_24 H5B_24 109.5 . . ? 
H5A_24 C5_24 H5B_24 109.5 . . ? 
C3_24 C5_24 H5C_24 109.5 . . ? 
H5A_24 C5_24 H5C_24 109.5 . . ? 
H5B_24 C5_24 H5C_24 109.5 . . ? 
O6_24 C6_24 N1_25 122.2(6) . . ? 
O6_24 C6_24 C1A_24 120.6(6) . . ? 
N1_25 C6_24 C1A_24 117.2(5) . . ? 
C6_24 N1_25 C1A_25 120.6(5) . . ? 
C6_24 N1_25 H1_25 119.7 . . ? 
C1A_25 N1_25 H1_25 119.7 . . ? 
N1_25 C1A_25 C6_25 110.4(5) . . ? 
N1_25 C1A_25 C2_25 108.7(5) . . ? 
C6_25 C1A_25 C2_25 109.4(5) . . ? 
N1_25 C1A_25 H1A_25 109.5 . . ? 
C6_25 C1A_25 H1A_25 109.5 . . ? 
C2_25 C1A_25 H1A_25 109.5 . . ? 
C3_25 C2_25 C1A_25 113.9(6) . . ? 
C3_25 C2_25 H2A_25 108.8 . . ? 
C1A_25 C2_25 H2A_25 108.8 . . ? 
C3_25 C2_25 H2B_25 108.8 . . ? 
C1A_25 C2_25 H2B_25 108.8 . . ? 
H2A_25 C2_25 H2B_25 107.7 . . ? 
C4_25 C3_25 C2_25 113.3(7) . . ? 
C4_25 C3_25 C5_25 110.5(7) . . ? 
C2_25 C3_25 C5_25 108.0(7) . . ? 
C4_25 C3_25 H3_25 108.3 . . ? 
C2_25 C3_25 H3_25 108.3 . . ? 
C5_25 C3_25 H3_25 108.3 . . ? 
C3_25 C4_25 H4A_25 109.5 . . ? 
C3_25 C4_25 H4B_25 109.5 . . ? 
H4A_25 C4_25 H4B_25 109.5 . . ? 
C3_25 C4_25 H4C_25 109.5 . . ? 
H4A_25 C4_25 H4C_25 109.5 . . ? 
H4B_25 C4_25 H4C_25 109.5 . . ? 
C3_25 C5_25 H5A_25 109.5 . . ? 
C3_25 C5_25 H5B_25 109.5 . . ? 
H5A_25 C5_25 H5B_25 109.5 . . ? 
C3_25 C5_25 H5C_25 109.5 . . ? 
H5A_25 C5_25 H5C_25 109.5 . . ? 
H5B_25 C5_25 H5C_25 109.5 . . ? 
O6_25 C6_25 N1_26 121.0(6) . . ? 
O6_25 C6_25 C1A_25 121.1(6) . . ? 
N1_26 C6_25 C1A_25 117.9(6) . . ? 
C6_25 N1_26 C1A_26 121.7(6) . . ? 
C6_25 N1_26 H1_26 119.1 . . ? 
C1A_26 N1_26 H1_26 119.1 . . ? 
N1_26 C1A_26 C6_26 108.6(7) . . ? 
N1_26 C1A_26 C5_26 109.5(6) . . ? 
C6_26 C1A_26 C5_26 111.3(8) . . ? 
N1_26 C1A_26 C2_26 111.0(7) . . ? 
C6_26 C1A_26 C2_26 113.2(7) . . ? 
C5_26 C1A_26 C2_26 103.1(8) . . ? 
C1A_26 C2_26 C3_26 106.5(7) . . ? 
C1A_26 C2_26 H2A_26 110.4 . . ? 
C3_26 C2_26 H2A_26 110.4 . . ? 
C1A_26 C2_26 H2B_26 110.4 . . ? 
C3_26 C2_26 H2B_26 110.4 . . ? 
H2A_26 C2_26 H2B_26 108.6 . . ? 
O3_26 C3_26 C2_26 106.0(7) . . ? 
O3_26 C3_26 C4_26 111.5(8) . . ? 
C2_26 C3_26 C4_26 104.3(9) . . ? 
O3_26 C3_26 H3_26 111.6 . . ? 
C2_26 C3_26 H3_26 111.6 . . ? 
C4_26 C3_26 H3_26 111.6 . . ? 
C7_26 O3_26 C3_26 113.7(10) . . ? 
C5_26 C4_26 C3_26 107.2(9) . . ? 
C5_26 C4_26 H4A_26 110.3 . . ? 
C3_26 C4_26 H4A_26 110.3 . . ? 
C5_26 C4_26 H4B_26 110.3 . . ? 
C3_26 C4_26 H4B_26 110.3 . . ? 
H4A_26 C4_26 H4B_26 108.5 . . ? 
C4_26 C5_26 C1A_26 104.2(9) . . ? 
C4_26 C5_26 H5A_26 110.9 . . ? 
C1A_26 C5_26 H5A_26 110.9 . . ? 
C4_26 C5_26 H5B_26 110.9 . . ? 
C1A_26 C5_26 H5B_26 110.9 . . ? 
H5A_26 C5_26 H5B_26 108.9 . . ? 
O6_26 C6_26 O8_26 122.5(10) . . ? 
O6_26 C6_26 C1A_26 124.0(10) . . ? 
O8_26 C6_26 C1A_26 113.4(8) . . ? 
O3_26 C7_26 H7A_26 109.5 . . ? 
O3_26 C7_26 H7B_26 109.5 . . ? 
H7A_26 C7_26 H7B_26 109.5 . . ? 
O3_26 C7_26 H7C_26 109.5 . . ? 
H7A_26 C7_26 H7C_26 109.5 . . ? 
H7B_26 C7_26 H7C_26 109.5 . . ? 
C6_26 O8_26 C8_26 115.4(10) . . ? 
O8_26 C8_26 H8A_26 109.5 . . ? 
O8_26 C8_26 H8B_26 109.5 . . ? 
H8A_26 C8_26 H8B_26 109.5 . . ? 
O8_26 C8_26 H8C_26 109.5 . . ? 
H8A_26 C8_26 H8C_26 109.5 . . ? 
H8B_26 C8_26 H8C_26 109.5 . . ? 
C5_30 O1_30 C13_30 120.8(6) . . ? 
O1_30 C13_30 C3_30 109.5(7) . . ? 
O1_30 C13_30 C4_30 110.5(7) . . ? 
C3_30 C13_30 C4_30 112.7(8) . . ? 
O1_30 C13_30 C2_30 102.4(7) . . ? 
C3_30 C13_30 C2_30 110.2(9) . . ? 
C4_30 C13_30 C2_30 110.9(9) . . ? 
C13_30 C2_30 H2A_30 109.5 . . ? 
C13_30 C2_30 H2B_30 109.5 . . ? 
H2A_30 C2_30 H2B_30 109.5 . . ? 
C13_30 C2_30 H2C_30 109.5 . . ? 
H2A_30 C2_30 H2C_30 109.5 . . ? 
H2B_30 C2_30 H2C_30 109.5 . . ? 
C13_30 C3_30 H3A_30 109.5 . . ? 
C13_30 C3_30 H3B_30 109.5 . . ? 
H3A_30 C3_30 H3B_30 109.5 . . ? 
C13_30 C3_30 H3C_30 109.5 . . ? 
H3A_30 C3_30 H3C_30 109.5 . . ? 
H3B_30 C3_30 H3C_30 109.5 . . ? 
C13_30 C4_30 H4A_30 109.5 . . ? 
C13_30 C4_30 H4B_30 109.5 . . ? 
H4A_30 C4_30 H4B_30 109.5 . . ? 
C13_30 C4_30 H4C_30 109.5 . . ? 
H4A_30 C4_30 H4C_30 109.5 . . ? 
H4B_30 C4_30 H4C_30 109.5 . . ? 
O5_30 C5_30 O1_30 126.1(6) . . ? 
O5_30 C5_30 N1_31 122.5(7) . . ? 
O1_30 C5_30 N1_31 111.4(6) . . ? 
C5_30 N1_31 C1A_31 118.7(6) . . ? 
C5_30 N1_31 H1_31 120.6 . . ? 
C1A_31 N1_31 H1_31 120.6 . . ? 
N1_31 C1A_31 C6_31 112.7(6) . . ? 
N1_31 C1A_31 C2_31 111.7(5) . . ? 
C6_31 C1A_31 C2_31 109.7(6) . . ? 
N1_31 C1A_31 H1A_31 107.5 . . ? 
C6_31 C1A_31 H1A_31 107.5 . . ? 
C2_31 C1A_31 H1A_31 107.5 . . ? 
C3_31 C2_31 C1A_31 114.9(6) . . ? 
C3_31 C2_31 H2A_31 108.5 . . ? 
C1A_31 C2_31 H2A_31 108.5 . . ? 
C3_31 C2_31 H2B_31 108.5 . . ? 
C1A_31 C2_31 H2B_31 108.5 . . ? 
H2A_31 C2_31 H2B_31 107.5 . . ? 
C5_31 C3_31 C2_31 114.2(7) . . ? 
C5_31 C3_31 C4_31 109.9(8) . . ? 
C2_31 C3_31 C4_31 111.3(7) . . ? 
C5_31 C3_31 H3_31 107.0 . . ? 
C2_31 C3_31 H3_31 107.0 . . ? 
C4_31 C3_31 H3_31 107.0 . . ? 
C3_31 C4_31 H4A_31 109.5 . . ? 
C3_31 C4_31 H4B_31 109.5 . . ? 
H4A_31 C4_31 H4B_31 109.5 . . ? 
C3_31 C4_31 H4C_31 109.5 . . ? 
H4A_31 C4_31 H4C_31 109.5 . . ? 
H4B_31 C4_31 H4C_31 109.5 . . ? 
C3_31 C5_31 H5A_31 109.5 . . ? 
C3_31 C5_31 H5B_31 109.5 . . ? 
H5A_31 C5_31 H5B_31 109.5 . . ? 
C3_31 C5_31 H5C_31 109.5 . . ? 
H5A_31 C5_31 H5C_31 109.5 . . ? 
H5B_31 C5_31 H5C_31 109.5 . . ? 
O6_31 C6_31 N1_32 121.7(6) . . ? 
O6_31 C6_31 C1A_31 117.8(6) . . ? 
N1_32 C6_31 C1A_31 120.5(6) . . ? 
C6_31 N1_32 C1A_32 119.5(6) . . ? 
C6_31 N1_32 H1_32 120.3 . . ? 
C1A_32 N1_32 H1_32 120.3 . . ? 
C6_32 C1A_32 N1_32 110.4(6) . . ? 
C6_32 C1A_32 C2_32 109.5(7) . . ? 
N1_32 C1A_32 C2_32 111.5(6) . . ? 
C6_32 C1A_32 H1A_32 108.5 . . ? 
N1_32 C1A_32 H1A_32 108.5 . . ? 
C2_32 C1A_32 H1A_32 108.5 . . ? 
C3_32 C2_32 C1A_32 116.6(9) . . ? 
C3_32 C2_32 H2A_32 108.1 . . ? 
C1A_32 C2_32 H2A_32 108.1 . . ? 
C3_32 C2_32 H2B_32 108.1 . . ? 
C1A_32 C2_32 H2B_32 108.1 . . ? 
H2A_32 C2_32 H2B_32 107.3 . . ? 
C2_32 C3_32 C5_32 108.7(14) . . ? 
C2_32 C3_32 C4_32 110.1(10) . . ? 
C5_32 C3_32 C4_32 115.4(15) . . ? 
C2_32 C3_32 H3_32 107.4 . . ? 
C5_32 C3_32 H3_32 107.4 . . ? 
C4_32 C3_32 H3_32 107.4 . . ? 
C3_32 C4_32 H4A_32 109.5 . . ? 
C3_32 C4_32 H4B_32 109.5 . . ? 
H4A_32 C4_32 H4B_32 109.5 . . ? 
C3_32 C4_32 H4C_32 109.5 . . ? 
H4A_32 C4_32 H4C_32 109.5 . . ? 
H4B_32 C4_32 H4C_32 109.5 . . ? 
C3_32 C5_32 H5A_32 109.5 . . ? 
C3_32 C5_32 H5B_32 109.5 . . ? 
H5A_32 C5_32 H5B_32 109.5 . . ? 
C3_32 C5_32 H5C_32 109.5 . . ? 
H5A_32 C5_32 H5C_32 109.5 . . ? 
H5B_32 C5_32 H5C_32 109.5 . . ? 
O6_32 C6_32 N1_33 122.9(7) . . ? 
O6_32 C6_32 C1A_32 117.3(8) . . ? 
N1_33 C6_32 C1A_32 119.8(6) . . ? 
C6_32 N1_33 C1A_33 121.3(7) . . ? 
C6_32 N1_33 H1_33 119.3 . . ? 
C1A_33 N1_33 H1_33 119.3 . . ? 
N1_33 C1A_33 C5_33 111.7(7) . . ? 
N1_33 C1A_33 C6_33 111.1(6) . . ? 
C5_33 C1A_33 C6_33 114.1(7) . . ? 
N1_33 C1A_33 C2_33 108.6(6) . . ? 
C5_33 C1A_33 C2_33 103.9(7) . . ? 
C6_33 C1A_33 C2_33 106.9(7) . . ? 
C3_33 C2_33 C1A_33 105.5(7) . . ? 
C3_33 C2_33 H2A_33 110.6 . . ? 
C1A_33 C2_33 H2A_33 110.6 . . ? 
C3_33 C2_33 H2B_33 110.6 . . ? 
C1A_33 C2_33 H2B_33 110.6 . . ? 
H2A_33 C2_33 H2B_33 108.8 . . ? 
O3_33 C3_33 C4_33 113.5(7) . . ? 
O3_33 C3_33 C2_33 106.0(7) . . ? 
C4_33 C3_33 C2_33 105.2(8) . . ? 
O3_33 C3_33 H3_33 110.6 . . ? 
C4_33 C3_33 H3_33 110.6 . . ? 
C2_33 C3_33 H3_33 110.6 . . ? 
C3_33 O3_33 C7_33 114.3(8) . . ? 
C3_33 C4_33 C5_33 107.1(7) . . ? 
C3_33 C4_33 H4A_33 110.3 . . ? 
C5_33 C4_33 H4A_33 110.3 . . ? 
C3_33 C4_33 H4B_33 110.3 . . ? 
C5_33 C4_33 H4B_33 110.3 . . ? 
H4A_33 C4_33 H4B_33 108.5 . . ? 
C1A_33 C5_33 C4_33 101.5(8) . . ? 
C1A_33 C5_33 H5A_33 111.5 . . ? 
C4_33 C5_33 H5A_33 111.5 . . ? 
C1A_33 C5_33 H5B_33 111.5 . . ? 
C4_33 C5_33 H5B_33 111.5 . . ? 
H5A_33 C5_33 H5B_33 109.3 . . ? 
O6_33 C6_33 N1_34 122.8(7) . . ? 
O6_33 C6_33 C1A_33 121.9(7) . . ? 
N1_34 C6_33 C1A_33 115.2(6) . . ? 
O3_33 C7_33 H7A_33 109.5 . . ? 
O3_33 C7_33 H7B_33 109.5 . . ? 
H7A_33 C7_33 H7B_33 109.5 . . ? 
O3_33 C7_33 H7C_33 109.5 . . ? 
H7A_33 C7_33 H7C_33 109.5 . . ? 
H7B_33 C7_33 H7C_33 109.5 . . ? 
C6_33 N1_34 C1A_34 121.6(6) . . ? 
C6_33 N1_34 H1_34 119.2 . . ? 
C1A_34 N1_34 H1_34 119.2 . . ? 
N1_34 C1A_34 C6_34 111.9(5) . . ? 
N1_34 C1A_34 C2_34 112.4(5) . . ? 
C6_34 C1A_34 C2_34 108.4(5) . . ? 
N1_34 C1A_34 H1A_34 108.0 . . ? 
C6_34 C1A_34 H1A_34 108.0 . . ? 
C2_34 C1A_34 H1A_34 108.0 . . ? 
C3_34 C2_34 C1A_34 115.6(6) . . ? 
C3_34 C2_34 H2A_34 108.4 . . ? 
C1A_34 C2_34 H2A_34 108.4 . . ? 
C3_34 C2_34 H2B_34 108.4 . . ? 
C1A_34 C2_34 H2B_34 108.4 . . ? 
H2A_34 C2_34 H2B_34 107.4 . . ? 
C2_34 C3_34 C5_34 113.4(6) . . ? 
C2_34 C3_34 C4_34 110.3(6) . . ? 
C5_34 C3_34 C4_34 111.0(7) . . ? 
C2_34 C3_34 H3_34 107.3 . . ? 
C5_34 C3_34 H3_34 107.3 . . ? 
C4_34 C3_34 H3_34 107.3 . . ? 
C3_34 C4_34 H4A_34 109.5 . . ? 
C3_34 C4_34 H4B_34 109.5 . . ? 
H4A_34 C4_34 H4B_34 109.5 . . ? 
C3_34 C4_34 H4C_34 109.5 . . ? 
H4A_34 C4_34 H4C_34 109.5 . . ? 
H4B_34 C4_34 H4C_34 109.5 . . ? 
C3_34 C5_34 H5A_34 109.5 . . ? 
C3_34 C5_34 H5B_34 109.5 . . ? 
H5A_34 C5_34 H5B_34 109.5 . . ? 
C3_34 C5_34 H5C_34 109.5 . . ? 
H5A_34 C5_34 H5C_34 109.5 . . ? 
H5B_34 C5_34 H5C_34 109.5 . . ? 
O6_34 C6_34 N1_35 122.0(6) . . ? 
O6_34 C6_34 C1A_34 121.2(6) . . ? 
N1_35 C6_34 C1A_34 116.6(5) . . ? 
C6_34 N1_35 C1A_35 120.6(6) . . ? 
C6_34 N1_35 H1_35 119.7 . . ? 
C1A_35 N1_35 H1_35 119.7 . . ? 
N1_35 C1A_35 C2_35 108.4(7) . . ? 
N1_35 C1A_35 C6_35 112.6(6) . . ? 
C2_35 C1A_35 C6_35 110.3(7) . . ? 
N1_35 C1A_35 H1A_35 108.4 . . ? 
C2_35 C1A_35 H1A_35 108.4 . . ? 
C6_35 C1A_35 H1A_35 108.4 . . ? 
C3_35 C2_35 C1A_35 118.7(9) . . ? 
C3_35 C2_35 H2A_35 107.6 . . ? 
C1A_35 C2_35 H2A_35 107.6 . . ? 
C3_35 C2_35 H2B_35 107.6 . . ? 
C1A_35 C2_35 H2B_35 107.6 . . ? 
H2A_35 C2_35 H2B_35 107.1 . . ? 
C2_35 C3_35 C5_35 112.8(10) . . ? 
C2_35 C3_35 C4_35 111.6(11) . . ? 
C5_35 C3_35 C4_35 111.8(11) . . ? 
C2_35 C3_35 H3_35 106.7 . . ? 
C5_35 C3_35 H3_35 106.7 . . ? 
C4_35 C3_35 H3_35 106.7 . . ? 
C3_35 C4_35 H4A_35 109.5 . . ? 
C3_35 C4_35 H4B_35 109.5 . . ? 
H4A_35 C4_35 H4B_35 109.5 . . ? 
C3_35 C4_35 H4C_35 109.5 . . ? 
H4A_35 C4_35 H4C_35 109.5 . . ? 
H4B_35 C4_35 H4C_35 109.5 . . ? 
C3_35 C5_35 H5A_35 109.5 . . ? 
C3_35 C5_35 H5B_35 109.5 . . ? 
H5A_35 C5_35 H5B_35 109.5 . . ? 
C3_35 C5_35 H5C_35 109.5 . . ? 
H5A_35 C5_35 H5C_35 109.5 . . ? 
H5B_35 C5_35 H5C_35 109.5 . . ? 
O6_35 C6_35 N1_36 124.1(7) . . ? 
O6_35 C6_35 C1A_35 120.7(7) . . ? 
N1_36 C6_35 C1A_35 115.1(7) . . ? 
C6_35 N1_36 C1A_36 121.5(8) . . ? 
C6_35 N1_36 H1_36 119.3 . . ? 
C1A_36 N1_36 H1_36 119.3 . . ? 
N1_36 C1A_36 C6_36 113.8(8) . . ? 
N1_36 C1A_36 C2_36 106.1(8) . . ? 
C6_36 C1A_36 C2_36 109.4(9) . . ? 
N1_36 C1A_36 C5_36 111.7(9) . . ? 
C6_36 C1A_36 C5_36 110.0(9) . . ? 
C2_36 C1A_36 C5_36 105.5(8) . . ? 
C1A_36 C2_36 C3_36 98.2(10) . . ? 
C1A_36 C2_36 H2A_36 112.1 . . ? 
C3_36 C2_36 H2A_36 112.1 . . ? 
C1A_36 C2_36 H2B_36 112.1 . . ? 
C3_36 C2_36 H2B_36 112.1 . . ? 
H2A_36 C2_36 H2B_36 109.8 . . ? 
O3_36 C3_36 C2_36 106.9(11) . . ? 
O3_36 C3_36 C4_36 115.7(12) . . ? 
C2_36 C3_36 C4_36 108.8(10) . . ? 
O3_36 C3_36 H3_36 108.4 . . ? 
C2_36 C3_36 H3_36 108.4 . . ? 
C4_36 C3_36 H3_36 108.4 . . ? 
C3_36 O3_36 C7_36 110.8(12) . . ? 
C5_36 C4_36 C3_36 96.9(11) . . ? 
C5_36 C4_36 H4A_36 112.4 . . ? 
C3_36 C4_36 H4A_36 112.4 . . ? 
C5_36 C4_36 H4B_36 112.4 . . ? 
C3_36 C4_36 H4B_36 112.4 . . ? 
H4A_36 C4_36 H4B_36 109.9 . . ? 
C4_36 C5_36 C1A_36 103.8(10) . . ? 
C4_36 C5_36 H5A_36 111.0 . . ? 
C1A_36 C5_36 H5A_36 111.0 . . ? 
C4_36 C5_36 H5B_36 111.0 . . ? 
C1A_36 C5_36 H5B_36 111.0 . . ? 
H5A_36 C5_36 H5B_36 109.0 . . ? 
O6_36 C6_36 O8_36 121.8(11) . . ? 
O6_36 C6_36 C1A_36 125.2(11) . . ? 
O8_36 C6_36 C1A_36 113.0(9) . . ? 
O3_36 C7_36 H7A_36 109.5 . . ? 
O3_36 C7_36 H7B_36 109.5 . . ? 
H7A_36 C7_36 H7B_36 109.5 . . ? 
O3_36 C7_36 H7C_36 109.5 . . ? 
H7A_36 C7_36 H7C_36 109.5 . . ? 
H7B_36 C7_36 H7C_36 109.5 . . ? 
C6_36 O8_36 C8_36 117.5(11) . . ? 
O8_36 C8_36 H8A_36 109.5 . . ? 
O8_36 C8_36 H8B_36 109.5 . . ? 
H8A_36 C8_36 H8B_36 109.5 . . ? 
O8_36 C8_36 H8C_36 109.5 . . ? 
H8A_36 C8_36 H8C_36 109.5 . . ? 
H8B_36 C8_36 H8C_36 109.5 . . ? 
 
loop_ 
 _geom_torsion_atom_site_label_1 
 _geom_torsion_atom_site_label_2 
 _geom_torsion_atom_site_label_3 
 _geom_torsion_atom_site_label_4 
 _geom_torsion 
 _geom_torsion_site_symmetry_1 
 _geom_torsion_site_symmetry_2 
 _geom_torsion_site_symmetry_3 
 _geom_torsion_site_symmetry_4 
 _geom_torsion_publ_flag 
C5_10 O1_10 C11_10 C3_10 54.6(8) . . . . ? 
C5_10 O1_10 C11_10 C2_10 170.8(7) . . . . ? 
C5_10 O1_10 C11_10 C4_10 -70.1(8) . . . . ? 
C11_10 O1_10 C5_10 O5_10 8.9(10) . . . . ? 
C11_10 O1_10 C5_10 N1_11 -169.8(6) . . . . ? 
O5_10 C5_10 N1_11 C1A_11 2.8(10) . . . . ? 
O1_10 C5_10 N1_11 C1A_11 -178.4(5) . . . . ? 
C5_10 N1_11 C1A_11 C6_11 -68.6(7) . . . . ? 
C5_10 N1_11 C1A_11 C2_11 169.5(6) . . . . ? 
N1_11 C1A_11 C2_11 C3_11 -61.0(7) . . . . ? 
C6_11 C1A_11 C2_11 C3_11 174.1(5) . . . . ? 
C1A_11 C2_11 C3_11 C4_11 -59.5(8) . . . . ? 
C1A_11 C2_11 C3_11 C5_11 177.3(6) . . . . ? 
N1_11 C1A_11 C6_11 O6_11 162.3(5) . . . . ? 
C2_11 C1A_11 C6_11 O6_11 -74.7(7) . . . . ? 
N1_11 C1A_11 C6_11 N1_12 -14.4(8) . . . . ? 
C2_11 C1A_11 C6_11 N1_12 108.5(6) . . . . ? 
O6_11 C6_11 N1_12 C1A_12 -4.4(9) . . . . ? 
C1A_11 C6_11 N1_12 C1A_12 172.4(6) . . . . ? 
C6_11 N1_12 C1A_12 C6_12 -62.3(8) . . . . ? 
C6_11 N1_12 C1A_12 C2_12 175.7(7) . . . . ? 
N1_12 C1A_12 C2_12 C3_12 -80.6(11) . . . . ? 
C6_12 C1A_12 C2_12 C3_12 153.8(9) . . . . ? 
C1A_12 C2_12 C3_12 C5_12 -41.9(16) . . . . ? 
C1A_12 C2_12 C3_12 C4_12 -165.3(10) . . . . ? 
N1_12 C1A_12 C6_12 O6_12 154.8(7) . . . . ? 
C2_12 C1A_12 C6_12 O6_12 -79.5(9) . . . . ? 
N1_12 C1A_12 C6_12 N1_13 -24.5(10) . . . . ? 
C2_12 C1A_12 C6_12 N1_13 101.2(9) . . . . ? 
O6_12 C6_12 N1_13 C1A_13 -3.4(11) . . . . ? 
C1A_12 C6_12 N1_13 C1A_13 175.9(7) . . . . ? 
C6_12 N1_13 C1A_13 C2_13 179.7(7) . . . . ? 
C6_12 N1_13 C1A_13 C6_13 -56.1(11) . . . . ? 
C6_12 N1_13 C1A_13 C5_13 68.8(10) . . . . ? 
N1_13 C1A_13 C2_13 C3_13 -97.8(9) . . . . ? 
C6_13 C1A_13 C2_13 C3_13 138.1(8) . . . . ? 
C5_13 C1A_13 C2_13 C3_13 20.5(10) . . . . ? 
C1A_13 C2_13 C3_13 O3_13 -109.8(13) . . . . ? 
C1A_13 C2_13 C3_13 C4_13 9.1(12) . . . . ? 
C4_13 C3_13 O3_13 C7_13 151(2) . . . . ? 
C2_13 C3_13 O3_13 C7_13 -87(2) . . . . ? 
O3_13 C3_13 C4_13 C5_13 88.3(13) . . . . ? 
C2_13 C3_13 C4_13 C5_13 -34.0(13) . . . . ? 
C3_13 C4_13 C5_13 C1A_13 47.7(14) . . . . ? 
N1_13 C1A_13 C5_13 C4_13 71.3(13) . . . . ? 
C2_13 C1A_13 C5_13 C4_13 -45.3(13) . . . . ? 
C6_13 C1A_13 C5_13 C4_13 -163.4(11) . . . . ? 
N1_13 C1A_13 C6_13 O6_13 148.8(10) . . . . ? 
C2_13 C1A_13 C6_13 O6_13 -88.0(13) . . . . ? 
C5_13 C1A_13 C6_13 O6_13 23.2(15) . . . . ? 
N1_13 C1A_13 C6_13 N1_14 -38.2(11) . . . . ? 
C2_13 C1A_13 C6_13 N1_14 85.0(9) . . . . ? 
C5_13 C1A_13 C6_13 N1_14 -163.9(9) . . . . ? 
O6_13 C6_13 N1_14 C1A_14 -8.5(14) . . . . ? 
C1A_13 C6_13 N1_14 C1A_14 178.5(7) . . . . ? 
C6_13 N1_14 C1A_14 C6_14 -77.3(9) . . . . ? 
C6_13 N1_14 C1A_14 C2_14 162.4(7) . . . . ? 
N1_14 C1A_14 C2_14 C3_14 -70.1(9) . . . . ? 
C6_14 C1A_14 C2_14 C3_14 165.7(7) . . . . ? 
C1A_14 C2_14 C3_14 C4_14 165.8(8) . . . . ? 
C1A_14 C2_14 C3_14 C5_14 -70.2(13) . . . . ? 
N1_14 C1A_14 C6_14 O6_14 140.4(7) . . . . ? 
C2_14 C1A_14 C6_14 O6_14 -98.2(8) . . . . ? 
N1_14 C1A_14 C6_14 N1_15 -39.6(9) . . . . ? 
C2_14 C1A_14 C6_14 N1_15 81.8(7) . . . . ? 
O6_14 C6_14 N1_15 C1A_15 -2.4(9) . . . . ? 
C1A_14 C6_14 N1_15 C1A_15 177.6(6) . . . . ? 
C6_14 N1_15 C1A_15 C6_15 -62.9(7) . . . . ? 
C6_14 N1_15 C1A_15 C2_15 173.9(6) . . . . ? 
N1_15 C1A_15 C2_15 C3_15 -173.4(5) . . . . ? 
C6_15 C1A_15 C2_15 C3_15 62.4(7) . . . . ? 
C1A_15 C2_15 C3_15 C5_15 65.9(7) . . . . ? 
C1A_15 C2_15 C3_15 C4_15 -171.0(6) . . . . ? 
N1_15 C1A_15 C6_15 O6_15 142.6(6) . . . . ? 
C2_15 C1A_15 C6_15 O6_15 -94.4(7) . . . . ? 
N1_15 C1A_15 C6_15 N1_16 -40.8(7) . . . . ? 
C2_15 C1A_15 C6_15 N1_16 82.1(7) . . . . ? 
O6_15 C6_15 N1_16 C1A_16 0.8(9) . . . . ? 
C1A_15 C6_15 N1_16 C1A_16 -175.7(6) . . . . ? 
C6_15 N1_16 C1A_16 C6_16 56.6(8) . . . . ? 
C6_15 N1_16 C1A_16 C5_16 174.5(7) . . . . ? 
C6_15 N1_16 C1A_16 C2_16 -68.6(8) . . . . ? 
N1_16 C1A_16 C2_16 C3_16 -113.0(9) . . . . ? 
C6_16 C1A_16 C2_16 C3_16 122.8(9) . . . . ? 
C5_16 C1A_16 C2_16 C3_16 4.8(11) . . . . ? 
C1A_16 C2_16 C3_16 O3_16 -118.2(15) . . . . ? 
C1A_16 C2_16 C3_16 C4_16 19.0(17) . . . . ? 
C4_16 C3_16 O3_16 C7_16 79(3) . . . . ? 
C2_16 C3_16 O3_16 C7_16 -154(2) . . . . ? 
O3_16 C3_16 C4_16 C5_16 92(2) . . . . ? 
C2_16 C3_16 C4_16 C5_16 -36(2) . . . . ? 
C3_16 C4_16 C5_16 C1A_16 38(2) . . . . ? 
N1_16 C1A_16 C5_16 C4_16 92.0(13) . . . . ? 
C6_16 C1A_16 C5_16 C4_16 -147.8(13) . . . . ? 
C2_16 C1A_16 C5_16 C4_16 -26.4(14) . . . . ? 
N1_16 C1A_16 C6_16 O6_16 -147.3(7) . . . . ? 
C5_16 C1A_16 C6_16 O6_16 94.1(9) . . . . ? 
C2_16 C1A_16 C6_16 O6_16 -23.9(10) . . . . ? 
N1_16 C1A_16 C6_16 O8_16 37.9(8) . . . . ? 
C5_16 C1A_16 C6_16 O8_16 -80.6(8) . . . . ? 
C2_16 C1A_16 C6_16 O8_16 161.4(6) . . . . ? 
O6_16 C6_16 O8_16 C8_16 0.0(11) . . . . ? 
C1A_16 C6_16 O8_16 C8_16 174.9(7) . . . . ? 
C5_20 O1_20 C12_20 C4_20 -62.0(10) . . . . ? 
C5_20 O1_20 C12_20 C3_20 62.8(9) . . . . ? 
C5_20 O1_20 C12_20 C2_20 174.5(8) . . . . ? 
C12_20 O1_20 C5_20 O5_20 4.1(10) . . . . ? 
C12_20 O1_20 C5_20 N1_21 -175.2(6) . . . . ? 
O5_20 C5_20 N1_21 C1A_21 4.6(9) . . . . ? 
O1_20 C5_20 N1_21 C1A_21 -176.0(5) . . . . ? 
C5_20 N1_21 C1A_21 C6_21 -68.3(7) . . . . ? 
C5_20 N1_21 C1A_21 C2_21 166.1(6) . . . . ? 
N1_21 C1A_21 C2_21 C3_21 -62.4(9) . . . . ? 
C6_21 C1A_21 C2_21 C3_21 170.3(7) . . . . ? 
C1A_21 C2_21 C3_21 C4_21 -56.3(13) . . . . ? 
C1A_21 C2_21 C3_21 C5_21 -174.9(9) . . . . ? 
N1_21 C1A_21 C6_21 O6_21 162.8(5) . . . . ? 
C2_21 C1A_21 C6_21 O6_21 -71.2(7) . . . . ? 
N1_21 C1A_21 C6_21 N1_22 -15.1(8) . . . . ? 
C2_21 C1A_21 C6_21 N1_22 110.9(6) . . . . ? 
O6_21 C6_21 N1_22 C1A_22 -6.1(9) . . . . ? 
C1A_21 C6_21 N1_22 C1A_22 171.8(5) . . . . ? 
C6_21 N1_22 C1A_22 C6_22 -55.2(7) . . . . ? 
C6_21 N1_22 C1A_22 C2_22 178.9(5) . . . . ? 
N1_22 C1A_22 C2_22 C3_22 -176.7(5) . . . . ? 
C6_22 C1A_22 C2_22 C3_22 57.8(7) . . . . ? 
C1A_22 C2_22 C3_22 C5_22 -178.0(6) . . . . ? 
C1A_22 C2_22 C3_22 C4_22 59.6(8) . . . . ? 
N1_22 C1A_22 C6_22 O6_22 149.5(6) . . . . ? 
C2_22 C1A_22 C6_22 O6_22 -86.3(7) . . . . ? 
N1_22 C1A_22 C6_22 N1_23 -32.0(7) . . . . ? 
C2_22 C1A_22 C6_22 N1_23 92.2(7) . . . . ? 
O6_22 C6_22 N1_23 C1A_23 0.1(9) . . . . ? 
C1A_22 C6_22 N1_23 C1A_23 -178.4(5) . . . . ? 
C6_22 N1_23 C1A_23 C5_23 65.8(7) . . . . ? 
C6_22 N1_23 C1A_23 C6_23 -61.6(7) . . . . ? 
C6_22 N1_23 C1A_23 C2_23 177.3(5) . . . . ? 
N1_23 C1A_23 C2_23 C3_23 -85.7(6) . . . . ? 
C5_23 C1A_23 C2_23 C3_23 31.9(6) . . . . ? 
C6_23 C1A_23 C2_23 C3_23 152.6(5) . . . . ? 
C1A_23 C2_23 C3_23 O3_23 -127.0(6) . . . . ? 
C1A_23 C2_23 C3_23 C4_23 -8.0(7) . . . . ? 
C4_23 C3_23 O3_23 C7_23 91.0(10) . . . . ? 
C2_23 C3_23 O3_23 C7_23 -153.1(9) . . . . ? 
O3_23 C3_23 C4_23 C5_23 98.7(7) . . . . ? 
C2_23 C3_23 C4_23 C5_23 -18.6(7) . . . . ? 
N1_23 C1A_23 C5_23 C4_23 73.2(6) . . . . ? 
C6_23 C1A_23 C5_23 C4_23 -160.8(6) . . . . ? 
C2_23 C1A_23 C5_23 C4_23 -42.7(6) . . . . ? 
C3_23 C4_23 C5_23 C1A_23 38.9(7) . . . . ? 
N1_23 C1A_23 C6_23 O6_23 155.0(6) . . . . ? 
C5_23 C1A_23 C6_23 O6_23 28.8(9) . . . . ? 
C2_23 C1A_23 C6_23 O6_23 -84.5(8) . . . . ? 
N1_23 C1A_23 C6_23 N1_24 -30.5(8) . . . . ? 
C5_23 C1A_23 C6_23 N1_24 -156.7(6) . . . . ? 
C2_23 C1A_23 C6_23 N1_24 90.0(7) . . . . ? 
O6_23 C6_23 N1_24 C1A_24 -10.6(11) . . . . ? 
C1A_23 C6_23 N1_24 C1A_24 175.1(6) . . . . ? 
C6_23 N1_24 C1A_24 C6_24 -86.6(8) . . . . ? 
C6_23 N1_24 C1A_24 C2_24 150.4(7) . . . . ? 
N1_24 C1A_24 C2_24 C3_24 -71.1(9) . . . . ? 
C6_24 C1A_24 C2_24 C3_24 163.6(7) . . . . ? 
C1A_24 C2_24 C3_24 C5_24 -140.9(10) . . . . ? 
C1A_24 C2_24 C3_24 C4_24 96.4(12) . . . . ? 
N1_24 C1A_24 C6_24 O6_24 145.5(7) . . . . ? 
C2_24 C1A_24 C6_24 O6_24 -91.0(9) . . . . ? 
N1_24 C1A_24 C6_24 N1_25 -35.5(9) . . . . ? 
C2_24 C1A_24 C6_24 N1_25 88.0(8) . . . . ? 
O6_24 C6_24 N1_25 C1A_25 0.1(10) . . . . ? 
C1A_24 C6_24 N1_25 C1A_25 -178.8(6) . . . . ? 
C6_24 N1_25 C1A_25 C6_25 -62.2(7) . . . . ? 
C6_24 N1_25 C1A_25 C2_25 177.8(6) . . . . ? 
N1_25 C1A_25 C2_25 C3_25 -176.8(6) . . . . ? 
C6_25 C1A_25 C2_25 C3_25 62.6(7) . . . . ? 
C1A_25 C2_25 C3_25 C4_25 65.1(9) . . . . ? 
C1A_25 C2_25 C3_25 C5_25 -172.0(6) . . . . ? 
N1_25 C1A_25 C6_25 O6_25 140.5(6) . . . . ? 
C2_25 C1A_25 C6_25 O6_25 -99.9(7) . . . . ? 
N1_25 C1A_25 C6_25 N1_26 -39.4(8) . . . . ? 
C2_25 C1A_25 C6_25 N1_26 80.1(7) . . . . ? 
O6_25 C6_25 N1_26 C1A_26 -0.3(11) . . . . ? 
C1A_25 C6_25 N1_26 C1A_26 179.7(7) . . . . ? 
C6_25 N1_26 C1A_26 C6_26 52.4(10) . . . . ? 
C6_25 N1_26 C1A_26 C5_26 174.1(8) . . . . ? 
C6_25 N1_26 C1A_26 C2_26 -72.7(10) . . . . ? 
N1_26 C1A_26 C2_26 C3_26 -84.5(8) . . . . ? 
C6_26 C1A_26 C2_26 C3_26 153.1(7) . . . . ? 
C5_26 C1A_26 C2_26 C3_26 32.7(9) . . . . ? 
C1A_26 C2_26 C3_26 O3_26 -131.9(8) . . . . ? 
C1A_26 C2_26 C3_26 C4_26 -14.1(10) . . . . ? 
C2_26 C3_26 O3_26 C7_26 -163.1(9) . . . . ? 
C4_26 C3_26 O3_26 C7_26 84.0(12) . . . . ? 
O3_26 C3_26 C4_26 C5_26 104.0(10) . . . . ? 
C2_26 C3_26 C4_26 C5_26 -9.9(10) . . . . ? 
C3_26 C4_26 C5_26 C1A_26 30.4(10) . . . . ? 
N1_26 C1A_26 C5_26 C4_26 79.7(10) . . . . ? 
C6_26 C1A_26 C5_26 C4_26 -160.2(8) . . . . ? 
C2_26 C1A_26 C5_26 C4_26 -38.6(9) . . . . ? 
N1_26 C1A_26 C6_26 O6_26 -143.0(8) . . . . ? 
C5_26 C1A_26 C6_26 O6_26 96.3(11) . . . . ? 
C2_26 C1A_26 C6_26 O6_26 -19.3(12) . . . . ? 
N1_26 C1A_26 C6_26 O8_26 39.4(9) . . . . ? 
C5_26 C1A_26 C6_26 O8_26 -81.2(9) . . . . ? 
C2_26 C1A_26 C6_26 O8_26 163.2(7) . . . . ? 
O6_26 C6_26 O8_26 C8_26 5.1(13) . . . . ? 
C1A_26 C6_26 O8_26 C8_26 -177.3(9) . . . . ? 
C5_30 O1_30 C13_30 C3_30 64.9(10) . . . . ? 
C5_30 O1_30 C13_30 C4_30 -59.9(10) . . . . ? 
C5_30 O1_30 C13_30 C2_30 -178.2(8) . . . . ? 
C13_30 O1_30 C5_30 O5_30 5.9(12) . . . . ? 
C13_30 O1_30 C5_30 N1_31 -174.7(7) . . . . ? 
O5_30 C5_30 N1_31 C1A_31 7.7(11) . . . . ? 
O1_30 C5_30 N1_31 C1A_31 -171.7(6) . . . . ? 
C5_30 N1_31 C1A_31 C6_31 -67.8(8) . . . . ? 
C5_30 N1_31 C1A_31 C2_31 168.2(6) . . . . ? 
N1_31 C1A_31 C2_31 C3_31 -85.9(8) . . . . ? 
C6_31 C1A_31 C2_31 C3_31 148.5(6) . . . . ? 
C1A_31 C2_31 C3_31 C5_31 61.3(9) . . . . ? 
C1A_31 C2_31 C3_31 C4_31 -63.9(9) . . . . ? 
N1_31 C1A_31 C6_31 O6_31 160.6(6) . . . . ? 
C2_31 C1A_31 C6_31 O6_31 -74.3(8) . . . . ? 
N1_31 C1A_31 C6_31 N1_32 -16.3(9) . . . . ? 
C2_31 C1A_31 C6_31 N1_32 108.8(7) . . . . ? 
O6_31 C6_31 N1_32 C1A_32 -3.6(10) . . . . ? 
C1A_31 C6_31 N1_32 C1A_32 173.2(6) . . . . ? 
C6_31 N1_32 C1A_32 C6_32 -58.0(9) . . . . ? 
C6_31 N1_32 C1A_32 C2_32 -179.9(7) . . . . ? 
C6_32 C1A_32 C2_32 C3_32 126.3(10) . . . . ? 
N1_32 C1A_32 C2_32 C3_32 -111.2(10) . . . . ? 
C1A_32 C2_32 C3_32 C5_32 -71.9(14) . . . . ? 
C1A_32 C2_32 C3_32 C4_32 55.4(13) . . . . ? 
N1_32 C1A_32 C6_32 O6_32 149.8(7) . . . . ? 
C2_32 C1A_32 C6_32 O6_32 -87.1(9) . . . . ? 
N1_32 C1A_32 C6_32 N1_33 -29.7(9) . . . . ? 
C2_32 C1A_32 C6_32 N1_33 93.4(9) . . . . ? 
O6_32 C6_32 N1_33 C1A_33 1.8(11) . . . . ? 
C1A_32 C6_32 N1_33 C1A_33 -178.6(6) . . . . ? 
C6_32 N1_33 C1A_33 C5_33 67.8(10) . . . . ? 
C6_32 N1_33 C1A_33 C6_33 -60.9(9) . . . . ? 
C6_32 N1_33 C1A_33 C2_33 -178.2(6) . . . . ? 
N1_33 C1A_33 C2_33 C3_33 -86.3(7) . . . . ? 
C5_33 C1A_33 C2_33 C3_33 32.7(8) . . . . ? 
C6_33 C1A_33 C2_33 C3_33 153.7(6) . . . . ? 
C1A_33 C2_33 C3_33 O3_33 -131.1(7) . . . . ? 
C1A_33 C2_33 C3_33 C4_33 -10.6(8) . . . . ? 
C4_33 C3_33 O3_33 C7_33 85.2(11) . . . . ? 
C2_33 C3_33 O3_33 C7_33 -159.8(9) . . . . ? 
O3_33 C3_33 C4_33 C5_33 100.6(9) . . . . ? 
C2_33 C3_33 C4_33 C5_33 -14.9(9) . . . . ? 
N1_33 C1A_33 C5_33 C4_33 76.0(9) . . . . ? 
C6_33 C1A_33 C5_33 C4_33 -156.8(8) . . . . ? 
C2_33 C1A_33 C5_33 C4_33 -40.8(8) . . . . ? 
C3_33 C4_33 C5_33 C1A_33 34.9(9) . . . . ? 
N1_33 C1A_33 C6_33 O6_33 149.1(9) . . . . ? 
C5_33 C1A_33 C6_33 O6_33 21.7(14) . . . . ? 
C2_33 C1A_33 C6_33 O6_33 -92.6(11) . . . . ? 
N1_33 C1A_33 C6_33 N1_34 -33.1(10) . . . . ? 
C5_33 C1A_33 C6_33 N1_34 -160.6(8) . . . . ? 
C2_33 C1A_33 C6_33 N1_34 85.2(8) . . . . ? 
O6_33 C6_33 N1_34 C1A_34 -3.0(14) . . . . ? 
C1A_33 C6_33 N1_34 C1A_34 179.2(7) . . . . ? 
C6_33 N1_34 C1A_34 C6_34 -86.3(8) . . . . ? 
C6_33 N1_34 C1A_34 C2_34 151.4(7) . . . . ? 
N1_34 C1A_34 C2_34 C3_34 -80.7(7) . . . . ? 
C6_34 C1A_34 C2_34 C3_34 155.0(6) . . . . ? 
C1A_34 C2_34 C3_34 C5_34 64.5(9) . . . . ? 
C1A_34 C2_34 C3_34 C4_34 -170.4(6) . . . . ? 
N1_34 C1A_34 C6_34 O6_34 148.0(6) . . . . ? 
C2_34 C1A_34 C6_34 O6_34 -87.4(7) . . . . ? 
N1_34 C1A_34 C6_34 N1_35 -36.7(8) . . . . ? 
C2_34 C1A_34 C6_34 N1_35 87.8(7) . . . . ? 
O6_34 C6_34 N1_35 C1A_35 -2.0(10) . . . . ? 
C1A_34 C6_34 N1_35 C1A_35 -177.3(6) . . . . ? 
C6_34 N1_35 C1A_35 C2_35 172.4(7) . . . . ? 
C6_34 N1_35 C1A_35 C6_35 -65.2(9) . . . . ? 
N1_35 C1A_35 C2_35 C3_35 -178.9(9) . . . . ? 
C6_35 C1A_35 C2_35 C3_35 57.3(12) . . . . ? 
C1A_35 C2_35 C3_35 C5_35 58.6(14) . . . . ? 
C1A_35 C2_35 C3_35 C4_35 -174.6(10) . . . . ? 
N1_35 C1A_35 C6_35 O6_35 139.1(7) . . . . ? 
C2_35 C1A_35 C6_35 O6_35 -99.5(9) . . . . ? 
N1_35 C1A_35 C6_35 N1_36 -42.3(9) . . . . ? 
C2_35 C1A_35 C6_35 N1_36 79.0(9) . . . . ? 
O6_35 C6_35 N1_36 C1A_36 4.5(12) . . . . ? 
C1A_35 C6_35 N1_36 C1A_36 -174.0(7) . . . . ? 
C6_35 N1_36 C1A_36 C6_36 -56.9(12) . . . . ? 
C6_35 N1_36 C1A_36 C2_36 -177.2(8) . . . . ? 
C6_35 N1_36 C1A_36 C5_36 68.3(11) . . . . ? 
N1_36 C1A_36 C2_36 C3_36 -93.1(9) . . . . ? 
C6_36 C1A_36 C2_36 C3_36 143.7(9) . . . . ? 
C5_36 C1A_36 C2_36 C3_36 25.5(11) . . . . ? 
C1A_36 C2_36 C3_36 O3_36 -122.4(10) . . . . ? 
C1A_36 C2_36 C3_36 C4_36 3.2(12) . . . . ? 
C2_36 C3_36 O3_36 C7_36 -158.4(13) . . . . ? 
C4_36 C3_36 O3_36 C7_36 80.3(16) . . . . ? 
O3_36 C3_36 C4_36 C5_36 86.9(13) . . . . ? 
C2_36 C3_36 C4_36 C5_36 -33.4(13) . . . . ? 
C3_36 C4_36 C5_36 C1A_36 48.5(11) . . . . ? 
N1_36 C1A_36 C5_36 C4_36 62.8(12) . . . . ? 
C6_36 C1A_36 C5_36 C4_36 -169.9(11) . . . . ? 
C2_36 C1A_36 C5_36 C4_36 -52.1(12) . . . . ? 
N1_36 C1A_36 C6_36 O6_36 143.1(12) . . . . ? 
C2_36 C1A_36 C6_36 O6_36 -98.4(14) . . . . ? 
C5_36 C1A_36 C6_36 O6_36 17.0(16) . . . . ? 
N1_36 C1A_36 C6_36 O8_36 -37.7(14) . . . . ? 
C2_36 C1A_36 C6_36 O8_36 80.8(12) . . . . ? 
C5_36 C1A_36 C6_36 O8_36 -163.8(10) . . . . ? 
O6_36 C6_36 O8_36 C8_36 13.8(19) . . . . ? 
C1A_36 C6_36 O8_36 C8_36 -165.5(12) . . . . ? 
 
_diffrn_measured_fraction_theta_max    0.998 
_diffrn_reflns_theta_full              24.71 
_diffrn_measured_fraction_theta_full   0.998 
_refine_diff_density_max    1.136 
_refine_diff_density_min   -0.401 
_refine_diff_density_rms    0.078 

#===END

 
data_nano1 
 
_audit_creation_method            SHELXL-97 
_chemical_name_systematic 
; 
 Boc-{L-Leu-L-Leu-[(1S,3S)-Ac5c(OM)]}3-OMe
; 
_chemical_name_common             ? 
_chemical_melting_point           235 
_chemical_formula_moiety          'C63 H111 N9 O15, 2(H2 O) '
_chemical_formula_sum 
 'C63 H115 N9 O17' 
_chemical_formula_weight          1270.65 

_chemical_compound_source         synthesis
_chemical_absolute_configuration  rm 
 
loop_ 
 _atom_type_symbol 
 _atom_type_description 
 _atom_type_scat_dispersion_real 
 _atom_type_scat_dispersion_imag 
 _atom_type_scat_source 
 'C'  'C'   0.0033   0.0016 
 'International Tables Vol C Tables 4.2.6.8 and 6.1.1.4' 
 'H'  'H'   0.0000   0.0000 
 'International Tables Vol C Tables 4.2.6.8 and 6.1.1.4' 
 'N'  'N'   0.0061   0.0033 
 'International Tables Vol C Tables 4.2.6.8 and 6.1.1.4' 
 'O'  'O'   0.0106   0.0060 
 'International Tables Vol C Tables 4.2.6.8 and 6.1.1.4' 
 
_symmetry_cell_setting            orthorhombic 
_symmetry_space_group_name_H-M    'P 21 21 21' 
_symmetry_space_group_name_Hall   'P 2ac 2ab '
 
loop_ 
 _symmetry_equiv_pos_as_xyz 
 'x, y, z' 
 '-x+1/2, -y, z+1/2' 
 'x+1/2, -y+1/2, -z' 
 '-x, y+1/2, -z+1/2' 
 
_cell_length_a                    12.247(2) 
_cell_length_b                    15.641(3) 
_cell_length_c                    77.051(15) 
_cell_angle_alpha                 90.00 
_cell_angle_beta                  90.00 
_cell_angle_gamma                 90.00 
_cell_volume                      14759(5) 
_cell_formula_units_Z             8 
_cell_measurement_temperature     240(2) 
_cell_measurement_reflns_used    9130
_cell_measurement_theta_min        2.11
_cell_measurement_theta_max       20.48
 
_exptl_crystal_description        plate
_exptl_crystal_colour             colorless
_exptl_crystal_size_max           0.40 
_exptl_crystal_size_mid           0.40 
_exptl_crystal_size_min           0.02 
_exptl_crystal_density_meas       ? 
_exptl_crystal_density_diffrn     1.144 
_exptl_crystal_density_method     'not measured' 
_exptl_crystal_F_000              5536 
_exptl_absorpt_coefficient_mu     0.083 
_exptl_absorpt_correction_type    empirical 
_exptl_absorpt_correction_T_min   0.968 
_exptl_absorpt_correction_T_max   0.543 
_exptl_absorpt_process_details    'SADABS (Sheldrick, 1996)' 
 
_exptl_special_details 
; 
 ? 
; 
 
_diffrn_ambient_temperature       240(2) 
_diffrn_radiation_wavelength      0.71073 
_diffrn_radiation_type            MoK\a 
_diffrn_radiation_source          'MacScience M18XCE (rotating anode)'
_diffrn_radiation_monochromator   
                     'Bruker AXS Montel (conforcal multilayer optics)'
_diffrn_measurement_device_type   'Bruker AXS SMART APEX (CCD area detector)'
_diffrn_measurement_method        \w-scan
_diffrn_detector_area_resol_mean  8.366
_diffrn_standards_number          192 
_diffrn_standards_interval_count  75027 
_diffrn_standards_interval_time   720 
_diffrn_standards_decay_%         0.5 
_diffrn_reflns_number             75027 
_diffrn_reflns_av_R_equivalents   0.0949 
_diffrn_reflns_av_sigmaI/netI     0.0442 
_diffrn_reflns_limit_h_min        -12 
_diffrn_reflns_limit_h_max        12 
_diffrn_reflns_limit_k_min        -15 
_diffrn_reflns_limit_k_max        15 
_diffrn_reflns_limit_l_min        -77 
_diffrn_reflns_limit_l_max        77 
_diffrn_reflns_theta_min          1.06 
_diffrn_reflns_theta_max          20.82 
_reflns_number_total              8620 
_reflns_number_gt                 7280 
_reflns_threshold_expression      I>2\s(I) 
 
_computing_data_collection        'SMART (Bruker, 1998)'
_computing_cell_refinement        'SMART (Bruker, 1998)'
_computing_data_reduction         'SAINTPLUS (Bruker, 1998)' 
_computing_structure_solution     'SHELXD (Seldrick & Gould, 1996)'
_computing_structure_refinement   'SHELXL-97 (Sheldrick, 1997)' 
_computing_molecular_graphics     'PLATON (Spek, 2003)'
_computing_publication_material   'SHELXL-97 (Sheldrick, 1997)'  
 
_refine_special_details 
; 
  In the absence of significant anomalous scattering effects, Friedel pairs 
  were merged, and the absolute configuration is assumed from that of the 
  starting material.
; 
 
_refine_ls_structure_factor_coef  Fsqd  
_refine_ls_matrix_type            fullcycle 
_refine_ls_weighting_scheme       calc  
_refine_ls_weighting_details 
 'calc w=1/[\s^2^(Fo^2^)+(0.1269P)^2^+18.7208P] where P=(Fo^2^+2Fc^2^)/3' 
_atom_sites_solution_primary      direct 
_atom_sites_solution_secondary    difmap 
_atom_sites_solution_hydrogens    geom 
_refine_ls_hydrogen_treatment     constr 
_refine_ls_extinction_method      none 
_refine_ls_extinction_coef        ? 
_refine_ls_abs_structure_details 'Flack (1983), 0 Friedel pairs'
# 'Flack H D (1983), Acta Cryst. A39, 876-881' 
_refine_ls_abs_structure_Flack    3(2) 
_refine_ls_number_reflns          8620 
_refine_ls_number_parameters      1603 
_refine_ls_number_restraints      136 
_refine_ls_R_factor_all           0.0948 
_refine_ls_R_factor_gt            0.0830 
_refine_ls_wR_factor_ref          0.2274 
_refine_ls_wR_factor_gt           0.2190 
_refine_ls_goodness_of_fit_ref    1.089 
_refine_ls_restrained_S_all       1.099 
_refine_ls_shift/su_max           0.013 
_refine_ls_shift/su_mean          0.004 
 
loop_ 
 _atom_site_label 
 _atom_site_type_symbol 
 _atom_site_fract_x 
 _atom_site_fract_y 
 _atom_site_fract_z 
 _atom_site_U_iso_or_equiv 
 _atom_site_adp_type 
 _atom_site_occupancy 
 _atom_site_symmetry_multiplicity 
 _atom_site_calc_flag 
 _atom_site_refinement_flags 
 _atom_site_disorder_assembly 
 _atom_site_disorder_group 
C1_10 C 1.0770(9) 0.2369(7) 0.15722(14) 0.068(3) Uani 1 1 d . . . 
C2_10 C 1.1328(10) 0.2465(8) 0.17433(18) 0.096(4) Uani 1 1 d . . . 
H2A_10 H 1.1211 0.3039 0.1787 0.144 Uiso 1 1 calc R . . 
H2B_10 H 1.2105 0.2365 0.1729 0.144 Uiso 1 1 calc R . . 
H2C_10 H 1.1031 0.2053 0.1825 0.144 Uiso 1 1 calc R . . 
C3_10 C 1.0937(10) 0.1489(7) 0.15036(17) 0.091(4) Uani 1 1 d . . . 
H3A_10 H 1.0563 0.1430 0.1393 0.136 Uiso 1 1 calc R . . 
H3B_10 H 1.0647 0.1077 0.1586 0.136 Uiso 1 1 calc R . . 
H3C_10 H 1.1712 0.1386 0.1487 0.136 Uiso 1 1 calc R . . 
C4_10 C 1.1138(12) 0.3060(8) 0.1448(2) 0.118(5) Uani 1 1 d . . . 
H4A_10 H 1.0771 0.2988 0.1338 0.176 Uiso 1 1 calc R . . 
H4B_10 H 1.1922 0.3019 0.1432 0.176 Uiso 1 1 calc R . . 
H4C_10 H 1.0959 0.3616 0.1496 0.176 Uiso 1 1 calc R . . 
O1_10 O 0.9569(5) 0.2393(4) 0.15929(8) 0.0585(17) Uani 1 1 d . . . 
C5_10 C 0.9059(8) 0.3084(7) 0.16417(13) 0.054(3) Uani 1 1 d . . . 
O5_10 O 0.9462(6) 0.3782(4) 0.16744(9) 0.0666(19) Uani 1 1 d . . . 
N1_11 N 0.7979(7) 0.2942(5) 0.16485(9) 0.053(2) Uani 1 1 d . . . 
H1_11 H 0.7736 0.2420 0.1642 0.064 Uiso 1 1 calc R . . 
C1_11 C 0.7197(8) 0.3652(6) 0.16676(12) 0.054(3) Uani 1 1 d D . . 
H1A_11 H 0.7351 0.4071 0.1574 0.065 Uiso 1 1 calc R . . 
C2_11 C 0.6028(8) 0.3340(6) 0.16435(14) 0.065(3) Uani 1 1 d D . . 
H2A_11 H 0.5978 0.3040 0.1532 0.078 Uiso 1 1 calc R . . 
H2B_11 H 0.5863 0.2925 0.1735 0.078 Uiso 1 1 calc R . . 
C3_11 C 0.5177(8) 0.4032(6) 0.16474(15) 0.073(3) Uani 1 1 d D . . 
H3_11 H 0.5212 0.4314 0.1762 0.088 Uiso 1 1 calc R . . 
C4_11 C 0.5362(11) 0.4713(8) 0.15089(17) 0.106(4) Uani 1 1 d D . . 
H4A_11 H 0.4807 0.5153 0.1519 0.159 Uiso 1 1 calc R . . 
H4B_11 H 0.5319 0.4453 0.1395 0.159 Uiso 1 1 calc R . . 
H4C_11 H 0.6078 0.4967 0.1525 0.159 Uiso 1 1 calc R . . 
C5_11 C 0.4042(9) 0.3626(8) 0.1629(2) 0.105(4) Uani 1 1 d D . . 
H5A_11 H 0.3489 0.4070 0.1632 0.157 Uiso 1 1 calc R . . 
H5B_11 H 0.3920 0.3228 0.1723 0.157 Uiso 1 1 calc R . . 
H5C_11 H 0.3999 0.3324 0.1519 0.157 Uiso 1 1 calc R . . 
C6_11 C 0.7304(8) 0.4109(6) 0.18381(13) 0.056(3) Uani 1 1 d . . . 
O6_11 O 0.7092(6) 0.4884(4) 0.18415(9) 0.0669(19) Uani 1 1 d . . . 
N1_12 N 0.7573(6) 0.3689(5) 0.19825(10) 0.057(2) Uani 1 1 d . . . 
H1_12 H 0.7713 0.3144 0.1978 0.068 Uiso 1 1 calc R . . 
C1_12 C 0.7633(9) 0.4144(6) 0.21465(12) 0.061(3) Uani 1 1 d D . . 
H1A_12 H 0.6914 0.4417 0.2165 0.073 Uiso 1 1 calc R . . 
C2_12 C 0.7821(10) 0.3558(6) 0.22963(11) 0.069(3) Uani 1 1 d D . . 
H2A_12 H 0.8547 0.3301 0.2284 0.083 Uiso 1 1 calc R . . 
H2B_12 H 0.7284 0.3094 0.2291 0.083 Uiso 1 1 calc R . . 
C3_12 C 0.7745(11) 0.3978(8) 0.24721(13) 0.090(4) Uani 1 1 d D . . 
H3_12 H 0.8253 0.4471 0.2472 0.108 Uiso 1 1 calc R . . 
C4_12 C 0.6630(13) 0.4319(11) 0.25122(19) 0.137(6) Uani 1 1 d D . . 
H4A_12 H 0.6400 0.4702 0.2420 0.205 Uiso 1 1 calc R . . 
H4B_12 H 0.6649 0.4628 0.2621 0.205 Uiso 1 1 calc R . . 
H4C_12 H 0.6118 0.3848 0.2521 0.205 Uiso 1 1 calc R . . 
C5_12 C 0.8138(13) 0.3363(11) 0.26108(17) 0.133(6) Uani 1 1 d D . . 
H5A_12 H 0.8860 0.3156 0.2581 0.200 Uiso 1 1 calc R . . 
H5B_12 H 0.7637 0.2884 0.2618 0.200 Uiso 1 1 calc R . . 
H5C_12 H 0.8166 0.3655 0.2722 0.200 Uiso 1 1 calc R . . 
C6_12 C 0.8481(10) 0.4866(7) 0.21338(13) 0.064(3) Uani 1 1 d . . . 
O6_12 O 0.8291(6) 0.5586(4) 0.21827(9) 0.0667(19) Uani 1 1 d . . . 
N1_13 N 0.9457(7) 0.4636(5) 0.20709(10) 0.058(2) Uani 1 1 d . . . 
H1_13 H 0.9567 0.4102 0.2045 0.069 Uiso 1 1 calc R . . 
C1_13 C 1.0342(8) 0.5246(6) 0.20445(13) 0.058(3) Uani 1 1 d . . . 
C2_13 C 1.1322(9) 0.4777(7) 0.19732(16) 0.084(3) Uani 1 1 d U . . 
H2A_13 H 1.1077 0.4328 0.1894 0.100 Uiso 1 1 calc R . . 
H2B_13 H 1.1781 0.5177 0.1908 0.100 Uiso 1 1 calc R . . 
C3_13 C 1.1962(12) 0.4395(9) 0.2114(2) 0.114(4) Uani 1 1 d U . . 
H3_13 H 1.1842 0.3769 0.2118 0.136 Uiso 1 1 calc R . . 
C4_13 C 1.1550(14) 0.4796(11) 0.2272(2) 0.131(5) Uani 1 1 d U . . 
H4A_13 H 1.2162 0.5006 0.2342 0.158 Uiso 1 1 calc R . . 
H4B_13 H 1.1144 0.4376 0.2341 0.158 Uiso 1 1 calc R . . 
C5_13 C 1.0794(11) 0.5547(7) 0.22229(14) 0.081(3) Uani 1 1 d . . . 
H5A_13 H 1.1204 0.6083 0.2212 0.097 Uiso 1 1 calc R . . 
H5B_13 H 1.0207 0.5622 0.2308 0.097 Uiso 1 1 calc R . . 
O3_13 O 1.3121(9) 0.4587(10) 0.2066(2) 0.178(5) Uani 1 1 d U . . 
C7_13 C 1.3871(16) 0.4137(19) 0.2151(4) 0.247(15) Uani 1 1 d U . . 
H7A_13 H 1.4592 0.4299 0.2110 0.370 Uiso 1 1 calc R . . 
H7B_13 H 1.3756 0.3532 0.2129 0.370 Uiso 1 1 calc R . . 
H7C_13 H 1.3811 0.4251 0.2274 0.370 Uiso 1 1 calc R . . 
C6_13 C 0.9980(8) 0.5965(7) 0.19357(13) 0.057(3) Uani 1 1 d . . . 
O6_13 O 1.0128(6) 0.6720(4) 0.19714(9) 0.0685(19) Uani 1 1 d . . . 
N1_14 N 0.9526(6) 0.5735(5) 0.17839(10) 0.055(2) Uani 1 1 d . . . 
H1_14 H 0.9407 0.5196 0.1763 0.066 Uiso 1 1 calc R . . 
C1_14 C 0.9225(8) 0.6374(6) 0.16516(12) 0.056(2) Uani 1 1 d DU . . 
H1A_14 H 0.9876 0.6729 0.1627 0.068 Uiso 1 1 calc R . . 
C2_14 C 0.8884(10) 0.5957(7) 0.14866(13) 0.076(3) Uani 1 1 d DU . . 
H2A_14 H 0.8548 0.6392 0.1412 0.091 Uiso 1 1 calc R . . 
H2B_14 H 0.8321 0.5532 0.1513 0.091 Uiso 1 1 calc R . . 
C3_14 C 0.9779(12) 0.5521(7) 0.13845(15) 0.101(4) Uani 1 1 d DU . . 
H3_14 H 1.0165 0.5116 0.1462 0.121 Uiso 1 1 calc R . . 
C4_14 C 0.9272(16) 0.5015(10) 0.12336(18) 0.157(7) Uani 1 1 d DU . . 
H4A_14 H 0.8743 0.4611 0.1279 0.236 Uiso 1 1 calc R . . 
H4B_14 H 0.9842 0.4709 0.1172 0.236 Uiso 1 1 calc R . . 
H4C_14 H 0.8911 0.5407 0.1155 0.236 Uiso 1 1 calc R . . 
C5_14 C 1.0578(16) 0.6170(11) 0.1320(3) 0.186(9) Uani 1 1 d DU . . 
H5A_14 H 1.1168 0.5883 0.1260 0.279 Uiso 1 1 calc R . . 
H5B_14 H 1.0871 0.6486 0.1418 0.279 Uiso 1 1 calc R . . 
H5C_14 H 1.0213 0.6561 0.1242 0.279 Uiso 1 1 calc R . . 
C6_14 C 0.8329(9) 0.6954(6) 0.17158(13) 0.060(3) Uani 1 1 d . . . 
O6_14 O 0.8386(6) 0.7748(4) 0.16830(9) 0.0703(19) Uani 1 1 d . . . 
N1_15 N 0.7488(7) 0.6636(5) 0.17975(11) 0.061(2) Uani 1 1 d . . . 
H1_15 H 0.7463 0.6089 0.1817 0.073 Uiso 1 1 calc R . . 
C1_15 C 0.6606(9) 0.7165(6) 0.18552(13) 0.062(3) Uani 1 1 d DU . . 
H1A_15 H 0.6401 0.7530 0.1755 0.075 Uiso 1 1 calc R . . 
C2_15 C 0.5638(10) 0.6641(8) 0.1896(2) 0.103(4) Uani 1 1 d DU . . 
H2A_15 H 0.5750 0.6373 0.2010 0.124 Uiso 1 1 calc R . . 
H2B_15 H 0.5583 0.6182 0.1810 0.124 Uiso 1 1 calc R . . 
C3_15 C 0.4530(10) 0.7137(11) 0.1900(2) 0.142(6) Uani 1 1 d DU . . 
H3_15 H 0.4553 0.7648 0.1824 0.170 Uiso 1 1 calc R . . 
C4_15 C 0.4327(17) 0.7372(19) 0.2081(3) 0.240(13) Uani 1 1 d DU . . 
H4A_15 H 0.4887 0.7767 0.2120 0.359 Uiso 1 1 calc R . . 
H4B_15 H 0.4344 0.6862 0.2153 0.359 Uiso 1 1 calc R . . 
H4C_15 H 0.3616 0.7641 0.2091 0.359 Uiso 1 1 calc R . . 
C5_15 C 0.3652(15) 0.6518(16) 0.1843(4) 0.234(12) Uani 1 1 d DU . . 
H5A_15 H 0.3751 0.6382 0.1721 0.350 Uiso 1 1 calc R . . 
H5B_15 H 0.2940 0.6776 0.1860 0.350 Uiso 1 1 calc R . . 
H5C_15 H 0.3703 0.5998 0.1911 0.350 Uiso 1 1 calc R . . 
C6_15 C 0.6988(8) 0.7767(7) 0.19975(14) 0.059(3) Uani 1 1 d . . . 
O6_15 O 0.6735(6) 0.8533(4) 0.19953(9) 0.0653(18) Uani 1 1 d . . . 
N1_16 N 0.7622(7) 0.7433(5) 0.21200(11) 0.062(2) Uani 1 1 d . . . 
H1_16 H 0.7783 0.6892 0.2116 0.074 Uiso 1 1 calc R . . 
C1_16 C 0.8065(9) 0.7960(6) 0.22645(12) 0.061(3) Uani 1 1 d . . . 
C2_16 C 0.8780(10) 0.7437(6) 0.23790(13) 0.070(3) Uani 1 1 d . . . 
H2A_16 H 0.9221 0.7044 0.2309 0.084 Uiso 1 1 calc R . . 
H2B_16 H 0.9274 0.7809 0.2444 0.084 Uiso 1 1 calc R . . 
C3_16 C 0.8075(12) 0.6947(8) 0.25000(14) 0.085(4) Uani 1 1 d . . . 
H3_16 H 0.7926 0.6372 0.2452 0.102 Uiso 1 1 calc R . . 
O3_16 O 0.8649(10) 0.6875(7) 0.26618(11) 0.124(3) Uani 1 1 d . . . 
C7_16 C 0.8115(16) 0.6334(11) 0.27824(17) 0.143(7) Uani 1 1 d . . . 
H7A_16 H 0.8520 0.6328 0.2891 0.215 Uiso 1 1 calc R . . 
H7B_16 H 0.8077 0.5759 0.2736 0.215 Uiso 1 1 calc R . . 
H7C_16 H 0.7382 0.6545 0.2803 0.215 Uiso 1 1 calc R . . 
C4_16 C 0.7092(17) 0.7431(11) 0.2508(2) 0.165(9) Uani 1 1 d . . . 
H4A_16 H 0.6962 0.7613 0.2628 0.198 Uiso 1 1 calc R . . 
H4B_16 H 0.6478 0.7069 0.2472 0.198 Uiso 1 1 calc R . . 
C5_16 C 0.7145(10) 0.8221(7) 0.23899(13) 0.078(3) Uani 1 1 d . . . 
H5A_16 H 0.7335 0.8737 0.2455 0.094 Uiso 1 1 calc R . . 
H5B_16 H 0.6454 0.8314 0.2328 0.094 Uiso 1 1 calc R . . 
C6_16 C 0.8686(9) 0.8722(7) 0.21872(14) 0.061(3) Uani 1 1 d . . . 
O6_16 O 0.8666(7) 0.9435(5) 0.22512(9) 0.078(2) Uani 1 1 d . . . 
N1_17 N 0.9330(7) 0.8538(5) 0.20512(10) 0.054(2) Uani 1 1 d . . . 
H1_17 H 0.9314 0.8023 0.2008 0.065 Uiso 1 1 calc R . . 
C1_17 C 1.0052(7) 0.9166(5) 0.19733(11) 0.045(2) Uani 1 1 d D . . 
H1A_17 H 1.0471 0.9456 0.2066 0.054 Uiso 1 1 calc R . . 
C2_17 C 1.0835(8) 0.8690(6) 0.18571(13) 0.061(3) Uani 1 1 d D . . 
H2A_17 H 1.0406 0.8341 0.1776 0.073 Uiso 1 1 calc R . . 
H2B_17 H 1.1261 0.8298 0.1929 0.073 Uiso 1 1 calc R . . 
C3_17 C 1.1624(8) 0.9225(7) 0.17518(13) 0.070(3) Uani 1 1 d D . . 
H3_17 H 1.1197 0.9656 0.1687 0.084 Uiso 1 1 calc R . . 
C4_17 C 1.2241(12) 0.8673(9) 0.16203(17) 0.113(5) Uani 1 1 d D . . 
H4A_17 H 1.2742 0.9029 0.1555 0.169 Uiso 1 1 calc R . . 
H4B_17 H 1.1724 0.8407 0.1542 0.169 Uiso 1 1 calc R . . 
H4C_17 H 1.2648 0.8233 0.1681 0.169 Uiso 1 1 calc R . . 
C5_17 C 1.2426(11) 0.9700(9) 0.18709(17) 0.107(4) Uani 1 1 d D . . 
H5A_17 H 1.2914 1.0046 0.1801 0.161 Uiso 1 1 calc R . . 
H5B_17 H 1.2847 0.9288 0.1937 0.161 Uiso 1 1 calc R . . 
H5C_17 H 1.2022 1.0065 0.1950 0.161 Uiso 1 1 calc R . . 
C6_17 C 0.9444(8) 0.9825(6) 0.18701(12) 0.048(2) Uani 1 1 d . . . 
O6_17 O 0.9697(6) 1.0582(4) 0.18794(8) 0.0609(17) Uani 1 1 d . . . 
N1_18 N 0.8662(6) 0.9558(5) 0.17631(10) 0.053(2) Uani 1 1 d . . . 
H1_18 H 0.8451 0.9028 0.1769 0.063 Uiso 1 1 calc R . . 
C1_18 C 0.8148(8) 1.0123(6) 0.16375(11) 0.052(3) Uani 1 1 d D . . 
H1A_18 H 0.8709 1.0538 0.1599 0.063 Uiso 1 1 calc R . . 
C2_18 C 0.7762(8) 0.9637(6) 0.14755(13) 0.066(3) Uani 1 1 d D . . 
H2A_18 H 0.7139 0.9941 0.1425 0.080 Uiso 1 1 calc R . . 
H2B_18 H 0.7509 0.9068 0.1511 0.080 Uiso 1 1 calc R . . 
C3_18 C 0.8652(10) 0.9536(9) 0.13356(14) 0.094(4) Uani 1 1 d D . . 
H3_18 H 0.8894 1.0117 0.1302 0.113 Uiso 1 1 calc R . . 
C4_18 C 0.8161(12) 0.9127(11) 0.11766(16) 0.122(5) Uani 1 1 d D . . 
H4A_18 H 0.7542 0.9464 0.1138 0.182 Uiso 1 1 calc R . . 
H4B_18 H 0.7920 0.8553 0.1205 0.182 Uiso 1 1 calc R . . 
H4C_18 H 0.8704 0.9103 0.1085 0.182 Uiso 1 1 calc R . . 
C5_18 C 0.9625(12) 0.9060(11) 0.13902(19) 0.128(5) Uani 1 1 d D . . 
H5A_18 H 0.9935 0.9327 0.1493 0.191 Uiso 1 1 calc R . . 
H5B_18 H 1.0159 0.9063 0.1297 0.191 Uiso 1 1 calc R . . 
H5C_18 H 0.9423 0.8475 0.1417 0.191 Uiso 1 1 calc R . . 
C6_18 C 0.7214(8) 1.0628(6) 0.17112(13) 0.051(2) Uani 1 1 d . . . 
O6_18 O 0.6959(5) 1.1320(4) 0.16483(9) 0.0645(18) Uani 1 1 d . . . 
N1_19 N 0.6639(7) 1.0277(5) 0.18414(11) 0.061(2) Uani 1 1 d . . . 
H1_19 H 0.6845 0.9796 0.1888 0.074 Uiso 1 1 calc R . . 
C1_19 C 0.5660(9) 1.0716(6) 0.19047(15) 0.070(3) Uani 1 1 d . . . 
C2_19 C 0.5957(10) 1.1515(7) 0.20151(15) 0.082(3) Uani 1 1 d U . . 
H2A_19 H 0.6608 1.1797 0.1968 0.098 Uiso 1 1 calc R . . 
H2B_19 H 0.5352 1.1926 0.2015 0.098 Uiso 1 1 calc R . . 
C3_19 C 0.6173(12) 1.1194(7) 0.21969(17) 0.091(3) Uani 1 1 d U . . 
H3_19 H 0.6963 1.1230 0.2224 0.109 Uiso 1 1 calc R . . 
O3_19 O 0.5572(11) 1.1707(6) 0.23126(13) 0.139(4) Uani 1 1 d U . . 
C4_19 C 0.5792(11) 1.0263(7) 0.22042(16) 0.088(3) Uani 1 1 d U . . 
H4A_19 H 0.5372 1.0157 0.2310 0.106 Uiso 1 1 calc R . . 
H4B_19 H 0.6418 0.9873 0.2202 0.106 Uiso 1 1 calc R . . 
C5_19 C 0.5075(9) 1.0135(7) 0.20436(15) 0.075(3) Uani 1 1 d . . . 
H5A_19 H 0.4325 1.0325 0.2065 0.091 Uiso 1 1 calc R . . 
H5B_19 H 0.5067 0.9535 0.2007 0.091 Uiso 1 1 calc R . . 
C7_19 C 0.588(3) 1.1523(15) 0.2484(2) 0.233(14) Uani 1 1 d U . . 
H7A_19 H 0.5465 1.1880 0.2563 0.350 Uiso 1 1 calc R . . 
H7B_19 H 0.6652 1.1634 0.2499 0.350 Uiso 1 1 calc R . . 
H7C_19 H 0.5730 1.0926 0.2509 0.350 Uiso 1 1 calc R . . 
C6_19 C 0.4890(10) 1.0933(9) 0.17544(19) 0.081(3) Uani 1 1 d . . . 
O6_19 O 0.4282(8) 1.1529(6) 0.17559(14) 0.110(3) Uani 1 1 d . . . 
O8_19 O 0.4947(6) 1.0355(6) 0.16302(13) 0.091(3) Uani 1 1 d . . . 
C8_19 C 0.4339(14) 1.0558(11) 0.1467(2) 0.141(6) Uani 1 1 d . . . 
H8A_19 H 0.4425 1.0092 0.1385 0.212 Uiso 1 1 calc R . . 
H8B_19 H 0.4627 1.1080 0.1416 0.212 Uiso 1 1 calc R . . 
H8C_19 H 0.3570 1.0635 0.1493 0.212 Uiso 1 1 calc R . . 
C1_20 C 0.7368(9) 1.2245(7) 0.10309(13) 0.068(3) Uani 1 1 d . . . 
C2_20 C 0.8198(10) 1.1735(9) 0.09289(18) 0.104(4) Uani 1 1 d . . . 
H2A_20 H 0.8159 1.1894 0.0807 0.155 Uiso 1 1 calc R . . 
H2B_20 H 0.8043 1.1130 0.0941 0.155 Uiso 1 1 calc R . . 
H2C_20 H 0.8924 1.1854 0.0973 0.155 Uiso 1 1 calc R . . 
C3_20 C 0.7533(11) 1.3194(8) 0.1001(2) 0.109(5) Uani 1 1 d . . . 
H3A_20 H 0.7508 1.3312 0.0877 0.163 Uiso 1 1 calc R . . 
H3B_20 H 0.8237 1.3365 0.1047 0.163 Uiso 1 1 calc R . . 
H3C_20 H 0.6960 1.3511 0.1059 0.163 Uiso 1 1 calc R . . 
C4_20 C 0.7402(13) 1.2010(11) 0.12230(15) 0.126(5) Uani 1 1 d . . . 
H4A_20 H 0.6861 1.2343 0.1285 0.188 Uiso 1 1 calc R . . 
H4B_20 H 0.8122 1.2132 0.1269 0.188 Uiso 1 1 calc R . . 
H4C_20 H 0.7244 1.1406 0.1237 0.188 Uiso 1 1 calc R . . 
O1_20 O 0.6272(5) 1.2110(4) 0.09603(9) 0.0612(18) Uani 1 1 d . . . 
C5_20 C 0.5786(9) 1.1342(8) 0.09692(14) 0.066(3) Uani 1 1 d . . . 
O5_20 O 0.6203(7) 1.0676(5) 0.10089(12) 0.093(3) Uani 1 1 d . . . 
N1_21 N 0.4723(7) 1.1423(5) 0.09232(9) 0.0520(19) Uani 1 1 d . . . 
H1_21 H 0.4469 1.1919 0.0892 0.062 Uiso 1 1 calc R . . 
C1_21 C 0.4013(8) 1.0688(6) 0.09254(13) 0.056(3) Uani 1 1 d D . . 
H1A_21 H 0.4204 1.0343 0.1029 0.067 Uiso 1 1 calc R . . 
C2_21 C 0.2832(8) 1.0978(6) 0.09459(15) 0.069(3) Uani 1 1 d D . . 
H2A_21 H 0.2773 1.1320 0.1052 0.083 Uiso 1 1 calc R . . 
H2B_21 H 0.2644 1.1349 0.0848 0.083 Uiso 1 1 calc R . . 
C3_21 C 0.2009(8) 1.0257(6) 0.09547(14) 0.071(3) Uani 1 1 d D . . 
H3_21 H 0.2079 0.9918 0.0847 0.085 Uiso 1 1 calc R . . 
C4_21 C 0.0851(8) 1.0621(9) 0.09604(16) 0.094(4) Uani 1 1 d D . . 
H4A_21 H 0.0750 1.1016 0.0865 0.141 Uiso 1 1 calc R . . 
H4B_21 H 0.0741 1.0920 0.1069 0.141 Uiso 1 1 calc R . . 
H4C_21 H 0.0327 1.0158 0.0951 0.141 Uiso 1 1 calc R . . 
C5_21 C 0.2204(11) 0.9664(8) 0.11049(16) 0.099(4) Uani 1 1 d D . . 
H5A_21 H 0.1682 0.9198 0.1101 0.149 Uiso 1 1 calc R . . 
H5B_21 H 0.2116 0.9976 0.1213 0.149 Uiso 1 1 calc R . . 
H5C_21 H 0.2939 0.9436 0.1098 0.149 Uiso 1 1 calc R . . 
C6_21 C 0.4122(8) 1.0116(7) 0.07678(13) 0.055(2) Uani 1 1 d . . . 
O6_21 O 0.4109(6) 0.9335(4) 0.07811(8) 0.0601(17) Uani 1 1 d . . . 
N1_22 N 0.4190(7) 1.0497(5) 0.06147(10) 0.057(2) Uani 1 1 d . . . 
H1_22 H 0.4179 1.1052 0.0609 0.068 Uiso 1 1 calc R . . 
C1_22 C 0.4282(9) 0.9994(6) 0.04574(11) 0.057(3) Uani 1 1 d D . . 
H1A_22 H 0.3622 0.9629 0.0452 0.069 Uiso 1 1 calc R . . 
C2_22 C 0.4247(10) 1.0559(6) 0.03006(11) 0.066(3) Uani 1 1 d D . . 
H2A_22 H 0.4867 1.0955 0.0306 0.080 Uiso 1 1 calc R . . 
H2B_22 H 0.3578 1.0902 0.0305 0.080 Uiso 1 1 calc R . . 
C3_22 C 0.4283(11) 1.0084(7) 0.01283(13) 0.082(3) Uani 1 1 d D . . 
H3_22 H 0.4959 0.9738 0.0126 0.099 Uiso 1 1 calc R . . 
C4_22 C 0.3321(13) 0.9490(10) 0.0096(2) 0.130(5) Uani 1 1 d D . . 
H4A_22 H 0.3293 0.9060 0.0187 0.196 Uiso 1 1 calc R . . 
H4B_22 H 0.3407 0.9213 -0.0016 0.196 Uiso 1 1 calc R . . 
H4C_22 H 0.2649 0.9818 0.0097 0.196 Uiso 1 1 calc R . . 
C5_22 C 0.4340(16) 1.0726(8) -0.00179(14) 0.125(6) Uani 1 1 d D . . 
H5A_22 H 0.4989 1.1075 -0.0005 0.187 Uiso 1 1 calc R . . 
H5B_22 H 0.3698 1.1089 -0.0015 0.187 Uiso 1 1 calc R . . 
H5C_22 H 0.4369 1.0426 -0.0128 0.187 Uiso 1 1 calc R . . 
C6_22 C 0.5251(9) 0.9394(7) 0.04639(12) 0.055(2) Uani 1 1 d . . . 
O6_22 O 0.5157(6) 0.8664(4) 0.04141(8) 0.0628(18) Uani 1 1 d . . . 
N1_23 N 0.6172(7) 0.9707(5) 0.05306(9) 0.053(2) Uani 1 1 d . . . 
H1_23 H 0.6188 1.0234 0.0567 0.064 Uiso 1 1 calc R . . 
C1_23 C 0.7157(8) 0.9183(6) 0.05444(12) 0.054(3) Uani 1 1 d . . . 
C2_23 C 0.8038(8) 0.9673(6) 0.06458(12) 0.058(3) Uani 1 1 d . . . 
H2A_23 H 0.7703 1.0090 0.0724 0.069 Uiso 1 1 calc R . . 
H2B_23 H 0.8486 0.9278 0.0714 0.069 Uiso 1 1 calc R . . 
C3_23 C 0.8727(11) 1.0122(7) 0.05100(13) 0.073(3) Uani 1 1 d . . . 
H3_23 H 0.8689 1.0749 0.0527 0.088 Uiso 1 1 calc R . . 
O3_23 O 0.9790(7) 0.9837(6) 0.05356(11) 0.098(3) Uani 1 1 d . . . 
C7_23 C 1.0639(15) 1.0302(13) 0.0440(2) 0.162(8) Uani 1 1 d . . . 
H7A_23 H 1.1348 1.0058 0.0467 0.243 Uiso 1 1 calc R . . 
H7B_23 H 1.0630 1.0899 0.0474 0.243 Uiso 1 1 calc R . . 
H7C_23 H 1.0502 1.0257 0.0317 0.243 Uiso 1 1 calc R . . 
C4_23 C 0.8247(10) 0.9883(7) 0.03350(13) 0.077(3) Uani 1 1 d . . . 
H4A_23 H 0.7724 1.0315 0.0296 0.093 Uiso 1 1 calc R . . 
H4B_23 H 0.8823 0.9820 0.0247 0.093 Uiso 1 1 calc R . . 
C5_23 C 0.7686(9) 0.9040(6) 0.03685(12) 0.066(3) Uani 1 1 d . . . 
H5A_23 H 0.8214 0.8569 0.0373 0.079 Uiso 1 1 calc R . . 
H5B_23 H 0.7138 0.8917 0.0279 0.079 Uiso 1 1 calc R . . 
C6_23 C 0.6896(8) 0.8352(7) 0.06427(13) 0.056(3) Uani 1 1 d . . . 
O6_23 O 0.7204(6) 0.7645(4) 0.05929(8) 0.069(2) Uani 1 1 d . . . 
N1_24 N 0.6324(6) 0.8440(5) 0.07916(9) 0.0509(19) Uani 1 1 d . . . 
H1_24 H 0.6116 0.8946 0.0825 0.061 Uiso 1 1 calc R . . 
C1_24 C 0.6052(8) 0.7703(6) 0.08973(11) 0.055(2) Uani 1 1 d D . . 
H1A_24 H 0.6733 0.7404 0.0931 0.065 Uiso 1 1 calc R . . 
C2_24 C 0.5468(9) 0.8006(6) 0.10611(11) 0.063(3) Uani 1 1 d D . . 
H2A_24 H 0.4803 0.8310 0.1027 0.076 Uiso 1 1 calc R . . 
H2B_24 H 0.5940 0.8418 0.1121 0.076 Uiso 1 1 calc R . . 
C3_24 C 0.5153(11) 0.7300(8) 0.11908(14) 0.095(4) Uani 1 1 d D . . 
H3_24 H 0.4701 0.6881 0.1127 0.114 Uiso 1 1 calc R . . 
C4_24 C 0.4432(16) 0.7678(11) 0.13318(18) 0.158(7) Uani 1 1 d D . . 
H4A_24 H 0.4210 0.7229 0.1411 0.238 Uiso 1 1 calc R . . 
H4B_24 H 0.3790 0.7933 0.1279 0.238 Uiso 1 1 calc R . . 
H4C_24 H 0.4836 0.8112 0.1395 0.238 Uiso 1 1 calc R . . 
C5_24 C 0.6120(16) 0.6819(12) 0.1262(2) 0.174(8) Uani 1 1 d D . . 
H5A_24 H 0.6542 0.6584 0.1167 0.261 Uiso 1 1 calc R . . 
H5B_24 H 0.5866 0.6358 0.1336 0.261 Uiso 1 1 calc R . . 
H5C_24 H 0.6574 0.7205 0.1329 0.261 Uiso 1 1 calc R . . 
C6_24 C 0.5321(9) 0.7089(6) 0.07989(12) 0.057(3) Uani 1 1 d . . . 
O6_24 O 0.5503(6) 0.6313(4) 0.08051(9) 0.0699(19) Uani 1 1 d . . . 
N1_25 N 0.4484(7) 0.7413(5) 0.07121(10) 0.060(2) Uani 1 1 d . . . 
H1_25 H 0.4407 0.7965 0.0705 0.072 Uiso 1 1 calc R . . 
C1_25 C 0.3702(8) 0.6865(6) 0.06289(14) 0.063(3) Uani 1 1 d D . . 
H1A_25 H 0.3498 0.6419 0.0714 0.075 Uiso 1 1 calc R . . 
C2_25 C 0.2698(10) 0.7353(8) 0.05891(16) 0.087(4) Uani 1 1 d D . . 
H2A_25 H 0.2181 0.6964 0.0532 0.104 Uiso 1 1 calc R . . 
H2B_25 H 0.2885 0.7799 0.0505 0.104 Uiso 1 1 calc R . . 
C3_25 C 0.2116(11) 0.7776(9) 0.0741(2) 0.120(5) Uani 1 1 d D . . 
H3_25 H 0.2580 0.8255 0.0781 0.143 Uiso 1 1 calc R . . 
C4_25 C 0.1063(13) 0.8156(12) 0.0673(3) 0.183(9) Uani 1 1 d D . . 
H4A_25 H 0.0672 0.8430 0.0767 0.274 Uiso 1 1 calc R . . 
H4B_25 H 0.0615 0.7706 0.0624 0.274 Uiso 1 1 calc R . . 
H4C_25 H 0.1229 0.8575 0.0584 0.274 Uiso 1 1 calc R . . 
C5_25 C 0.1932(16) 0.7191(11) 0.0896(2) 0.158(7) Uani 1 1 d D . . 
H5A_25 H 0.2627 0.6966 0.0935 0.237 Uiso 1 1 calc R . . 
H5B_25 H 0.1459 0.6722 0.0862 0.237 Uiso 1 1 calc R . . 
H5C_25 H 0.1591 0.7511 0.0989 0.237 Uiso 1 1 calc R . . 
C6_25 C 0.4190(9) 0.6393(7) 0.04677(13) 0.056(3) Uani 1 1 d . . . 
O6_25 O 0.3879(6) 0.5681(5) 0.04362(9) 0.072(2) Uani 1 1 d . . . 
N1_26 N 0.4903(7) 0.6814(5) 0.03769(11) 0.065(2) Uani 1 1 d . . . 
H1_26 H 0.5053 0.7340 0.0405 0.078 Uiso 1 1 calc R . . 
C1_26 C 0.5452(10) 0.6429(6) 0.02307(13) 0.068(3) Uani 1 1 d . . . 
C2_26 C 0.6292(11) 0.7044(7) 0.01600(15) 0.085(4) Uani 1 1 d . . . 
H2A_26 H 0.6898 0.6735 0.0105 0.102 Uiso 1 1 calc R . . 
H2B_26 H 0.6583 0.7408 0.0253 0.102 Uiso 1 1 calc R . . 
C3_26 C 0.5673(15) 0.7574(10) 0.00264(19) 0.115(5) Uani 1 1 d . . . 
H3_26 H 0.5324 0.8072 0.0083 0.138 Uiso 1 1 calc R . . 
O3_26 O 0.6377(14) 0.7853(8) -0.01094(16) 0.176(7) Uani 1 1 d . . . 
C7_26 C 0.6353(18) 0.8574(14) -0.0154(3) 0.167(8) Uani 1 1 d . . . 
H7A_26 H 0.6903 0.8667 -0.0243 0.251 Uiso 1 1 calc R . . 
H7B_26 H 0.6500 0.8943 -0.0056 0.251 Uiso 1 1 calc R . . 
H7C_26 H 0.5637 0.8705 -0.0201 0.251 Uiso 1 1 calc R . . 
C4_26 C 0.484(2) 0.7000(12) -0.0042(2) 0.181(10) Uani 1 1 d . . . 
H4A_26 H 0.5069 0.6791 -0.0156 0.218 Uiso 1 1 calc R . . 
H4B_26 H 0.4154 0.7309 -0.0055 0.218 Uiso 1 1 calc R . . 
C5_26 C 0.4689(12) 0.6268(7) 0.00772(15) 0.088(4) Uani 1 1 d . . . 
H5A_26 H 0.4876 0.5730 0.0019 0.106 Uiso 1 1 calc R . . 
H5B_26 H 0.3928 0.6237 0.0116 0.106 Uiso 1 1 calc R . . 
C6_26 C 0.6026(9) 0.5613(6) 0.02910(14) 0.061(3) Uani 1 1 d . . . 
O6_26 O 0.6055(8) 0.4957(5) 0.02019(10) 0.087(2) Uani 1 1 d . . . 
N1_27 N 0.6570(7) 0.5666(5) 0.04385(11) 0.063(2) Uani 1 1 d . . . 
H1_27 H 0.6581 0.6146 0.0495 0.075 Uiso 1 1 calc R . . 
C1_27 C 0.7162(10) 0.4916(7) 0.05082(16) 0.080(3) Uani 1 1 d DU . . 
H1A_27 H 0.7597 0.4658 0.0413 0.096 Uiso 1 1 calc R . . 
C2_27 C 0.7936(12) 0.5195(8) 0.06521(16) 0.106(4) Uani 1 1 d DU . . 
H2A_27 H 0.7534 0.5558 0.0734 0.127 Uiso 1 1 calc R . . 
H2B_27 H 0.8179 0.4686 0.0716 0.127 Uiso 1 1 calc R . . 
C3_27 C 0.8926(13) 0.5675(11) 0.0590(3) 0.163(6) Uani 1 1 d DU . . 
H3_27 H 0.8717 0.6115 0.0503 0.196 Uiso 1 1 calc R . . 
C4_27 C 0.9720(18) 0.5089(15) 0.0517(3) 0.208(8) Uani 1 1 d DU . . 
H4A_27 H 0.9394 0.4781 0.0421 0.312 Uiso 1 1 calc R . . 
H4B_27 H 0.9948 0.4686 0.0605 0.312 Uiso 1 1 calc R . . 
H4C_27 H 1.0348 0.5408 0.0476 0.312 Uiso 1 1 calc R . . 
C5_27 C 0.947(2) 0.6094(15) 0.0752(3) 0.223(8) Uani 1 1 d DU . . 
H5A_27 H 0.8975 0.6518 0.0800 0.334 Uiso 1 1 calc R . . 
H5B_27 H 1.0144 0.6368 0.0718 0.334 Uiso 1 1 calc R . . 
H5C_27 H 0.9616 0.5658 0.0838 0.334 Uiso 1 1 calc R . . 
C6_27 C 0.6379(10) 0.4241(7) 0.05786(14) 0.067(3) Uani 1 1 d . . . 
O6_27 O 0.6580(7) 0.3487(5) 0.05561(10) 0.081(2) Uani 1 1 d . . . 
N1_28 N 0.5548(7) 0.4514(5) 0.06732(11) 0.062(2) Uani 1 1 d . . . 
H1_28 H 0.5436 0.5061 0.0683 0.075 Uiso 1 1 calc R . . 
C1_28 C 0.4815(9) 0.3927(6) 0.07623(13) 0.059(3) Uani 1 1 d D . . 
H1A_28 H 0.5255 0.3542 0.0836 0.071 Uiso 1 1 calc R . . 
C2_28 C 0.4085(10) 0.4461(6) 0.08773(13) 0.076(3) Uani 1 1 d D . . 
H2A_28 H 0.3692 0.4873 0.0805 0.091 Uiso 1 1 calc R . . 
H2B_28 H 0.4545 0.4787 0.0958 0.091 Uiso 1 1 calc R . . 
C3_28 C 0.3251(11) 0.3951(7) 0.09829(16) 0.095(4) Uani 1 1 d D . . 
H3_28 H 0.2878 0.3555 0.0902 0.114 Uiso 1 1 calc R . . 
C4_28 C 0.3797(15) 0.3414(9) 0.11223(17) 0.131(6) Uani 1 1 d D . . 
H4A_28 H 0.4305 0.3019 0.1069 0.196 Uiso 1 1 calc R . . 
H4B_28 H 0.3246 0.3096 0.1186 0.196 Uiso 1 1 calc R . . 
H4C_28 H 0.4189 0.3785 0.1202 0.196 Uiso 1 1 calc R . . 
C5_28 C 0.2398(16) 0.4535(11) 0.1058(3) 0.184(10) Uani 1 1 d D . . 
H5A_28 H 0.2059 0.4859 0.0965 0.276 Uiso 1 1 calc R . . 
H5B_28 H 0.2738 0.4924 0.1140 0.276 Uiso 1 1 calc R . . 
H5C_28 H 0.1848 0.4197 0.1117 0.276 Uiso 1 1 calc R . . 
C6_28 C 0.4179(8) 0.3404(6) 0.06394(12) 0.053(3) Uani 1 1 d . . . 
O6_28 O 0.4039(6) 0.2626(4) 0.06579(9) 0.0675(19) Uani 1 1 d . . . 
N1_29 N 0.3676(7) 0.3818(5) 0.05071(10) 0.060(2) Uani 1 1 d . . . 
H1_29 H 0.3754 0.4369 0.0499 0.072 Uiso 1 1 calc R . . 
C1_29 C 0.3016(9) 0.3382(6) 0.03789(14) 0.067(3) Uani 1 1 d . . . 
C2_29 C 0.3688(10) 0.2919(7) 0.02465(15) 0.078(3) Uani 1 1 d . . . 
H2A_29 H 0.3293 0.2421 0.0202 0.094 Uiso 1 1 calc R . . 
H2B_29 H 0.4380 0.2727 0.0297 0.094 Uiso 1 1 calc R . . 
C3_29 C 0.3889(11) 0.3565(9) 0.01037(17) 0.093(4) Uani 1 1 d . . . 
H3_29 H 0.4455 0.3968 0.0145 0.112 Uiso 1 1 calc R . . 
O3_29 O 0.4242(9) 0.3229(7) -0.00530(12) 0.115(3) Uani 1 1 d . . . 
C7_29 C 0.5393(14) 0.3047(11) -0.00594(19) 0.129(6) Uani 1 1 d . . . 
H7A_29 H 0.5581 0.2826 -0.0173 0.193 Uiso 1 1 calc R . . 
H7B_29 H 0.5573 0.2625 0.0028 0.193 Uiso 1 1 calc R . . 
H7C_29 H 0.5802 0.3568 -0.0038 0.193 Uiso 1 1 calc R . . 
C4_29 C 0.2833(12) 0.4045(9) 0.00925(18) 0.108(5) Uani 1 1 d . . . 
H4A_29 H 0.2958 0.4627 0.0050 0.130 Uiso 1 1 calc R . . 
H4B_29 H 0.2328 0.3756 0.0013 0.130 Uiso 1 1 calc R . . 
C5_29 C 0.2379(10) 0.4063(7) 0.02704(12) 0.071(3) Uani 1 1 d . . . 
H5A_29 H 0.1598 0.3926 0.0268 0.085 Uiso 1 1 calc R . . 
H5B_29 H 0.2471 0.4632 0.0322 0.085 Uiso 1 1 calc R . . 
C6_29 C 0.2175(10) 0.2829(9) 0.04717(18) 0.077(3) Uani 1 1 d . . . 
O6_29 O 0.1945(8) 0.2103(6) 0.04265(13) 0.109(3) Uani 1 1 d . . . 
O8_29 O 0.1672(7) 0.3249(5) 0.05979(12) 0.087(2) Uani 1 1 d . . . 
C8_29 C 0.0825(12) 0.2804(11) 0.0682(2) 0.121(5) Uani 1 1 d . . . 
H8A_29 H 0.0509 0.3164 0.0771 0.182 Uiso 1 1 calc R . . 
H8B_29 H 0.1116 0.2288 0.0735 0.182 Uiso 1 1 calc R . . 
H8C_29 H 0.0268 0.2652 0.0598 0.182 Uiso 1 1 calc R . . 
O1_31 O 0.6382(7) 0.1585(4) 0.05389(10) 0.094(2) Uani 1 1 d . . . 
H1_31 H 0.6177 0.1627 0.0431 0.141 Uiso 1 1 d . . . 
H2_31 H 0.6479 0.2105 0.0566 0.141 Uiso 1 1 d . . . 
O1_32 O 0.8835(7) 0.2126(5) 0.20133(9) 0.091(2) Uani 1 1 d . . . 
H1_32 H 0.8778 0.1993 0.2115 0.091 Uiso 1 1 d . . . 
H2_32 H 0.9205 0.1745 0.1963 0.137 Uiso 1 1 d . . . 
O1_33 O 0.9107(8) 0.1240(5) 0.23266(10) 0.112(3) Uani 1 1 d . . . 
H1_33 H 0.9733 0.1290 0.2355 0.169 Uiso 1 1 d . . . 
H2_33 H 0.8857 0.0794 0.2289 0.169 Uiso 1 1 d . . . 
O1_34 O 0.8016(17) 0.2328(9) 0.0349(2) 0.262(10) Uani 1 1 d . . . 
H1_34 H 0.7769 0.2777 0.0386 0.393 Uiso 1 1 d . . . 
H2_34 H 0.7666 0.1940 0.0387 0.393 Uiso 1 1 d . . . 
 
loop_ 
 _atom_site_aniso_label 
 _atom_site_aniso_U_11 
 _atom_site_aniso_U_22 
 _atom_site_aniso_U_33 
 _atom_site_aniso_U_23 
 _atom_site_aniso_U_13 
 _atom_site_aniso_U_12 
C1_10 0.063(7) 0.058(7) 0.083(8) 0.009(6) 0.010(6) 0.002(6) 
C2_10 0.066(8) 0.093(9) 0.130(11) -0.004(8) 0.001(8) -0.006(7) 
C3_10 0.078(8) 0.080(8) 0.114(9) -0.012(7) 0.019(7) -0.006(7) 
C4_10 0.095(10) 0.102(10) 0.156(13) 0.053(10) 0.052(10) 0.021(9) 
O1_10 0.051(4) 0.049(4) 0.076(4) -0.009(3) 0.013(3) -0.004(4) 
C5_10 0.048(7) 0.049(7) 0.066(6) 0.003(5) -0.004(5) -0.007(6) 
O5_10 0.059(4) 0.047(4) 0.094(5) 0.001(4) 0.008(4) -0.009(4) 
N1_11 0.056(6) 0.038(4) 0.066(5) -0.011(4) 0.001(4) -0.008(4) 
C1_11 0.060(7) 0.043(5) 0.060(6) 0.002(5) 0.000(5) -0.006(5) 
C2_11 0.064(7) 0.058(6) 0.073(7) -0.002(5) -0.007(6) -0.016(6) 
C3_11 0.058(7) 0.068(7) 0.094(8) -0.003(6) -0.013(6) 0.008(6) 
C4_11 0.092(9) 0.093(9) 0.132(11) 0.042(9) -0.022(9) -0.003(8) 
C5_11 0.076(9) 0.090(9) 0.147(12) 0.013(9) -0.015(9) 0.009(8) 
C6_11 0.056(6) 0.047(6) 0.063(7) 0.009(5) 0.002(5) -0.002(5) 
O6_11 0.077(5) 0.037(4) 0.087(5) -0.002(3) -0.017(4) 0.004(4) 
N1_12 0.067(5) 0.037(4) 0.066(5) 0.004(4) 0.005(4) 0.000(4) 
C1_12 0.074(7) 0.045(6) 0.064(6) -0.002(5) 0.003(6) -0.002(5) 
C2_12 0.085(8) 0.053(6) 0.070(7) -0.001(6) 0.007(6) -0.005(6) 
C3_12 0.102(10) 0.097(9) 0.072(8) -0.009(7) 0.007(7) -0.024(8) 
C4_12 0.137(14) 0.162(15) 0.111(11) -0.005(11) 0.035(11) 0.040(13) 
C5_12 0.127(13) 0.186(16) 0.087(9) 0.017(11) 0.008(9) 0.013(13) 
C6_12 0.084(9) 0.052(7) 0.055(6) -0.002(5) -0.009(6) -0.004(7) 
O6_12 0.086(5) 0.046(4) 0.068(4) -0.011(4) 0.004(4) 0.000(4) 
N1_13 0.060(6) 0.036(4) 0.077(5) -0.001(4) 0.001(5) 0.002(4) 
C1_13 0.061(7) 0.043(5) 0.069(6) -0.004(5) -0.009(5) -0.010(6) 
C2_13 0.074(6) 0.067(7) 0.111(7) 0.000(6) -0.003(6) 0.012(7) 
C3_13 0.099(6) 0.077(9) 0.165(10) 0.006(7) -0.051(7) 0.003(7) 
C4_13 0.131(11) 0.139(13) 0.124(7) 0.020(9) -0.059(8) 0.009(11) 
C5_13 0.106(9) 0.053(6) 0.083(8) 0.003(6) -0.032(7) -0.018(7) 
O3_13 0.086(5) 0.201(13) 0.245(13) 0.017(11) -0.039(7) 0.024(8) 
C7_13 0.103(9) 0.33(4) 0.30(3) 0.15(3) 0.029(17) 0.074(18) 
C6_13 0.056(6) 0.055(7) 0.060(7) -0.005(5) 0.001(5) -0.011(5) 
O6_13 0.086(5) 0.049(4) 0.071(4) 0.001(4) -0.012(4) -0.015(4) 
N1_14 0.059(5) 0.039(4) 0.067(5) 0.005(4) 0.000(4) -0.004(4) 
C1_14 0.056(6) 0.046(5) 0.067(6) 0.003(5) 0.003(5) -0.005(5) 
C2_14 0.097(8) 0.062(7) 0.069(6) -0.002(5) -0.004(6) 0.005(6) 
C3_14 0.143(12) 0.076(8) 0.085(8) -0.002(6) 0.014(7) 0.020(7) 
C4_14 0.205(19) 0.156(14) 0.111(11) -0.059(10) 0.010(12) 0.028(13) 
C5_14 0.202(19) 0.142(14) 0.21(2) -0.036(14) 0.126(16) -0.023(12) 
C6_14 0.073(8) 0.042(7) 0.065(6) -0.001(5) -0.007(6) -0.004(6) 
O6_14 0.088(5) 0.046(4) 0.076(4) 0.000(3) -0.003(4) -0.004(4) 
N1_15 0.059(5) 0.039(5) 0.086(6) 0.002(4) 0.005(5) -0.009(5) 
C1_15 0.074(6) 0.050(6) 0.062(6) -0.001(5) 0.005(6) -0.002(5) 
C2_15 0.088(7) 0.087(9) 0.134(11) -0.010(8) 0.018(8) -0.027(6) 
C3_15 0.086(7) 0.141(13) 0.198(15) -0.022(13) 0.048(11) -0.024(8) 
C4_15 0.132(17) 0.37(4) 0.216(19) -0.08(2) 0.047(16) 0.03(2) 
C5_15 0.109(11) 0.23(3) 0.36(3) -0.05(2) -0.005(18) -0.049(15) 
C6_15 0.048(6) 0.049(7) 0.081(7) -0.005(6) 0.016(6) 0.002(5) 
O6_15 0.070(5) 0.043(4) 0.083(5) 0.003(3) 0.004(4) -0.002(4) 
N1_16 0.069(6) 0.037(4) 0.079(6) 0.008(5) 0.016(5) 0.003(4) 
C1_16 0.073(7) 0.057(6) 0.052(6) 0.006(5) 0.003(6) 0.000(6) 
C2_16 0.097(8) 0.055(6) 0.057(6) 0.002(5) 0.012(6) 0.000(6) 
C3_16 0.118(11) 0.078(8) 0.058(7) 0.000(6) -0.001(8) -0.021(8) 
O3_16 0.167(10) 0.130(8) 0.074(6) 0.015(6) -0.010(6) -0.017(8) 
C7_16 0.192(18) 0.155(14) 0.083(9) 0.054(10) 0.012(11) -0.050(14) 
C4_16 0.190(19) 0.164(16) 0.142(14) 0.098(13) 0.099(14) 0.043(16) 
C5_16 0.103(9) 0.065(7) 0.067(7) -0.003(6) 0.035(7) -0.021(7) 
C6_16 0.069(7) 0.049(7) 0.065(7) 0.009(6) -0.004(6) -0.002(6) 
O6_16 0.110(6) 0.055(5) 0.069(4) -0.009(4) 0.019(4) -0.008(4) 
N1_17 0.066(5) 0.047(5) 0.049(4) -0.005(4) 0.006(4) 0.001(4) 
C1_17 0.048(5) 0.038(5) 0.050(5) 0.003(4) 0.001(5) -0.005(5) 
C2_17 0.058(6) 0.057(6) 0.068(6) 0.019(5) -0.003(6) -0.001(5) 
C3_17 0.054(6) 0.071(7) 0.085(7) 0.002(6) 0.011(6) -0.005(6) 
C4_17 0.107(11) 0.117(11) 0.114(10) 0.015(9) 0.046(9) 0.014(10) 
C5_17 0.087(9) 0.115(11) 0.120(10) -0.007(9) 0.007(8) -0.043(9) 
C6_17 0.043(6) 0.041(6) 0.061(6) 0.000(5) 0.009(5) -0.002(5) 
O6_17 0.069(5) 0.044(4) 0.069(4) -0.005(3) -0.007(4) -0.005(4) 
N1_18 0.048(5) 0.043(4) 0.067(5) 0.010(4) 0.006(5) -0.007(4) 
C1_18 0.054(6) 0.041(5) 0.062(6) 0.023(5) -0.007(5) -0.006(5) 
C2_18 0.066(7) 0.052(6) 0.082(7) -0.002(5) -0.011(6) 0.003(6) 
C3_18 0.097(10) 0.110(10) 0.076(8) -0.031(7) -0.012(8) 0.009(9) 
C4_18 0.096(10) 0.165(14) 0.104(10) -0.023(10) -0.011(9) 0.011(11) 
C5_18 0.111(12) 0.160(14) 0.111(11) 0.025(11) -0.007(10) -0.001(12) 
C6_18 0.046(6) 0.044(6) 0.063(6) 0.001(5) -0.004(5) -0.010(5) 
O6_18 0.061(4) 0.042(4) 0.090(5) 0.011(4) -0.006(4) -0.007(4) 
N1_19 0.058(5) 0.046(5) 0.081(6) 0.006(4) 0.000(5) 0.000(4) 
C1_19 0.055(7) 0.043(6) 0.111(9) -0.009(6) 0.011(7) 0.004(5) 
C2_19 0.082(8) 0.060(6) 0.103(5) 0.001(5) 0.019(6) -0.004(6) 
C3_19 0.093(9) 0.073(6) 0.106(6) -0.009(5) -0.007(7) 0.006(6) 
O3_19 0.202(11) 0.107(6) 0.108(5) -0.032(6) 0.020(7) 0.015(7) 
C4_19 0.092(9) 0.077(4) 0.096(8) 0.010(5) 0.031(8) 0.003(6) 
C5_19 0.061(7) 0.066(7) 0.100(8) 0.000(6) 0.022(7) -0.007(6) 
C7_19 0.37(4) 0.23(2) 0.100(6) -0.032(13) -0.007(14) -0.02(3) 
C6_19 0.066(8) 0.059(8) 0.119(11) 0.019(8) 0.001(8) -0.006(7) 
O6_19 0.081(6) 0.080(6) 0.170(9) 0.033(6) -0.006(6) 0.015(6) 
O8_19 0.064(5) 0.083(6) 0.127(7) 0.020(6) -0.023(5) -0.016(5) 
C8_19 0.119(13) 0.140(14) 0.165(14) 0.049(12) -0.065(12) -0.027(11) 
C1_20 0.078(8) 0.066(7) 0.061(6) -0.004(5) -0.019(6) 0.001(6) 
C2_20 0.073(8) 0.122(11) 0.116(10) -0.031(9) 0.012(8) -0.001(8) 
C3_20 0.085(9) 0.078(9) 0.163(13) -0.003(9) -0.033(9) -0.014(8) 
C4_20 0.129(12) 0.180(15) 0.067(8) 0.009(9) -0.019(8) -0.021(12) 
O1_20 0.052(4) 0.053(4) 0.079(4) 0.009(3) -0.009(4) 0.006(4) 
C5_20 0.060(8) 0.074(9) 0.065(7) 0.016(6) 0.006(6) -0.005(7) 
O5_20 0.068(5) 0.065(5) 0.146(8) 0.041(5) -0.001(5) 0.007(4) 
N1_21 0.057(6) 0.046(5) 0.054(5) 0.009(4) 0.003(4) 0.005(4) 
C1_21 0.055(6) 0.048(6) 0.064(6) 0.009(5) 0.008(5) 0.003(5) 
C2_21 0.061(7) 0.063(7) 0.084(7) 0.005(6) 0.004(6) 0.014(6) 
C3_21 0.064(7) 0.068(7) 0.081(7) 0.002(6) 0.012(6) 0.000(6) 
C4_21 0.062(8) 0.118(10) 0.102(9) -0.014(8) 0.013(7) -0.001(8) 
C5_21 0.084(9) 0.094(9) 0.119(10) 0.030(8) 0.018(8) -0.008(8) 
C6_21 0.049(6) 0.051(7) 0.066(7) 0.007(6) 0.007(5) 0.002(5) 
O6_21 0.071(5) 0.042(4) 0.067(4) 0.011(3) 0.019(4) 0.006(3) 
N1_22 0.073(6) 0.040(4) 0.059(5) -0.006(4) -0.004(4) 0.001(4) 
C1_22 0.075(7) 0.053(6) 0.044(5) 0.006(5) 0.004(5) 0.005(6) 
C2_22 0.081(8) 0.062(6) 0.057(6) 0.000(5) -0.003(6) 0.001(6) 
C3_22 0.097(9) 0.063(7) 0.087(8) -0.004(7) -0.015(7) 0.006(7) 
C4_22 0.127(13) 0.133(13) 0.131(12) -0.013(10) -0.019(11) -0.016(12) 
C5_22 0.223(19) 0.090(9) 0.061(7) -0.009(7) 0.016(10) -0.004(12) 
C6_22 0.064(7) 0.048(6) 0.053(6) 0.000(5) 0.000(5) -0.005(6) 
O6_22 0.083(5) 0.048(4) 0.058(4) -0.006(3) -0.007(4) 0.002(4) 
N1_23 0.076(6) 0.033(4) 0.051(4) 0.003(4) 0.003(5) 0.002(5) 
C1_23 0.059(7) 0.050(6) 0.053(6) -0.013(5) -0.003(5) -0.006(6) 
C2_23 0.063(6) 0.052(6) 0.058(6) -0.003(5) 0.002(5) 0.008(5) 
C3_23 0.098(10) 0.056(6) 0.065(7) 0.005(5) -0.004(7) -0.012(7) 
O3_23 0.071(6) 0.118(7) 0.105(6) 0.030(5) 0.014(5) -0.012(5) 
C7_23 0.129(14) 0.187(18) 0.170(16) 0.052(14) 0.044(13) -0.067(14) 
C4_23 0.097(9) 0.076(8) 0.058(7) -0.001(6) 0.020(6) -0.012(7) 
C5_23 0.081(8) 0.058(6) 0.059(6) -0.006(5) 0.012(6) 0.001(6) 
C6_23 0.057(6) 0.054(7) 0.059(7) 0.004(5) -0.002(6) 0.006(5) 
O6_23 0.095(5) 0.046(4) 0.067(4) -0.003(3) 0.022(4) 0.006(4) 
N1_24 0.062(5) 0.044(4) 0.046(4) 0.004(4) 0.003(4) 0.004(4) 
C1_24 0.057(6) 0.054(6) 0.052(6) 0.002(5) -0.001(5) 0.007(5) 
C2_24 0.079(7) 0.062(6) 0.049(6) 0.015(5) -0.002(5) -0.006(6) 
C3_24 0.113(10) 0.100(9) 0.072(7) 0.016(7) 0.019(8) 0.010(9) 
C4_24 0.204(19) 0.171(16) 0.100(11) 0.016(11) 0.066(13) 0.019(16) 
C5_24 0.22(2) 0.154(16) 0.148(15) 0.067(13) 0.006(16) 0.041(17) 
C6_24 0.071(7) 0.042(6) 0.059(6) 0.004(5) 0.005(6) 0.000(6) 
O6_24 0.083(5) 0.049(5) 0.077(5) 0.006(3) 0.002(4) 0.002(4) 
N1_25 0.055(5) 0.053(5) 0.072(5) 0.003(4) -0.006(5) 0.000(5) 
C1_25 0.062(7) 0.042(5) 0.084(7) 0.003(5) -0.008(6) -0.005(6) 
C2_25 0.077(8) 0.070(8) 0.114(9) -0.009(7) -0.011(8) -0.007(7) 
C3_25 0.081(10) 0.081(10) 0.196(17) -0.011(11) 0.003(11) 0.022(8) 
C4_25 0.116(14) 0.144(16) 0.29(3) -0.004(17) -0.020(16) 0.049(13) 
C5_25 0.146(16) 0.152(16) 0.176(17) -0.047(15) 0.015(15) -0.020(14) 
C6_25 0.060(7) 0.039(6) 0.069(7) 0.004(6) -0.014(6) 0.002(6) 
O6_25 0.085(5) 0.044(4) 0.088(5) 0.003(4) -0.016(4) -0.007(4) 
N1_26 0.078(6) 0.044(5) 0.073(6) 0.002(4) -0.003(5) -0.011(5) 
C1_26 0.096(8) 0.045(6) 0.063(7) 0.001(5) 0.006(7) -0.016(6) 
C2_26 0.128(11) 0.049(6) 0.077(7) -0.003(6) 0.019(8) -0.004(7) 
C3_26 0.166(15) 0.076(9) 0.103(11) 0.010(9) 0.057(11) -0.009(11) 
O3_26 0.284(18) 0.097(8) 0.147(9) 0.048(7) 0.117(11) 0.055(10) 
C7_26 0.18(2) 0.156(18) 0.165(17) 0.033(16) 0.053(16) 0.008(17) 
C4_26 0.26(3) 0.141(15) 0.144(15) 0.074(13) -0.062(17) -0.065(18) 
C5_26 0.124(11) 0.052(6) 0.089(8) 0.001(6) -0.015(8) 0.002(7) 
C6_26 0.080(7) 0.041(6) 0.062(7) -0.008(6) 0.004(6) -0.019(6) 
O6_26 0.121(7) 0.058(5) 0.083(5) -0.004(4) -0.004(5) 0.003(5) 
N1_27 0.070(6) 0.055(5) 0.063(5) -0.013(4) 0.006(5) -0.005(5) 
C1_27 0.073(7) 0.058(7) 0.108(8) -0.016(6) -0.003(6) 0.016(6) 
C2_27 0.138(9) 0.086(8) 0.095(8) 0.010(7) -0.034(6) 0.009(7) 
C3_27 0.121(9) 0.133(14) 0.237(17) 0.003(11) -0.061(10) -0.030(6) 
C4_27 0.174(10) 0.237(12) 0.214(11) 0.004(9) 0.033(9) -0.017(9) 
C5_27 0.202(11) 0.231(12) 0.234(11) -0.029(9) -0.045(9) -0.075(9) 
C6_27 0.075(8) 0.050(7) 0.075(7) 0.006(6) -0.003(7) -0.001(6) 
O6_27 0.091(6) 0.044(5) 0.108(6) -0.004(4) 0.008(5) 0.008(4) 
N1_28 0.061(5) 0.039(5) 0.088(6) -0.003(4) 0.004(5) 0.005(4) 
C1_28 0.064(7) 0.042(5) 0.071(6) 0.014(5) -0.005(6) 0.008(5) 
C2_28 0.105(9) 0.055(6) 0.066(6) 0.003(5) 0.010(7) -0.003(7) 
C3_28 0.118(11) 0.067(7) 0.099(9) 0.000(7) 0.035(9) 0.004(8) 
C4_28 0.181(17) 0.105(11) 0.106(10) 0.000(9) 0.022(11) -0.003(12) 
C5_28 0.20(2) 0.131(14) 0.22(2) 0.056(14) 0.121(18) 0.054(15) 
C6_28 0.071(7) 0.043(6) 0.045(6) 0.019(5) -0.005(5) 0.002(5) 
O6_28 0.080(5) 0.046(4) 0.076(5) 0.016(3) -0.012(4) -0.007(4) 
N1_29 0.071(6) 0.040(4) 0.068(5) 0.000(4) -0.005(5) -0.011(4) 
C1_29 0.078(7) 0.045(6) 0.077(7) 0.014(6) -0.013(7) -0.006(6) 
C2_29 0.088(8) 0.056(6) 0.091(8) 0.007(6) 0.001(7) 0.003(6) 
C3_29 0.088(10) 0.105(10) 0.085(9) 0.004(8) -0.004(8) 0.000(9) 
O3_29 0.113(8) 0.141(8) 0.091(6) -0.005(6) 0.025(6) 0.014(7) 
C7_29 0.139(15) 0.144(13) 0.102(11) -0.003(10) 0.043(10) 0.016(12) 
C4_29 0.116(12) 0.112(11) 0.097(10) 0.035(8) 0.002(9) 0.026(10) 
C5_29 0.085(8) 0.069(7) 0.059(6) 0.009(5) -0.027(6) -0.001(6) 
C6_29 0.058(8) 0.077(9) 0.094(9) 0.028(8) -0.020(7) -0.016(7) 
O6_29 0.105(7) 0.079(6) 0.143(8) 0.011(6) -0.023(6) -0.036(6) 
O8_29 0.070(5) 0.087(6) 0.103(6) 0.029(5) 0.018(5) -0.012(5) 
C8_29 0.086(10) 0.149(13) 0.128(11) 0.028(11) 0.020(9) -0.013(10) 
O1_31 0.119(6) 0.057(4) 0.107(5) -0.014(4) 0.005(5) -0.004(5) 
O1_32 0.114(6) 0.079(5) 0.081(5) -0.002(4) 0.000(5) 0.030(5) 
O1_33 0.144(8) 0.105(6) 0.089(5) -0.003(5) -0.004(6) 0.002(6) 
O1_34 0.33(2) 0.126(10) 0.33(2) 0.006(12) 0.187(19) 0.010(13) 
 
_geom_special_details 
; 
 All esds (except the esd in the dihedral angle between two l.s. planes) 
 are estimated using the full covariance matrix.  The cell esds are taken 
 into account individually in the estimation of esds in distances, angles 
 and torsion angles; correlations between esds in cell parameters are only 
 used when they are defined by crystal symmetry.  An approximate (isotropic) 
 treatment of cell esds is used for estimating esds involving l.s. planes. 
; 
 
loop_ 
 _geom_bond_atom_site_label_1 
 _geom_bond_atom_site_label_2 
 _geom_bond_distance 
 _geom_bond_site_symmetry_2 
 _geom_bond_publ_flag 
C1_10 O1_10 1.480(13) . ? 
C1_10 C3_10 1.489(15) . ? 
C1_10 C2_10 1.493(16) . ? 
C1_10 C4_10 1.509(15) . ? 
C2_10 H2A_10 0.9700 . ? 
C2_10 H2B_10 0.9700 . ? 
C2_10 H2C_10 0.9700 . ? 
C3_10 H3A_10 0.9700 . ? 
C3_10 H3B_10 0.9700 . ? 
C3_10 H3C_10 0.9700 . ? 
C4_10 H4A_10 0.9700 . ? 
C4_10 H4B_10 0.9700 . ? 
C4_10 H4C_10 0.9700 . ? 
O1_10 C5_10 1.305(11) . ? 
C5_10 O5_10 1.225(11) . ? 
C5_10 N1_11 1.342(12) . ? 
N1_11 C1_11 1.473(12) . ? 
N1_11 H1_11 0.8700 . ? 
C1_11 C6_11 1.502(13) . ? 
C1_11 C2_11 1.524(13) . ? 
C1_11 H1A_11 0.9900 . ? 
C2_11 C3_11 1.504(12) . ? 
C2_11 H2A_11 0.9800 . ? 
C2_11 H2B_11 0.9800 . ? 
C3_11 C4_11 1.525(13) . ? 
C3_11 C5_11 1.535(13) . ? 
C3_11 H3_11 0.9900 . ? 
C4_11 H4A_11 0.9700 . ? 
C4_11 H4B_11 0.9700 . ? 
C4_11 H4C_11 0.9700 . ? 
C5_11 H5A_11 0.9700 . ? 
C5_11 H5B_11 0.9700 . ? 
C5_11 H5C_11 0.9700 . ? 
C6_11 O6_11 1.239(11) . ? 
C6_11 N1_12 1.333(11) . ? 
N1_12 C1_12 1.452(12) . ? 
N1_12 H1_12 0.8700 . ? 
C1_12 C2_12 1.492(13) . ? 
C1_12 C6_12 1.538(15) . ? 
C1_12 H1A_12 0.9900 . ? 
C2_12 C3_12 1.508(12) . ? 
C2_12 H2A_12 0.9800 . ? 
C2_12 H2B_12 0.9800 . ? 
C3_12 C4_12 1.499(15) . ? 
C3_12 C5_12 1.516(14) . ? 
C3_12 H3_12 0.9900 . ? 
C4_12 H4A_12 0.9700 . ? 
C4_12 H4B_12 0.9700 . ? 
C4_12 H4C_12 0.9700 . ? 
C5_12 H5A_12 0.9700 . ? 
C5_12 H5B_12 0.9700 . ? 
C5_12 H5C_12 0.9700 . ? 
C6_12 O6_12 1.210(12) . ? 
C6_12 N1_13 1.340(14) . ? 
N1_13 C1_13 1.459(12) . ? 
N1_13 H1_13 0.8700 . ? 
C1_13 C6_13 1.471(14) . ? 
C1_13 C2_13 1.510(15) . ? 
C1_13 C5_13 1.556(14) . ? 
C2_13 C3_13 1.465(17) . ? 
C2_13 H2A_13 0.9800 . ? 
C2_13 H2B_13 0.9800 . ? 
C3_13 C4_13 1.46(2) . ? 
C3_13 O3_13 1.50(2) . ? 
C3_13 H3_13 0.9900 . ? 
C4_13 C5_13 1.543(18) . ? 
C4_13 H4A_13 0.9800 . ? 
C4_13 H4B_13 0.9800 . ? 
C5_13 H5A_13 0.9800 . ? 
C5_13 H5B_13 0.9800 . ? 
O3_13 C7_13 1.33(2) . ? 
C7_13 H7A_13 0.9700 . ? 
C7_13 H7B_13 0.9700 . ? 
C7_13 H7C_13 0.9700 . ? 
C6_13 O6_13 1.226(11) . ? 
C6_13 N1_14 1.344(12) . ? 
N1_14 C1_14 1.474(12) . ? 
N1_14 H1_14 0.8700 . ? 
C1_14 C2_14 1.488(13) . ? 
C1_14 C6_14 1.507(14) . ? 
C1_14 H1A_14 0.9900 . ? 
C2_14 C3_14 1.511(13) . ? 
C2_14 H2A_14 0.9800 . ? 
C2_14 H2B_14 0.9800 . ? 
C3_14 C5_14 1.494(15) . ? 
C3_14 C4_14 1.536(14) . ? 
C3_14 H3_14 0.9900 . ? 
C4_14 H4A_14 0.9700 . ? 
C4_14 H4B_14 0.9700 . ? 
C4_14 H4C_14 0.9700 . ? 
C5_14 H5A_14 0.9700 . ? 
C5_14 H5B_14 0.9700 . ? 
C5_14 H5C_14 0.9700 . ? 
C6_14 O6_14 1.270(11) . ? 
C6_14 N1_15 1.305(13) . ? 
N1_15 C1_15 1.432(12) . ? 
N1_15 H1_15 0.8700 . ? 
C1_15 C2_15 1.476(15) . ? 
C1_15 C6_15 1.519(14) . ? 
C1_15 H1A_15 0.9900 . ? 
C2_15 C3_15 1.564(15) . ? 
C2_15 H2A_15 0.9800 . ? 
C2_15 H2B_15 0.9800 . ? 
C3_15 C4_15 1.465(16) . ? 
C3_15 C5_15 1.513(16) . ? 
C3_15 H3_15 0.9900 . ? 
C4_15 H4A_15 0.9700 . ? 
C4_15 H4B_15 0.9700 . ? 
C4_15 H4C_15 0.9700 . ? 
C5_15 H5A_15 0.9700 . ? 
C5_15 H5B_15 0.9700 . ? 
C5_15 H5C_15 0.9700 . ? 
C6_15 O6_15 1.238(11) . ? 
C6_15 N1_16 1.329(13) . ? 
N1_16 C1_16 1.487(13) . ? 
N1_16 H1_16 0.8700 . ? 
C1_16 C2_16 1.488(14) . ? 
C1_16 C6_16 1.534(14) . ? 
C1_16 C5_16 1.540(14) . ? 
C2_16 C3_16 1.483(15) . ? 
C2_16 H2A_16 0.9800 . ? 
C2_16 H2B_16 0.9800 . ? 
C3_16 C4_16 1.42(2) . ? 
C3_16 O3_16 1.435(14) . ? 
C3_16 H3_16 0.9900 . ? 
O3_16 C7_16 1.417(15) . ? 
C7_16 H7A_16 0.9700 . ? 
C7_16 H7B_16 0.9700 . ? 
C7_16 H7C_16 0.9700 . ? 
C4_16 C5_16 1.535(17) . ? 
C4_16 H4A_16 0.9800 . ? 
C4_16 H4B_16 0.9800 . ? 
C5_16 H5A_16 0.9800 . ? 
C5_16 H5B_16 0.9800 . ? 
C6_16 O6_16 1.220(12) . ? 
C6_16 N1_17 1.342(13) . ? 
N1_17 C1_17 1.453(11) . ? 
N1_17 H1_17 0.8700 . ? 
C1_17 C6_17 1.499(13) . ? 
C1_17 C2_17 1.508(13) . ? 
C1_17 H1A_17 0.9900 . ? 
C2_17 C3_17 1.514(11) . ? 
C2_17 H2A_17 0.9800 . ? 
C2_17 H2B_17 0.9800 . ? 
C3_17 C4_17 1.531(13) . ? 
C3_17 C5_17 1.536(13) . ? 
C3_17 H3_17 0.9900 . ? 
C4_17 H4A_17 0.9700 . ? 
C4_17 H4B_17 0.9700 . ? 
C4_17 H4C_17 0.9700 . ? 
C5_17 H5A_17 0.9700 . ? 
C5_17 H5B_17 0.9700 . ? 
C5_17 H5C_17 0.9700 . ? 
C6_17 O6_17 1.227(10) . ? 
C6_17 N1_18 1.331(12) . ? 
N1_18 C1_18 1.453(11) . ? 
N1_18 H1_18 0.8700 . ? 
C1_18 C6_18 1.502(14) . ? 
C1_18 C2_18 1.536(13) . ? 
C1_18 H1A_18 0.9900 . ? 
C2_18 C3_18 1.541(13) . ? 
C2_18 H2A_18 0.9800 . ? 
C2_18 H2B_18 0.9800 . ? 
C3_18 C5_18 1.466(14) . ? 
C3_18 C4_18 1.507(13) . ? 
C3_18 H3_18 0.9900 . ? 
C4_18 H4A_18 0.9700 . ? 
C4_18 H4B_18 0.9700 . ? 
C4_18 H4C_18 0.9700 . ? 
C5_18 H5A_18 0.9700 . ? 
C5_18 H5B_18 0.9700 . ? 
C5_18 H5C_18 0.9700 . ? 
C6_18 O6_18 1.226(11) . ? 
C6_18 N1_19 1.344(12) . ? 
N1_19 C1_19 1.465(13) . ? 
N1_19 H1_19 0.8700 . ? 
C1_19 C6_19 1.532(17) . ? 
C1_19 C2_19 1.555(15) . ? 
C1_19 C5_19 1.576(15) . ? 
C2_19 C3_19 1.512(16) . ? 
C2_19 H2A_19 0.9800 . ? 
C2_19 H2B_19 0.9800 . ? 
C3_19 O3_19 1.408(15) . ? 
C3_19 C4_19 1.530(16) . ? 
C3_19 H3_19 0.9900 . ? 
O3_19 C7_19 1.40(2) . ? 
C4_19 C5_19 1.530(16) . ? 
C4_19 H4A_19 0.9800 . ? 
C4_19 H4B_19 0.9800 . ? 
C5_19 H5A_19 0.9800 . ? 
C5_19 H5B_19 0.9800 . ? 
C7_19 H7A_19 0.9700 . ? 
C7_19 H7B_19 0.9700 . ? 
C7_19 H7C_19 0.9700 . ? 
C6_19 O6_19 1.193(14) . ? 
C6_19 O8_19 1.318(15) . ? 
O8_19 C8_19 1.499(15) . ? 
C8_19 H8A_19 0.9700 . ? 
C8_19 H8B_19 0.9700 . ? 
C8_19 H8C_19 0.9700 . ? 
C1_20 O1_20 1.464(13) . ? 
C1_20 C2_20 1.512(16) . ? 
C1_20 C3_20 1.516(15) . ? 
C1_20 C4_20 1.526(15) . ? 
C2_20 H2A_20 0.9700 . ? 
C2_20 H2B_20 0.9700 . ? 
C2_20 H2C_20 0.9700 . ? 
C3_20 H3A_20 0.9700 . ? 
C3_20 H3B_20 0.9700 . ? 
C3_20 H3C_20 0.9700 . ? 
C4_20 H4A_20 0.9700 . ? 
C4_20 H4B_20 0.9700 . ? 
C4_20 H4C_20 0.9700 . ? 
O1_20 C5_20 1.341(13) . ? 
C5_20 O5_20 1.200(13) . ? 
C5_20 N1_21 1.355(13) . ? 
N1_21 C1_21 1.441(12) . ? 
N1_21 H1_21 0.8700 . ? 
C1_21 C6_21 1.514(14) . ? 
C1_21 C2_21 1.524(14) . ? 
C1_21 H1A_21 0.9900 . ? 
C2_21 C3_21 1.514(12) . ? 
C2_21 H2A_21 0.9800 . ? 
C2_21 H2B_21 0.9800 . ? 
C3_21 C5_21 1.502(12) . ? 
C3_21 C4_21 1.530(13) . ? 
C3_21 H3_21 0.9900 . ? 
C4_21 H4A_21 0.9700 . ? 
C4_21 H4B_21 0.9700 . ? 
C4_21 H4C_21 0.9700 . ? 
C5_21 H5A_21 0.9700 . ? 
C5_21 H5B_21 0.9700 . ? 
C5_21 H5C_21 0.9700 . ? 
C6_21 O6_21 1.225(11) . ? 
C6_21 N1_22 1.324(12) . ? 
N1_22 C1_22 1.450(11) . ? 
N1_22 H1_22 0.8700 . ? 
C1_22 C2_22 1.498(13) . ? 
C1_22 C6_22 1.513(14) . ? 
C1_22 H1A_22 0.9900 . ? 
C2_22 C3_22 1.523(12) . ? 
C2_22 H2A_22 0.9800 . ? 
C2_22 H2B_22 0.9800 . ? 
C3_22 C5_22 1.510(13) . ? 
C3_22 C4_22 1.521(14) . ? 
C3_22 H3_22 0.9900 . ? 
C4_22 H4A_22 0.9700 . ? 
C4_22 H4B_22 0.9700 . ? 
C4_22 H4C_22 0.9700 . ? 
C5_22 H5A_22 0.9700 . ? 
C5_22 H5B_22 0.9700 . ? 
C5_22 H5C_22 0.9700 . ? 
C6_22 O6_22 1.210(11) . ? 
C6_22 N1_23 1.333(12) . ? 
N1_23 C1_23 1.461(12) . ? 
N1_23 H1_23 0.8700 . ? 
C1_23 C5_23 1.519(13) . ? 
C1_23 C2_23 1.537(13) . ? 
C1_23 C6_23 1.539(14) . ? 
C2_23 C3_23 1.516(14) . ? 
C2_23 H2A_23 0.9800 . ? 
C2_23 H2B_23 0.9800 . ? 
C3_23 O3_23 1.390(14) . ? 
C3_23 C4_23 1.517(15) . ? 
C3_23 H3_23 0.9900 . ? 
O3_23 C7_23 1.467(16) . ? 
C7_23 H7A_23 0.9700 . ? 
C7_23 H7B_23 0.9700 . ? 
C7_23 H7C_23 0.9700 . ? 
C4_23 C5_23 1.509(15) . ? 
C4_23 H4A_23 0.9800 . ? 
C4_23 H4B_23 0.9800 . ? 
C5_23 H5A_23 0.9800 . ? 
C5_23 H5B_23 0.9800 . ? 
C6_23 O6_23 1.230(11) . ? 
C6_23 N1_24 1.351(12) . ? 
N1_24 C1_24 1.450(11) . ? 
N1_24 H1_24 0.8700 . ? 
C1_24 C6_24 1.517(13) . ? 
C1_24 C2_24 1.526(13) . ? 
C1_24 H1A_24 0.9900 . ? 
C2_24 C3_24 1.539(12) . ? 
C2_24 H2A_24 0.9800 . ? 
C2_24 H2B_24 0.9800 . ? 
C3_24 C5_24 1.505(15) . ? 
C3_24 C4_24 1.519(14) . ? 
C3_24 H3_24 0.9900 . ? 
C4_24 H4A_24 0.9700 . ? 
C4_24 H4B_24 0.9700 . ? 
C4_24 H4C_24 0.9700 . ? 
C5_24 H5A_24 0.9700 . ? 
C5_24 H5B_24 0.9700 . ? 
C5_24 H5C_24 0.9700 . ? 
C6_24 O6_24 1.234(11) . ? 
C6_24 N1_25 1.325(12) . ? 
N1_25 C1_25 1.436(12) . ? 
N1_25 H1_25 0.8700 . ? 
C1_25 C2_25 1.478(15) . ? 
C1_25 C6_25 1.563(14) . ? 
C1_25 H1A_25 0.9900 . ? 
C2_25 C3_25 1.524(14) . ? 
C2_25 H2A_25 0.9800 . ? 
C2_25 H2B_25 0.9800 . ? 
C3_25 C4_25 1.514(15) . ? 
C3_25 C5_25 1.516(15) . ? 
C3_25 H3_25 0.9900 . ? 
C4_25 H4A_25 0.9700 . ? 
C4_25 H4B_25 0.9700 . ? 
C4_25 H4C_25 0.9700 . ? 
C5_25 H5A_25 0.9700 . ? 
C5_25 H5B_25 0.9700 . ? 
C5_25 H5C_25 0.9700 . ? 
C6_25 O6_25 1.202(11) . ? 
C6_25 N1_26 1.298(12) . ? 
N1_26 C1_26 1.444(13) . ? 
N1_26 H1_26 0.8700 . ? 
C1_26 C2_26 1.510(15) . ? 
C1_26 C5_26 1.528(16) . ? 
C1_26 C6_26 1.530(15) . ? 
C2_26 C3_26 1.523(19) . ? 
C2_26 H2A_26 0.9800 . ? 
C2_26 H2B_26 0.9800 . ? 
C3_26 O3_26 1.424(17) . ? 
C3_26 C4_26 1.45(2) . ? 
C3_26 H3_26 0.9900 . ? 
O3_26 C7_26 1.181(19) . ? 
C7_26 H7A_26 0.9700 . ? 
C7_26 H7B_26 0.9700 . ? 
C7_26 H7C_26 0.9700 . ? 
C4_26 C5_26 1.479(18) . ? 
C4_26 H4A_26 0.9800 . ? 
C4_26 H4B_26 0.9800 . ? 
C5_26 H5A_26 0.9800 . ? 
C5_26 H5B_26 0.9800 . ? 
C6_26 O6_26 1.234(11) . ? 
C6_26 N1_27 1.320(13) . ? 
N1_27 C1_27 1.479(13) . ? 
N1_27 H1_27 0.8700 . ? 
C1_27 C2_27 1.523(16) . ? 
C1_27 C6_27 1.526(15) . ? 
C1_27 H1A_27 0.9900 . ? 
C2_27 C3_27 1.505(16) . ? 
C2_27 H2A_27 0.9800 . ? 
C2_27 H2B_27 0.9800 . ? 
C3_27 C4_27 1.449(17) . ? 
C3_27 C5_27 1.558(16) . ? 
C3_27 H3_27 0.9900 . ? 
C4_27 H4A_27 0.9700 . ? 
C4_27 H4B_27 0.9700 . ? 
C4_27 H4C_27 0.9700 . ? 
C5_27 H5A_27 0.9700 . ? 
C5_27 H5B_27 0.9700 . ? 
C5_27 H5C_27 0.9700 . ? 
C6_27 O6_27 1.217(12) . ? 
C6_27 N1_28 1.323(13) . ? 
N1_28 C1_28 1.455(12) . ? 
N1_28 H1_28 0.8700 . ? 
C1_28 C6_28 1.474(14) . ? 
C1_28 C2_28 1.511(14) . ? 
C1_28 H1A_28 0.9900 . ? 
C2_28 C3_28 1.531(13) . ? 
C2_28 H2A_28 0.9800 . ? 
C2_28 H2B_28 0.9800 . ? 
C3_28 C5_28 1.502(14) . ? 
C3_28 C4_28 1.519(14) . ? 
C3_28 H3_28 0.9900 . ? 
C4_28 H4A_28 0.9700 . ? 
C4_28 H4B_28 0.9700 . ? 
C4_28 H4C_28 0.9700 . ? 
C5_28 H5A_28 0.9700 . ? 
C5_28 H5B_28 0.9700 . ? 
C5_28 H5C_28 0.9700 . ? 
C6_28 O6_28 1.237(11) . ? 
C6_28 N1_29 1.355(11) . ? 
N1_29 C1_29 1.447(12) . ? 
N1_29 H1_29 0.8700 . ? 
C1_29 C2_29 1.498(15) . ? 
C1_29 C6_29 1.523(15) . ? 
C1_29 C5_29 1.563(14) . ? 
C2_29 C3_29 1.513(16) . ? 
C2_29 H2A_29 0.9800 . ? 
C2_29 H2B_29 0.9800 . ? 
C3_29 O3_29 1.386(15) . ? 
C3_29 C4_29 1.498(18) . ? 
C3_29 H3_29 0.9900 . ? 
O3_29 C7_29 1.439(18) . ? 
C7_29 H7A_29 0.9700 . ? 
C7_29 H7B_29 0.9700 . ? 
C7_29 H7C_29 0.9700 . ? 
C4_29 C5_29 1.480(16) . ? 
C4_29 H4A_29 0.9800 . ? 
C4_29 H4B_29 0.9800 . ? 
C5_29 H5A_29 0.9800 . ? 
C5_29 H5B_29 0.9800 . ? 
C6_29 O6_29 1.221(14) . ? 
C6_29 O8_29 1.325(15) . ? 
O8_29 C8_29 1.406(15) . ? 
C8_29 H8A_29 0.9700 . ? 
C8_29 H8B_29 0.9700 . ? 
C8_29 H8C_29 0.9700 . ? 
O1_31 H1_31 0.871(8) . ? 
O1_31 H2_31 0.848(7) . ? 
O1_32 H1_32 0.814(7) . ? 
O1_32 H2_32 0.845(7) . ? 
O1_33 H1_33 0.802(10) . ? 
O1_33 H2_33 0.816(9) . ? 
O1_34 H1_34 0.817(14) . ? 
O1_34 H2_34 0.799(15) . ? 
 
loop_ 
 _geom_angle_atom_site_label_1 
 _geom_angle_atom_site_label_2 
 _geom_angle_atom_site_label_3 
 _geom_angle 
 _geom_angle_site_symmetry_1 
 _geom_angle_site_symmetry_3 
 _geom_angle_publ_flag 
O1_10 C1_10 C3_10 101.4(9) . . ? 
O1_10 C1_10 C2_10 110.9(9) . . ? 
C3_10 C1_10 C2_10 110.0(10) . . ? 
O1_10 C1_10 C4_10 110.3(9) . . ? 
C3_10 C1_10 C4_10 113.4(10) . . ? 
C2_10 C1_10 C4_10 110.5(11) . . ? 
C1_10 C2_10 H2A_10 109.5 . . ? 
C1_10 C2_10 H2B_10 109.5 . . ? 
H2A_10 C2_10 H2B_10 109.5 . . ? 
C1_10 C2_10 H2C_10 109.5 . . ? 
H2A_10 C2_10 H2C_10 109.5 . . ? 
H2B_10 C2_10 H2C_10 109.5 . . ? 
C1_10 C3_10 H3A_10 109.5 . . ? 
C1_10 C3_10 H3B_10 109.5 . . ? 
H3A_10 C3_10 H3B_10 109.5 . . ? 
C1_10 C3_10 H3C_10 109.5 . . ? 
H3A_10 C3_10 H3C_10 109.5 . . ? 
H3B_10 C3_10 H3C_10 109.5 . . ? 
C1_10 C4_10 H4A_10 109.5 . . ? 
C1_10 C4_10 H4B_10 109.5 . . ? 
H4A_10 C4_10 H4B_10 109.5 . . ? 
C1_10 C4_10 H4C_10 109.5 . . ? 
H4A_10 C4_10 H4C_10 109.5 . . ? 
H4B_10 C4_10 H4C_10 109.5 . . ? 
C5_10 O1_10 C1_10 121.8(8) . . ? 
O5_10 C5_10 O1_10 127.2(9) . . ? 
O5_10 C5_10 N1_11 122.5(10) . . ? 
O1_10 C5_10 N1_11 110.2(9) . . ? 
C5_10 N1_11 C1_11 121.2(8) . . ? 
C5_10 N1_11 H1_11 119.4 . . ? 
C1_11 N1_11 H1_11 119.4 . . ? 
N1_11 C1_11 C6_11 113.0(8) . . ? 
N1_11 C1_11 C2_11 110.9(7) . . ? 
C6_11 C1_11 C2_11 109.9(8) . . ? 
N1_11 C1_11 H1A_11 107.6 . . ? 
C6_11 C1_11 H1A_11 107.6 . . ? 
C2_11 C1_11 H1A_11 107.6 . . ? 
C3_11 C2_11 C1_11 114.7(8) . . ? 
C3_11 C2_11 H2A_11 108.6 . . ? 
C1_11 C2_11 H2A_11 108.6 . . ? 
C3_11 C2_11 H2B_11 108.6 . . ? 
C1_11 C2_11 H2B_11 108.6 . . ? 
H2A_11 C2_11 H2B_11 107.6 . . ? 
C2_11 C3_11 C4_11 112.7(9) . . ? 
C2_11 C3_11 C5_11 109.1(9) . . ? 
C4_11 C3_11 C5_11 110.9(10) . . ? 
C2_11 C3_11 H3_11 108.0 . . ? 
C4_11 C3_11 H3_11 108.0 . . ? 
C5_11 C3_11 H3_11 108.0 . . ? 
C3_11 C4_11 H4A_11 109.5 . . ? 
C3_11 C4_11 H4B_11 109.5 . . ? 
H4A_11 C4_11 H4B_11 109.5 . . ? 
C3_11 C4_11 H4C_11 109.5 . . ? 
H4A_11 C4_11 H4C_11 109.5 . . ? 
H4B_11 C4_11 H4C_11 109.5 . . ? 
C3_11 C5_11 H5A_11 109.5 . . ? 
C3_11 C5_11 H5B_11 109.5 . . ? 
H5A_11 C5_11 H5B_11 109.5 . . ? 
C3_11 C5_11 H5C_11 109.5 . . ? 
H5A_11 C5_11 H5C_11 109.5 . . ? 
H5B_11 C5_11 H5C_11 109.5 . . ? 
O6_11 C6_11 N1_12 121.1(9) . . ? 
O6_11 C6_11 C1_11 117.8(9) . . ? 
N1_12 C6_11 C1_11 121.1(8) . . ? 
C6_11 N1_12 C1_12 119.8(8) . . ? 
C6_11 N1_12 H1_12 120.1 . . ? 
C1_12 N1_12 H1_12 120.1 . . ? 
N1_12 C1_12 C2_12 112.4(8) . . ? 
N1_12 C1_12 C6_12 109.8(8) . . ? 
C2_12 C1_12 C6_12 113.4(9) . . ? 
N1_12 C1_12 H1A_12 107.0 . . ? 
C2_12 C1_12 H1A_12 107.0 . . ? 
C6_12 C1_12 H1A_12 107.0 . . ? 
C1_12 C2_12 C3_12 114.7(9) . . ? 
C1_12 C2_12 H2A_12 108.6 . . ? 
C3_12 C2_12 H2A_12 108.6 . . ? 
C1_12 C2_12 H2B_12 108.6 . . ? 
C3_12 C2_12 H2B_12 108.6 . . ? 
H2A_12 C2_12 H2B_12 107.6 . . ? 
C4_12 C3_12 C2_12 113.4(11) . . ? 
C4_12 C3_12 C5_12 111.7(11) . . ? 
C2_12 C3_12 C5_12 109.7(10) . . ? 
C4_12 C3_12 H3_12 107.3 . . ? 
C2_12 C3_12 H3_12 107.3 . . ? 
C5_12 C3_12 H3_12 107.3 . . ? 
C3_12 C4_12 H4A_12 109.5 . . ? 
C3_12 C4_12 H4B_12 109.5 . . ? 
H4A_12 C4_12 H4B_12 109.5 . . ? 
C3_12 C4_12 H4C_12 109.5 . . ? 
H4A_12 C4_12 H4C_12 109.5 . . ? 
H4B_12 C4_12 H4C_12 109.5 . . ? 
C3_12 C5_12 H5A_12 109.5 . . ? 
C3_12 C5_12 H5B_12 109.5 . . ? 
H5A_12 C5_12 H5B_12 109.5 . . ? 
C3_12 C5_12 H5C_12 109.5 . . ? 
H5A_12 C5_12 H5C_12 109.5 . . ? 
H5B_12 C5_12 H5C_12 109.5 . . ? 
O6_12 C6_12 N1_13 122.3(10) . . ? 
O6_12 C6_12 C1_12 122.4(11) . . ? 
N1_13 C6_12 C1_12 115.3(9) . . ? 
C6_12 N1_13 C1_13 122.5(8) . . ? 
C6_12 N1_13 H1_13 118.7 . . ? 
C1_13 N1_13 H1_13 118.7 . . ? 
N1_13 C1_13 C6_13 110.8(8) . . ? 
N1_13 C1_13 C2_13 108.9(8) . . ? 
C6_13 C1_13 C2_13 113.8(9) . . ? 
N1_13 C1_13 C5_13 109.9(8) . . ? 
C6_13 C1_13 C5_13 112.3(8) . . ? 
C2_13 C1_13 C5_13 100.7(9) . . ? 
C3_13 C2_13 C1_13 110.8(11) . . ? 
C3_13 C2_13 H2A_13 109.5 . . ? 
C1_13 C2_13 H2A_13 109.5 . . ? 
C3_13 C2_13 H2B_13 109.5 . . ? 
C1_13 C2_13 H2B_13 109.5 . . ? 
H2A_13 C2_13 H2B_13 108.1 . . ? 
C4_13 C3_13 C2_13 104.9(12) . . ? 
C4_13 C3_13 O3_13 116.6(14) . . ? 
C2_13 C3_13 O3_13 104.1(13) . . ? 
C4_13 C3_13 H3_13 110.3 . . ? 
C2_13 C3_13 H3_13 110.3 . . ? 
O3_13 C3_13 H3_13 110.3 . . ? 
C3_13 C4_13 C5_13 109.1(11) . . ? 
C3_13 C4_13 H4A_13 109.9 . . ? 
C5_13 C4_13 H4A_13 109.9 . . ? 
C3_13 C4_13 H4B_13 109.9 . . ? 
C5_13 C4_13 H4B_13 109.9 . . ? 
H4A_13 C4_13 H4B_13 108.3 . . ? 
C4_13 C5_13 C1_13 101.6(9) . . ? 
C4_13 C5_13 H5A_13 111.5 . . ? 
C1_13 C5_13 H5A_13 111.5 . . ? 
C4_13 C5_13 H5B_13 111.5 . . ? 
C1_13 C5_13 H5B_13 111.5 . . ? 
H5A_13 C5_13 H5B_13 109.3 . . ? 
C7_13 O3_13 C3_13 115.2(16) . . ? 
O3_13 C7_13 H7A_13 109.5 . . ? 
O3_13 C7_13 H7B_13 109.5 . . ? 
H7A_13 C7_13 H7B_13 109.5 . . ? 
O3_13 C7_13 H7C_13 109.5 . . ? 
H7A_13 C7_13 H7C_13 109.5 . . ? 
H7B_13 C7_13 H7C_13 109.5 . . ? 
O6_13 C6_13 N1_14 120.9(9) . . ? 
O6_13 C6_13 C1_13 124.3(9) . . ? 
N1_14 C6_13 C1_13 114.6(9) . . ? 
C6_13 N1_14 C1_14 121.6(8) . . ? 
C6_13 N1_14 H1_14 119.2 . . ? 
C1_14 N1_14 H1_14 119.2 . . ? 
N1_14 C1_14 C2_14 111.3(8) . . ? 
N1_14 C1_14 C6_14 111.3(8) . . ? 
C2_14 C1_14 C6_14 109.9(8) . . ? 
N1_14 C1_14 H1A_14 108.1 . . ? 
C2_14 C1_14 H1A_14 108.1 . . ? 
C6_14 C1_14 H1A_14 108.1 . . ? 
C1_14 C2_14 C3_14 116.1(10) . . ? 
C1_14 C2_14 H2A_14 108.3 . . ? 
C3_14 C2_14 H2A_14 108.3 . . ? 
C1_14 C2_14 H2B_14 108.3 . . ? 
C3_14 C2_14 H2B_14 108.3 . . ? 
H2A_14 C2_14 H2B_14 107.4 . . ? 
C5_14 C3_14 C2_14 109.9(10) . . ? 
C5_14 C3_14 C4_14 111.4(12) . . ? 
C2_14 C3_14 C4_14 109.5(12) . . ? 
C5_14 C3_14 H3_14 108.7 . . ? 
C2_14 C3_14 H3_14 108.7 . . ? 
C4_14 C3_14 H3_14 108.7 . . ? 
C3_14 C4_14 H4A_14 109.5 . . ? 
C3_14 C4_14 H4B_14 109.5 . . ? 
H4A_14 C4_14 H4B_14 109.5 . . ? 
C3_14 C4_14 H4C_14 109.5 . . ? 
H4A_14 C4_14 H4C_14 109.5 . . ? 
H4B_14 C4_14 H4C_14 109.5 . . ? 
C3_14 C5_14 H5A_14 109.5 . . ? 
C3_14 C5_14 H5B_14 109.5 . . ? 
H5A_14 C5_14 H5B_14 109.5 . . ? 
C3_14 C5_14 H5C_14 109.5 . . ? 
H5A_14 C5_14 H5C_14 109.5 . . ? 
H5B_14 C5_14 H5C_14 109.5 . . ? 
O6_14 C6_14 N1_15 120.8(10) . . ? 
O6_14 C6_14 C1_14 118.9(10) . . ? 
N1_15 C6_14 C1_14 120.2(9) . . ? 
C6_14 N1_15 C1_15 121.7(8) . . ? 
C6_14 N1_15 H1_15 119.2 . . ? 
C1_15 N1_15 H1_15 119.2 . . ? 
N1_15 C1_15 C2_15 110.6(8) . . ? 
N1_15 C1_15 C6_15 110.4(8) . . ? 
C2_15 C1_15 C6_15 115.9(9) . . ? 
N1_15 C1_15 H1A_15 106.4 . . ? 
C2_15 C1_15 H1A_15 106.4 . . ? 
C6_15 C1_15 H1A_15 106.4 . . ? 
C1_15 C2_15 C3_15 115.2(10) . . ? 
C1_15 C2_15 H2A_15 108.5 . . ? 
C3_15 C2_15 H2A_15 108.5 . . ? 
C1_15 C2_15 H2B_15 108.5 . . ? 
C3_15 C2_15 H2B_15 108.5 . . ? 
H2A_15 C2_15 H2B_15 107.5 . . ? 
C4_15 C3_15 C5_15 108.5(16) . . ? 
C4_15 C3_15 C2_15 106.8(15) . . ? 
C5_15 C3_15 C2_15 107.0(13) . . ? 
C4_15 C3_15 H3_15 111.4 . . ? 
C5_15 C3_15 H3_15 111.4 . . ? 
C2_15 C3_15 H3_15 111.4 . . ? 
C3_15 C4_15 H4A_15 109.5 . . ? 
C3_15 C4_15 H4B_15 109.5 . . ? 
H4A_15 C4_15 H4B_15 109.5 . . ? 
C3_15 C4_15 H4C_15 109.5 . . ? 
H4A_15 C4_15 H4C_15 109.5 . . ? 
H4B_15 C4_15 H4C_15 109.5 . . ? 
C3_15 C5_15 H5A_15 109.5 . . ? 
C3_15 C5_15 H5B_15 109.5 . . ? 
H5A_15 C5_15 H5B_15 109.5 . . ? 
C3_15 C5_15 H5C_15 109.5 . . ? 
H5A_15 C5_15 H5C_15 109.5 . . ? 
H5B_15 C5_15 H5C_15 109.5 . . ? 
O6_15 C6_15 N1_16 122.4(10) . . ? 
O6_15 C6_15 C1_15 120.8(10) . . ? 
N1_16 C6_15 C1_15 116.8(9) . . ? 
C6_15 N1_16 C1_16 121.8(8) . . ? 
C6_15 N1_16 H1_16 119.1 . . ? 
C1_16 N1_16 H1_16 119.1 . . ? 
N1_16 C1_16 C2_16 110.7(8) . . ? 
N1_16 C1_16 C6_16 108.7(8) . . ? 
C2_16 C1_16 C6_16 111.4(9) . . ? 
N1_16 C1_16 C5_16 110.5(9) . . ? 
C2_16 C1_16 C5_16 101.8(8) . . ? 
C6_16 C1_16 C5_16 113.6(8) . . ? 
C3_16 C2_16 C1_16 108.3(10) . . ? 
C3_16 C2_16 H2A_16 110.0 . . ? 
C1_16 C2_16 H2A_16 110.0 . . ? 
C3_16 C2_16 H2B_16 110.0 . . ? 
C1_16 C2_16 H2B_16 110.0 . . ? 
H2A_16 C2_16 H2B_16 108.4 . . ? 
C4_16 C3_16 O3_16 114.8(13) . . ? 
C4_16 C3_16 C2_16 104.1(10) . . ? 
O3_16 C3_16 C2_16 107.6(10) . . ? 
C4_16 C3_16 H3_16 110.0 . . ? 
O3_16 C3_16 H3_16 110.0 . . ? 
C2_16 C3_16 H3_16 110.0 . . ? 
C7_16 O3_16 C3_16 113.0(11) . . ? 
O3_16 C7_16 H7A_16 109.5 . . ? 
O3_16 C7_16 H7B_16 109.5 . . ? 
H7A_16 C7_16 H7B_16 109.5 . . ? 
O3_16 C7_16 H7C_16 109.5 . . ? 
H7A_16 C7_16 H7C_16 109.5 . . ? 
H7B_16 C7_16 H7C_16 109.5 . . ? 
C3_16 C4_16 C5_16 111.6(12) . . ? 
C3_16 C4_16 H4A_16 109.3 . . ? 
C5_16 C4_16 H4A_16 109.3 . . ? 
C3_16 C4_16 H4B_16 109.3 . . ? 
C5_16 C4_16 H4B_16 109.3 . . ? 
H4A_16 C4_16 H4B_16 108.0 . . ? 
C4_16 C5_16 C1_16 100.8(10) . . ? 
C4_16 C5_16 H5A_16 111.6 . . ? 
C1_16 C5_16 H5A_16 111.6 . . ? 
C4_16 C5_16 H5B_16 111.6 . . ? 
C1_16 C5_16 H5B_16 111.6 . . ? 
H5A_16 C5_16 H5B_16 109.4 . . ? 
O6_16 C6_16 N1_17 121.6(9) . . ? 
O6_16 C6_16 C1_16 122.9(10) . . ? 
N1_17 C6_16 C1_16 115.3(9) . . ? 
C6_16 N1_17 C1_17 122.3(8) . . ? 
C6_16 N1_17 H1_17 118.8 . . ? 
C1_17 N1_17 H1_17 118.8 . . ? 
N1_17 C1_17 C6_17 112.4(7) . . ? 
N1_17 C1_17 C2_17 107.4(7) . . ? 
C6_17 C1_17 C2_17 109.9(7) . . ? 
N1_17 C1_17 H1A_17 109.0 . . ? 
C6_17 C1_17 H1A_17 109.0 . . ? 
C2_17 C1_17 H1A_17 109.0 . . ? 
C1_17 C2_17 C3_17 116.8(8) . . ? 
C1_17 C2_17 H2A_17 108.1 . . ? 
C3_17 C2_17 H2A_17 108.1 . . ? 
C1_17 C2_17 H2B_17 108.1 . . ? 
C3_17 C2_17 H2B_17 108.1 . . ? 
H2A_17 C2_17 H2B_17 107.3 . . ? 
C2_17 C3_17 C4_17 111.0(9) . . ? 
C2_17 C3_17 C5_17 110.8(9) . . ? 
C4_17 C3_17 C5_17 110.7(10) . . ? 
C2_17 C3_17 H3_17 108.1 . . ? 
C4_17 C3_17 H3_17 108.1 . . ? 
C5_17 C3_17 H3_17 108.1 . . ? 
C3_17 C4_17 H4A_17 109.5 . . ? 
C3_17 C4_17 H4B_17 109.5 . . ? 
H4A_17 C4_17 H4B_17 109.5 . . ? 
C3_17 C4_17 H4C_17 109.5 . . ? 
H4A_17 C4_17 H4C_17 109.5 . . ? 
H4B_17 C4_17 H4C_17 109.5 . . ? 
C3_17 C5_17 H5A_17 109.5 . . ? 
C3_17 C5_17 H5B_17 109.5 . . ? 
H5A_17 C5_17 H5B_17 109.5 . . ? 
C3_17 C5_17 H5C_17 109.5 . . ? 
H5A_17 C5_17 H5C_17 109.5 . . ? 
H5B_17 C5_17 H5C_17 109.5 . . ? 
O6_17 C6_17 N1_18 121.4(9) . . ? 
O6_17 C6_17 C1_17 120.5(9) . . ? 
N1_18 C6_17 C1_17 118.1(8) . . ? 
C6_17 N1_18 C1_18 122.3(8) . . ? 
C6_17 N1_18 H1_18 118.9 . . ? 
C1_18 N1_18 H1_18 118.9 . . ? 
N1_18 C1_18 C6_18 113.4(8) . . ? 
N1_18 C1_18 C2_18 112.0(7) . . ? 
C6_18 C1_18 C2_18 109.4(8) . . ? 
N1_18 C1_18 H1A_18 107.2 . . ? 
C6_18 C1_18 H1A_18 107.2 . . ? 
C2_18 C1_18 H1A_18 107.2 . . ? 
C1_18 C2_18 C3_18 113.6(8) . . ? 
C1_18 C2_18 H2A_18 108.8 . . ? 
C3_18 C2_18 H2A_18 108.8 . . ? 
C1_18 C2_18 H2B_18 108.8 . . ? 
C3_18 C2_18 H2B_18 108.8 . . ? 
H2A_18 C2_18 H2B_18 107.7 . . ? 
C5_18 C3_18 C4_18 110.1(11) . . ? 
C5_18 C3_18 C2_18 115.2(10) . . ? 
C4_18 C3_18 C2_18 109.2(10) . . ? 
C5_18 C3_18 H3_18 107.3 . . ? 
C4_18 C3_18 H3_18 107.3 . . ? 
C2_18 C3_18 H3_18 107.3 . . ? 
C3_18 C4_18 H4A_18 109.5 . . ? 
C3_18 C4_18 H4B_18 109.5 . . ? 
H4A_18 C4_18 H4B_18 109.5 . . ? 
C3_18 C4_18 H4C_18 109.5 . . ? 
H4A_18 C4_18 H4C_18 109.5 . . ? 
H4B_18 C4_18 H4C_18 109.5 . . ? 
C3_18 C5_18 H5A_18 109.5 . . ? 
C3_18 C5_18 H5B_18 109.5 . . ? 
H5A_18 C5_18 H5B_18 109.5 . . ? 
C3_18 C5_18 H5C_18 109.5 . . ? 
H5A_18 C5_18 H5C_18 109.5 . . ? 
H5B_18 C5_18 H5C_18 109.5 . . ? 
O6_18 C6_18 N1_19 121.5(9) . . ? 
O6_18 C6_18 C1_18 120.6(9) . . ? 
N1_19 C6_18 C1_18 117.8(9) . . ? 
C6_18 N1_19 C1_19 119.1(8) . . ? 
C6_18 N1_19 H1_19 120.5 . . ? 
C1_19 N1_19 H1_19 120.5 . . ? 
N1_19 C1_19 C6_19 110.9(10) . . ? 
N1_19 C1_19 C2_19 111.5(9) . . ? 
C6_19 C1_19 C2_19 112.3(9) . . ? 
N1_19 C1_19 C5_19 109.1(8) . . ? 
C6_19 C1_19 C5_19 111.2(9) . . ? 
C2_19 C1_19 C5_19 101.5(9) . . ? 
C3_19 C2_19 C1_19 106.3(9) . . ? 
C3_19 C2_19 H2A_19 110.5 . . ? 
C1_19 C2_19 H2A_19 110.5 . . ? 
C3_19 C2_19 H2B_19 110.5 . . ? 
C1_19 C2_19 H2B_19 110.5 . . ? 
H2A_19 C2_19 H2B_19 108.7 . . ? 
O3_19 C3_19 C2_19 107.8(10) . . ? 
O3_19 C3_19 C4_19 111.1(11) . . ? 
C2_19 C3_19 C4_19 107.3(10) . . ? 
O3_19 C3_19 H3_19 110.2 . . ? 
C2_19 C3_19 H3_19 110.2 . . ? 
C4_19 C3_19 H3_19 110.2 . . ? 
C7_19 O3_19 C3_19 109.8(15) . . ? 
C3_19 C4_19 C5_19 105.7(10) . . ? 
C3_19 C4_19 H4A_19 110.6 . . ? 
C5_19 C4_19 H4A_19 110.6 . . ? 
C3_19 C4_19 H4B_19 110.6 . . ? 
C5_19 C4_19 H4B_19 110.6 . . ? 
H4A_19 C4_19 H4B_19 108.7 . . ? 
C4_19 C5_19 C1_19 102.3(9) . . ? 
C4_19 C5_19 H5A_19 111.3 . . ? 
C1_19 C5_19 H5A_19 111.3 . . ? 
C4_19 C5_19 H5B_19 111.3 . . ? 
C1_19 C5_19 H5B_19 111.3 . . ? 
H5A_19 C5_19 H5B_19 109.2 . . ? 
O3_19 C7_19 H7A_19 109.5 . . ? 
O3_19 C7_19 H7B_19 109.5 . . ? 
H7A_19 C7_19 H7B_19 109.5 . . ? 
O3_19 C7_19 H7C_19 109.5 . . ? 
H7A_19 C7_19 H7C_19 109.5 . . ? 
H7B_19 C7_19 H7C_19 109.5 . . ? 
O6_19 C6_19 O8_19 125.2(13) . . ? 
O6_19 C6_19 C1_19 123.4(14) . . ? 
O8_19 C6_19 C1_19 111.3(11) . . ? 
C6_19 O8_19 C8_19 116.0(11) . . ? 
O8_19 C8_19 H8A_19 109.5 . . ? 
O8_19 C8_19 H8B_19 109.5 . . ? 
H8A_19 C8_19 H8B_19 109.5 . . ? 
O8_19 C8_19 H8C_19 109.5 . . ? 
H8A_19 C8_19 H8C_19 109.5 . . ? 
H8B_19 C8_19 H8C_19 109.5 . . ? 
O1_20 C1_20 C2_20 110.3(8) . . ? 
O1_20 C1_20 C3_20 101.9(9) . . ? 
C2_20 C1_20 C3_20 110.3(11) . . ? 
O1_20 C1_20 C4_20 110.5(10) . . ? 
C2_20 C1_20 C4_20 111.0(11) . . ? 
C3_20 C1_20 C4_20 112.4(11) . . ? 
C1_20 C2_20 H2A_20 109.5 . . ? 
C1_20 C2_20 H2B_20 109.5 . . ? 
H2A_20 C2_20 H2B_20 109.5 . . ? 
C1_20 C2_20 H2C_20 109.5 . . ? 
H2A_20 C2_20 H2C_20 109.5 . . ? 
H2B_20 C2_20 H2C_20 109.5 . . ? 
C1_20 C3_20 H3A_20 109.5 . . ? 
C1_20 C3_20 H3B_20 109.5 . . ? 
H3A_20 C3_20 H3B_20 109.5 . . ? 
C1_20 C3_20 H3C_20 109.5 . . ? 
H3A_20 C3_20 H3C_20 109.5 . . ? 
H3B_20 C3_20 H3C_20 109.5 . . ? 
C1_20 C4_20 H4A_20 109.5 . . ? 
C1_20 C4_20 H4B_20 109.5 . . ? 
H4A_20 C4_20 H4B_20 109.5 . . ? 
C1_20 C4_20 H4C_20 109.5 . . ? 
H4A_20 C4_20 H4C_20 109.5 . . ? 
H4B_20 C4_20 H4C_20 109.5 . . ? 
C5_20 O1_20 C1_20 121.1(8) . . ? 
O5_20 C5_20 O1_20 126.9(10) . . ? 
O5_20 C5_20 N1_21 123.8(11) . . ? 
O1_20 C5_20 N1_21 109.3(10) . . ? 
C5_20 N1_21 C1_21 120.2(9) . . ? 
C5_20 N1_21 H1_21 119.9 . . ? 
C1_21 N1_21 H1_21 119.9 . . ? 
N1_21 C1_21 C6_21 114.1(8) . . ? 
N1_21 C1_21 C2_21 109.7(8) . . ? 
C6_21 C1_21 C2_21 110.0(8) . . ? 
N1_21 C1_21 H1A_21 107.6 . . ? 
C6_21 C1_21 H1A_21 107.6 . . ? 
C2_21 C1_21 H1A_21 107.6 . . ? 
C3_21 C2_21 C1_21 114.5(8) . . ? 
C3_21 C2_21 H2A_21 108.6 . . ? 
C1_21 C2_21 H2A_21 108.6 . . ? 
C3_21 C2_21 H2B_21 108.6 . . ? 
C1_21 C2_21 H2B_21 108.6 . . ? 
H2A_21 C2_21 H2B_21 107.6 . . ? 
C5_21 C3_21 C2_21 112.9(9) . . ? 
C5_21 C3_21 C4_21 110.8(9) . . ? 
C2_21 C3_21 C4_21 109.9(9) . . ? 
C5_21 C3_21 H3_21 107.7 . . ? 
C2_21 C3_21 H3_21 107.7 . . ? 
C4_21 C3_21 H3_21 107.7 . . ? 
C3_21 C4_21 H4A_21 109.5 . . ? 
C3_21 C4_21 H4B_21 109.5 . . ? 
H4A_21 C4_21 H4B_21 109.5 . . ? 
C3_21 C4_21 H4C_21 109.5 . . ? 
H4A_21 C4_21 H4C_21 109.5 . . ? 
H4B_21 C4_21 H4C_21 109.5 . . ? 
C3_21 C5_21 H5A_21 109.5 . . ? 
C3_21 C5_21 H5B_21 109.5 . . ? 
H5A_21 C5_21 H5B_21 109.5 . . ? 
C3_21 C5_21 H5C_21 109.5 . . ? 
H5A_21 C5_21 H5C_21 109.5 . . ? 
H5B_21 C5_21 H5C_21 109.5 . . ? 
O6_21 C6_21 N1_22 121.6(9) . . ? 
O6_21 C6_21 C1_21 121.4(9) . . ? 
N1_22 C6_21 C1_21 117.0(9) . . ? 
C6_21 N1_22 C1_22 120.3(8) . . ? 
C6_21 N1_22 H1_22 119.8 . . ? 
C1_22 N1_22 H1_22 119.8 . . ? 
N1_22 C1_22 C2_22 110.6(7) . . ? 
N1_22 C1_22 C6_22 111.7(8) . . ? 
C2_22 C1_22 C6_22 114.5(8) . . ? 
N1_22 C1_22 H1A_22 106.5 . . ? 
C2_22 C1_22 H1A_22 106.5 . . ? 
C6_22 C1_22 H1A_22 106.5 . . ? 
C1_22 C2_22 C3_22 114.5(8) . . ? 
C1_22 C2_22 H2A_22 108.6 . . ? 
C3_22 C2_22 H2A_22 108.6 . . ? 
C1_22 C2_22 H2B_22 108.6 . . ? 
C3_22 C2_22 H2B_22 108.6 . . ? 
H2A_22 C2_22 H2B_22 107.6 . . ? 
C5_22 C3_22 C4_22 108.7(11) . . ? 
C5_22 C3_22 C2_22 109.1(8) . . ? 
C4_22 C3_22 C2_22 114.7(11) . . ? 
C5_22 C3_22 H3_22 108.0 . . ? 
C4_22 C3_22 H3_22 108.0 . . ? 
C2_22 C3_22 H3_22 108.0 . . ? 
C3_22 C4_22 H4A_22 109.5 . . ? 
C3_22 C4_22 H4B_22 109.5 . . ? 
H4A_22 C4_22 H4B_22 109.5 . . ? 
C3_22 C4_22 H4C_22 109.5 . . ? 
H4A_22 C4_22 H4C_22 109.5 . . ? 
H4B_22 C4_22 H4C_22 109.5 . . ? 
C3_22 C5_22 H5A_22 109.5 . . ? 
C3_22 C5_22 H5B_22 109.5 . . ? 
H5A_22 C5_22 H5B_22 109.5 . . ? 
C3_22 C5_22 H5C_22 109.5 . . ? 
H5A_22 C5_22 H5C_22 109.5 . . ? 
H5B_22 C5_22 H5C_22 109.5 . . ? 
O6_22 C6_22 N1_23 123.3(10) . . ? 
O6_22 C6_22 C1_22 120.0(10) . . ? 
N1_23 C6_22 C1_22 116.7(9) . . ? 
C6_22 N1_23 C1_23 121.4(7) . . ? 
C6_22 N1_23 H1_23 119.3 . . ? 
C1_23 N1_23 H1_23 119.3 . . ? 
N1_23 C1_23 C5_23 111.7(8) . . ? 
N1_23 C1_23 C2_23 109.7(7) . . ? 
C5_23 C1_23 C2_23 103.1(8) . . ? 
N1_23 C1_23 C6_23 109.8(8) . . ? 
C5_23 C1_23 C6_23 113.7(8) . . ? 
C2_23 C1_23 C6_23 108.5(8) . . ? 
C3_23 C2_23 C1_23 105.7(8) . . ? 
C3_23 C2_23 H2A_23 110.6 . . ? 
C1_23 C2_23 H2A_23 110.6 . . ? 
C3_23 C2_23 H2B_23 110.6 . . ? 
C1_23 C2_23 H2B_23 110.6 . . ? 
H2A_23 C2_23 H2B_23 108.7 . . ? 
O3_23 C3_23 C2_23 105.9(8) . . ? 
O3_23 C3_23 C4_23 114.2(10) . . ? 
C2_23 C3_23 C4_23 106.5(9) . . ? 
O3_23 C3_23 H3_23 110.0 . . ? 
C2_23 C3_23 H3_23 110.0 . . ? 
C4_23 C3_23 H3_23 110.0 . . ? 
C3_23 O3_23 C7_23 115.7(11) . . ? 
O3_23 C7_23 H7A_23 109.5 . . ? 
O3_23 C7_23 H7B_23 109.5 . . ? 
H7A_23 C7_23 H7B_23 109.5 . . ? 
O3_23 C7_23 H7C_23 109.5 . . ? 
H7A_23 C7_23 H7C_23 109.5 . . ? 
H7B_23 C7_23 H7C_23 109.5 . . ? 
C5_23 C4_23 C3_23 103.9(8) . . ? 
C5_23 C4_23 H4A_23 111.0 . . ? 
C3_23 C4_23 H4A_23 111.0 . . ? 
C5_23 C4_23 H4B_23 111.0 . . ? 
C3_23 C4_23 H4B_23 111.0 . . ? 
H4A_23 C4_23 H4B_23 109.0 . . ? 
C4_23 C5_23 C1_23 102.6(8) . . ? 
C4_23 C5_23 H5A_23 111.3 . . ? 
C1_23 C5_23 H5A_23 111.3 . . ? 
C4_23 C5_23 H5B_23 111.3 . . ? 
C1_23 C5_23 H5B_23 111.3 . . ? 
H5A_23 C5_23 H5B_23 109.2 . . ? 
O6_23 C6_23 N1_24 121.1(9) . . ? 
O6_23 C6_23 C1_23 122.9(9) . . ? 
N1_24 C6_23 C1_23 116.0(9) . . ? 
C6_23 N1_24 C1_24 121.0(8) . . ? 
C6_23 N1_24 H1_24 119.5 . . ? 
C1_24 N1_24 H1_24 119.5 . . ? 
N1_24 C1_24 C6_24 111.0(7) . . ? 
N1_24 C1_24 C2_24 109.0(7) . . ? 
C6_24 C1_24 C2_24 109.5(8) . . ? 
N1_24 C1_24 H1A_24 109.1 . . ? 
C6_24 C1_24 H1A_24 109.1 . . ? 
C2_24 C1_24 H1A_24 109.1 . . ? 
C1_24 C2_24 C3_24 115.6(8) . . ? 
C1_24 C2_24 H2A_24 108.4 . . ? 
C3_24 C2_24 H2A_24 108.4 . . ? 
C1_24 C2_24 H2B_24 108.4 . . ? 
C3_24 C2_24 H2B_24 108.4 . . ? 
H2A_24 C2_24 H2B_24 107.4 . . ? 
C5_24 C3_24 C4_24 113.0(12) . . ? 
C5_24 C3_24 C2_24 113.4(11) . . ? 
C4_24 C3_24 C2_24 109.3(10) . . ? 
C5_24 C3_24 H3_24 106.9 . . ? 
C4_24 C3_24 H3_24 106.9 . . ? 
C2_24 C3_24 H3_24 106.9 . . ? 
C3_24 C4_24 H4A_24 109.5 . . ? 
C3_24 C4_24 H4B_24 109.5 . . ? 
H4A_24 C4_24 H4B_24 109.5 . . ? 
C3_24 C4_24 H4C_24 109.5 . . ? 
H4A_24 C4_24 H4C_24 109.5 . . ? 
H4B_24 C4_24 H4C_24 109.5 . . ? 
C3_24 C5_24 H5A_24 109.5 . . ? 
C3_24 C5_24 H5B_24 109.5 . . ? 
H5A_24 C5_24 H5B_24 109.5 . . ? 
C3_24 C5_24 H5C_24 109.5 . . ? 
H5A_24 C5_24 H5C_24 109.5 . . ? 
H5B_24 C5_24 H5C_24 109.5 . . ? 
O6_24 C6_24 N1_25 122.4(10) . . ? 
O6_24 C6_24 C1_24 119.8(10) . . ? 
N1_25 C6_24 C1_24 117.8(8) . . ? 
C6_24 N1_25 C1_25 120.9(8) . . ? 
C6_24 N1_25 H1_25 119.6 . . ? 
C1_25 N1_25 H1_25 119.6 . . ? 
N1_25 C1_25 C2_25 109.8(8) . . ? 
N1_25 C1_25 C6_25 112.4(8) . . ? 
C2_25 C1_25 C6_25 113.4(9) . . ? 
N1_25 C1_25 H1A_25 106.9 . . ? 
C2_25 C1_25 H1A_25 106.9 . . ? 
C6_25 C1_25 H1A_25 106.9 . . ? 
C1_25 C2_25 C3_25 117.0(10) . . ? 
C1_25 C2_25 H2A_25 108.1 . . ? 
C3_25 C2_25 H2A_25 108.1 . . ? 
C1_25 C2_25 H2B_25 108.1 . . ? 
C3_25 C2_25 H2B_25 108.1 . . ? 
H2A_25 C2_25 H2B_25 107.3 . . ? 
C4_25 C3_25 C5_25 112.5(14) . . ? 
C4_25 C3_25 C2_25 107.5(13) . . ? 
C5_25 C3_25 C2_25 114.2(11) . . ? 
C4_25 C3_25 H3_25 107.4 . . ? 
C5_25 C3_25 H3_25 107.4 . . ? 
C2_25 C3_25 H3_25 107.4 . . ? 
C3_25 C4_25 H4A_25 109.5 . . ? 
C3_25 C4_25 H4B_25 109.5 . . ? 
H4A_25 C4_25 H4B_25 109.5 . . ? 
C3_25 C4_25 H4C_25 109.5 . . ? 
H4A_25 C4_25 H4C_25 109.5 . . ? 
H4B_25 C4_25 H4C_25 109.5 . . ? 
C3_25 C5_25 H5A_25 109.5 . . ? 
C3_25 C5_25 H5B_25 109.5 . . ? 
H5A_25 C5_25 H5B_25 109.5 . . ? 
C3_25 C5_25 H5C_25 109.5 . . ? 
H5A_25 C5_25 H5C_25 109.5 . . ? 
H5B_25 C5_25 H5C_25 109.5 . . ? 
O6_25 C6_25 N1_26 125.0(10) . . ? 
O6_25 C6_25 C1_25 118.5(10) . . ? 
N1_26 C6_25 C1_25 116.5(9) . . ? 
C6_25 N1_26 C1_26 121.5(8) . . ? 
C6_25 N1_26 H1_26 119.2 . . ? 
C1_26 N1_26 H1_26 119.2 . . ? 
N1_26 C1_26 C2_26 109.5(8) . . ? 
N1_26 C1_26 C5_26 112.8(10) . . ? 
C2_26 C1_26 C5_26 104.0(9) . . ? 
N1_26 C1_26 C6_26 109.0(8) . . ? 
C2_26 C1_26 C6_26 109.2(10) . . ? 
C5_26 C1_26 C6_26 112.2(9) . . ? 
C1_26 C2_26 C3_26 104.6(11) . . ? 
C1_26 C2_26 H2A_26 110.8 . . ? 
C3_26 C2_26 H2A_26 110.8 . . ? 
C1_26 C2_26 H2B_26 110.8 . . ? 
C3_26 C2_26 H2B_26 110.8 . . ? 
H2A_26 C2_26 H2B_26 108.9 . . ? 
O3_26 C3_26 C4_26 110.2(14) . . ? 
O3_26 C3_26 C2_26 111.2(14) . . ? 
C4_26 C3_26 C2_26 104.8(12) . . ? 
O3_26 C3_26 H3_26 110.2 . . ? 
C4_26 C3_26 H3_26 110.2 . . ? 
C2_26 C3_26 H3_26 110.2 . . ? 
C7_26 O3_26 C3_26 119.6(15) . . ? 
O3_26 C7_26 H7A_26 109.5 . . ? 
O3_26 C7_26 H7B_26 109.5 . . ? 
H7A_26 C7_26 H7B_26 109.5 . . ? 
O3_26 C7_26 H7C_26 109.5 . . ? 
H7A_26 C7_26 H7C_26 109.5 . . ? 
H7B_26 C7_26 H7C_26 109.5 . . ? 
C3_26 C4_26 C5_26 110.2(14) . . ? 
C3_26 C4_26 H4A_26 109.6 . . ? 
C5_26 C4_26 H4A_26 109.6 . . ? 
C3_26 C4_26 H4B_26 109.6 . . ? 
C5_26 C4_26 H4B_26 109.6 . . ? 
H4A_26 C4_26 H4B_26 108.1 . . ? 
C4_26 C5_26 C1_26 105.8(12) . . ? 
C4_26 C5_26 H5A_26 110.6 . . ? 
C1_26 C5_26 H5A_26 110.6 . . ? 
C4_26 C5_26 H5B_26 110.6 . . ? 
C1_26 C5_26 H5B_26 110.6 . . ? 
H5A_26 C5_26 H5B_26 108.7 . . ? 
O6_26 C6_26 N1_27 121.1(10) . . ? 
O6_26 C6_26 C1_26 122.5(10) . . ? 
N1_27 C6_26 C1_26 116.2(9) . . ? 
C6_26 N1_27 C1_27 120.6(8) . . ? 
C6_26 N1_27 H1_27 119.7 . . ? 
C1_27 N1_27 H1_27 119.7 . . ? 
N1_27 C1_27 C2_27 110.0(9) . . ? 
N1_27 C1_27 C6_27 111.7(9) . . ? 
C2_27 C1_27 C6_27 109.3(10) . . ? 
N1_27 C1_27 H1A_27 108.6 . . ? 
C2_27 C1_27 H1A_27 108.6 . . ? 
C6_27 C1_27 H1A_27 108.6 . . ? 
C3_27 C2_27 C1_27 114.2(11) . . ? 
C3_27 C2_27 H2A_27 108.7 . . ? 
C1_27 C2_27 H2A_27 108.7 . . ? 
C3_27 C2_27 H2B_27 108.7 . . ? 
C1_27 C2_27 H2B_27 108.7 . . ? 
H2A_27 C2_27 H2B_27 107.6 . . ? 
C4_27 C3_27 C2_27 110.4(15) . . ? 
C4_27 C3_27 C5_27 106.9(16) . . ? 
C2_27 C3_27 C5_27 107.2(15) . . ? 
C4_27 C3_27 H3_27 110.7 . . ? 
C2_27 C3_27 H3_27 110.7 . . ? 
C5_27 C3_27 H3_27 110.7 . . ? 
C3_27 C4_27 H4A_27 109.5 . . ? 
C3_27 C4_27 H4B_27 109.5 . . ? 
H4A_27 C4_27 H4B_27 109.5 . . ? 
C3_27 C4_27 H4C_27 109.5 . . ? 
H4A_27 C4_27 H4C_27 109.5 . . ? 
H4B_27 C4_27 H4C_27 109.5 . . ? 
C3_27 C5_27 H5A_27 109.5 . . ? 
C3_27 C5_27 H5B_27 109.5 . . ? 
H5A_27 C5_27 H5B_27 109.5 . . ? 
C3_27 C5_27 H5C_27 109.5 . . ? 
H5A_27 C5_27 H5C_27 109.5 . . ? 
H5B_27 C5_27 H5C_27 109.5 . . ? 
O6_27 C6_27 N1_28 123.2(10) . . ? 
O6_27 C6_27 C1_27 119.5(11) . . ? 
N1_28 C6_27 C1_27 117.1(9) . . ? 
C6_27 N1_28 C1_28 122.1(8) . . ? 
C6_27 N1_28 H1_28 119.0 . . ? 
C1_28 N1_28 H1_28 119.0 . . ? 
N1_28 C1_28 C6_28 111.9(8) . . ? 
N1_28 C1_28 C2_28 107.0(7) . . ? 
C6_28 C1_28 C2_28 111.8(9) . . ? 
N1_28 C1_28 H1A_28 108.7 . . ? 
C6_28 C1_28 H1A_28 108.7 . . ? 
C2_28 C1_28 H1A_28 108.7 . . ? 
C1_28 C2_28 C3_28 114.7(8) . . ? 
C1_28 C2_28 H2A_28 108.6 . . ? 
C3_28 C2_28 H2A_28 108.6 . . ? 
C1_28 C2_28 H2B_28 108.6 . . ? 
C3_28 C2_28 H2B_28 108.6 . . ? 
H2A_28 C2_28 H2B_28 107.6 . . ? 
C5_28 C3_28 C4_28 111.8(12) . . ? 
C5_28 C3_28 C2_28 110.6(10) . . ? 
C4_28 C3_28 C2_28 111.7(11) . . ? 
C5_28 C3_28 H3_28 107.5 . . ? 
C4_28 C3_28 H3_28 107.5 . . ? 
C2_28 C3_28 H3_28 107.5 . . ? 
C3_28 C4_28 H4A_28 109.5 . . ? 
C3_28 C4_28 H4B_28 109.5 . . ? 
H4A_28 C4_28 H4B_28 109.5 . . ? 
C3_28 C4_28 H4C_28 109.5 . . ? 
H4A_28 C4_28 H4C_28 109.5 . . ? 
H4B_28 C4_28 H4C_28 109.5 . . ? 
C3_28 C5_28 H5A_28 109.5 . . ? 
C3_28 C5_28 H5B_28 109.5 . . ? 
H5A_28 C5_28 H5B_28 109.5 . . ? 
C3_28 C5_28 H5C_28 109.5 . . ? 
H5A_28 C5_28 H5C_28 109.5 . . ? 
H5B_28 C5_28 H5C_28 109.5 . . ? 
O6_28 C6_28 N1_29 119.5(9) . . ? 
O6_28 C6_28 C1_28 123.0(8) . . ? 
N1_29 C6_28 C1_28 117.3(8) . . ? 
C6_28 N1_29 C1_29 122.8(8) . . ? 
C6_28 N1_29 H1_29 118.6 . . ? 
C1_29 N1_29 H1_29 118.6 . . ? 
N1_29 C1_29 C2_29 112.7(9) . . ? 
N1_29 C1_29 C6_29 109.0(9) . . ? 
C2_29 C1_29 C6_29 114.7(10) . . ? 
N1_29 C1_29 C5_29 108.8(8) . . ? 
C2_29 C1_29 C5_29 103.8(8) . . ? 
C6_29 C1_29 C5_29 107.5(9) . . ? 
C1_29 C2_29 C3_29 105.2(9) . . ? 
C1_29 C2_29 H2A_29 110.7 . . ? 
C3_29 C2_29 H2A_29 110.7 . . ? 
C1_29 C2_29 H2B_29 110.7 . . ? 
C3_29 C2_29 H2B_29 110.7 . . ? 
H2A_29 C2_29 H2B_29 108.8 . . ? 
O3_29 C3_29 C4_29 114.2(11) . . ? 
O3_29 C3_29 C2_29 115.5(11) . . ? 
C4_29 C3_29 C2_29 103.7(11) . . ? 
O3_29 C3_29 H3_29 107.7 . . ? 
C4_29 C3_29 H3_29 107.7 . . ? 
C2_29 C3_29 H3_29 107.7 . . ? 
C3_29 O3_29 C7_29 114.3(12) . . ? 
O3_29 C7_29 H7A_29 109.5 . . ? 
O3_29 C7_29 H7B_29 109.5 . . ? 
H7A_29 C7_29 H7B_29 109.5 . . ? 
O3_29 C7_29 H7C_29 109.5 . . ? 
H7A_29 C7_29 H7C_29 109.5 . . ? 
H7B_29 C7_29 H7C_29 109.5 . . ? 
C5_29 C4_29 C3_29 106.3(10) . . ? 
C5_29 C4_29 H4A_29 110.5 . . ? 
C3_29 C4_29 H4A_29 110.5 . . ? 
C5_29 C4_29 H4B_29 110.5 . . ? 
C3_29 C4_29 H4B_29 110.5 . . ? 
H4A_29 C4_29 H4B_29 108.7 . . ? 
C4_29 C5_29 C1_29 107.1(10) . . ? 
C4_29 C5_29 H5A_29 110.3 . . ? 
C1_29 C5_29 H5A_29 110.3 . . ? 
C4_29 C5_29 H5B_29 110.3 . . ? 
C1_29 C5_29 H5B_29 110.3 . . ? 
H5A_29 C5_29 H5B_29 108.5 . . ? 
O6_29 C6_29 O8_29 124.2(12) . . ? 
O6_29 C6_29 C1_29 123.4(14) . . ? 
O8_29 C6_29 C1_29 112.2(11) . . ? 
C6_29 O8_29 C8_29 115.8(11) . . ? 
O8_29 C8_29 H8A_29 109.5 . . ? 
O8_29 C8_29 H8B_29 109.5 . . ? 
H8A_29 C8_29 H8B_29 109.5 . . ? 
O8_29 C8_29 H8C_29 109.5 . . ? 
H8A_29 C8_29 H8C_29 109.5 . . ? 
H8B_29 C8_29 H8C_29 109.5 . . ? 
H1_31 O1_31 H2_31 101.8(8) . . ? 
H1_32 O1_32 H2_32 108.0(8) . . ? 
H1_33 O1_33 H2_33 122.7(11) . . ? 
H1_34 O1_34 H2_34 108.9(17) . . ? 
 
loop_ 
 _geom_torsion_atom_site_label_1 
 _geom_torsion_atom_site_label_2 
 _geom_torsion_atom_site_label_3 
 _geom_torsion_atom_site_label_4 
 _geom_torsion 
 _geom_torsion_site_symmetry_1 
 _geom_torsion_site_symmetry_2 
 _geom_torsion_site_symmetry_3 
 _geom_torsion_site_symmetry_4 
 _geom_torsion_publ_flag 
C3_10 C1_10 O1_10 C5_10 -175.9(9) . . . . ? 
C2_10 C1_10 O1_10 C5_10 67.3(12) . . . . ? 
C4_10 C1_10 O1_10 C5_10 -55.5(13) . . . . ? 
C1_10 O1_10 C5_10 O5_10 0.8(15) . . . . ? 
C1_10 O1_10 C5_10 N1_11 179(100) . . . . ? 
O5_10 C5_10 N1_11 C1_11 10.3(15) . . . . ? 
O1_10 C5_10 N1_11 C1_11 -168.3(7) . . . . ? 
C5_10 N1_11 C1_11 C6_11 -65.0(11) . . . . ? 
C5_10 N1_11 C1_11 C2_11 171.1(9) . . . . ? 
N1_11 C1_11 C2_11 C3_11 -175.6(9) . . . . ? 
C6_11 C1_11 C2_11 C3_11 58.7(12) . . . . ? 
C1_11 C2_11 C3_11 C4_11 58.4(13) . . . . ? 
C1_11 C2_11 C3_11 C5_11 -177.9(10) . . . . ? 
N1_11 C1_11 C6_11 O6_11 148.3(9) . . . . ? 
C2_11 C1_11 C6_11 O6_11 -87.3(11) . . . . ? 
N1_11 C1_11 C6_11 N1_12 -34.4(12) . . . . ? 
C2_11 C1_11 C6_11 N1_12 90.0(11) . . . . ? 
O6_11 C6_11 N1_12 C1_12 -0.7(14) . . . . ? 
C1_11 C6_11 N1_12 C1_12 -177.9(9) . . . . ? 
C6_11 N1_12 C1_12 C2_12 173.5(9) . . . . ? 
C6_11 N1_12 C1_12 C6_12 -59.3(12) . . . . ? 
N1_12 C1_12 C2_12 C3_12 -172.4(10) . . . . ? 
C6_12 C1_12 C2_12 C3_12 62.3(13) . . . . ? 
C1_12 C2_12 C3_12 C4_12 64.1(15) . . . . ? 
C1_12 C2_12 C3_12 C5_12 -170.4(11) . . . . ? 
N1_12 C1_12 C6_12 O6_12 132.4(10) . . . . ? 
C2_12 C1_12 C6_12 O6_12 -101.1(12) . . . . ? 
N1_12 C1_12 C6_12 N1_13 -50.0(11) . . . . ? 
C2_12 C1_12 C6_12 N1_13 76.6(11) . . . . ? 
O6_12 C6_12 N1_13 C1_13 -4.6(15) . . . . ? 
C1_12 C6_12 N1_13 C1_13 177.8(8) . . . . ? 
C6_12 N1_13 C1_13 C6_13 -54.3(12) . . . . ? 
C6_12 N1_13 C1_13 C2_13 180(100) . . . . ? 
C6_12 N1_13 C1_13 C5_13 70.4(12) . . . . ? 
N1_13 C1_13 C2_13 C3_13 -84.3(11) . . . . ? 
C6_13 C1_13 C2_13 C3_13 151.5(10) . . . . ? 
C5_13 C1_13 C2_13 C3_13 31.1(12) . . . . ? 
C1_13 C2_13 C3_13 C4_13 -13.7(16) . . . . ? 
C1_13 C2_13 C3_13 O3_13 -136.7(12) . . . . ? 
C2_13 C3_13 C4_13 C5_13 -10.2(17) . . . . ? 
O3_13 C3_13 C4_13 C5_13 104.3(15) . . . . ? 
C3_13 C4_13 C5_13 C1_13 28.8(16) . . . . ? 
N1_13 C1_13 C5_13 C4_13 80.3(12) . . . . ? 
C6_13 C1_13 C5_13 C4_13 -155.9(11) . . . . ? 
C2_13 C1_13 C5_13 C4_13 -34.4(12) . . . . ? 
C4_13 C3_13 O3_13 C7_13 80(2) . . . . ? 
C2_13 C3_13 O3_13 C7_13 -165(2) . . . . ? 
N1_13 C1_13 C6_13 O6_13 131.2(10) . . . . ? 
C2_13 C1_13 C6_13 O6_13 -105.7(12) . . . . ? 
C5_13 C1_13 C6_13 O6_13 7.9(15) . . . . ? 
N1_13 C1_13 C6_13 N1_14 -53.2(11) . . . . ? 
C2_13 C1_13 C6_13 N1_14 69.9(11) . . . . ? 
C5_13 C1_13 C6_13 N1_14 -176.5(9) . . . . ? 
O6_13 C6_13 N1_14 C1_14 2.3(14) . . . . ? 
C1_13 C6_13 N1_14 C1_14 -173.5(8) . . . . ? 
C6_13 N1_14 C1_14 C2_14 172.1(9) . . . . ? 
C6_13 N1_14 C1_14 C6_14 -65.0(11) . . . . ? 
N1_14 C1_14 C2_14 C3_14 -69.9(12) . . . . ? 
C6_14 C1_14 C2_14 C3_14 166.3(9) . . . . ? 
C1_14 C2_14 C3_14 C5_14 -65.7(16) . . . . ? 
C1_14 C2_14 C3_14 C4_14 171.8(11) . . . . ? 
N1_14 C1_14 C6_14 O6_14 138.6(9) . . . . ? 
C2_14 C1_14 C6_14 O6_14 -97.7(11) . . . . ? 
N1_14 C1_14 C6_14 N1_15 -44.2(12) . . . . ? 
C2_14 C1_14 C6_14 N1_15 79.6(11) . . . . ? 
O6_14 C6_14 N1_15 C1_15 -0.7(15) . . . . ? 
C1_14 C6_14 N1_15 C1_15 -177.9(8) . . . . ? 
C6_14 N1_15 C1_15 C2_15 163.5(10) . . . . ? 
C6_14 N1_15 C1_15 C6_15 -66.8(12) . . . . ? 
N1_15 C1_15 C2_15 C3_15 -160.4(12) . . . . ? 
C6_15 C1_15 C2_15 C3_15 72.9(15) . . . . ? 
C1_15 C2_15 C3_15 C4_15 -95.2(18) . . . . ? 
C1_15 C2_15 C3_15 C5_15 148.8(17) . . . . ? 
N1_15 C1_15 C6_15 O6_15 134.6(9) . . . . ? 
C2_15 C1_15 C6_15 O6_15 -98.6(12) . . . . ? 
N1_15 C1_15 C6_15 N1_16 -43.7(11) . . . . ? 
C2_15 C1_15 C6_15 N1_16 83.0(12) . . . . ? 
O6_15 C6_15 N1_16 C1_16 0.6(14) . . . . ? 
C1_15 C6_15 N1_16 C1_16 178.9(8) . . . . ? 
C6_15 N1_16 C1_16 C2_16 -177.9(9) . . . . ? 
C6_15 N1_16 C1_16 C6_16 -55.1(12) . . . . ? 
C6_15 N1_16 C1_16 C5_16 70.1(11) . . . . ? 
N1_16 C1_16 C2_16 C3_16 -81.0(10) . . . . ? 
C6_16 C1_16 C2_16 C3_16 157.9(9) . . . . ? 
C5_16 C1_16 C2_16 C3_16 36.5(11) . . . . ? 
C1_16 C2_16 C3_16 C4_16 -23.9(15) . . . . ? 
C1_16 C2_16 C3_16 O3_16 -146.1(10) . . . . ? 
C4_16 C3_16 O3_16 C7_16 71.6(16) . . . . ? 
C2_16 C3_16 O3_16 C7_16 -173.1(12) . . . . ? 
O3_16 C3_16 C4_16 C5_16 118.4(14) . . . . ? 
C2_16 C3_16 C4_16 C5_16 1.1(19) . . . . ? 
C3_16 C4_16 C5_16 C1_16 20.5(18) . . . . ? 
N1_16 C1_16 C5_16 C4_16 84.7(13) . . . . ? 
C2_16 C1_16 C5_16 C4_16 -32.9(13) . . . . ? 
C6_16 C1_16 C5_16 C4_16 -152.8(12) . . . . ? 
N1_16 C1_16 C6_16 O6_16 142.1(10) . . . . ? 
C2_16 C1_16 C6_16 O6_16 -95.6(12) . . . . ? 
C5_16 C1_16 C6_16 O6_16 18.7(15) . . . . ? 
N1_16 C1_16 C6_16 N1_17 -43.1(11) . . . . ? 
C2_16 C1_16 C6_16 N1_17 79.2(11) . . . . ? 
C5_16 C1_16 C6_16 N1_17 -166.5(9) . . . . ? 
O6_16 C6_16 N1_17 C1_17 0.9(15) . . . . ? 
C1_16 C6_16 N1_17 C1_17 -174.0(8) . . . . ? 
C6_16 N1_17 C1_17 C6_17 -72.9(11) . . . . ? 
C6_16 N1_17 C1_17 C2_17 166.1(8) . . . . ? 
N1_17 C1_17 C2_17 C3_17 176.0(8) . . . . ? 
C6_17 C1_17 C2_17 C3_17 53.4(11) . . . . ? 
C1_17 C2_17 C3_17 C4_17 -171.2(10) . . . . ? 
C1_17 C2_17 C3_17 C5_17 65.4(12) . . . . ? 
N1_17 C1_17 C6_17 O6_17 137.8(9) . . . . ? 
C2_17 C1_17 C6_17 O6_17 -102.7(10) . . . . ? 
N1_17 C1_17 C6_17 N1_18 -45.3(10) . . . . ? 
C2_17 C1_17 C6_17 N1_18 74.2(10) . . . . ? 
O6_17 C6_17 N1_18 C1_18 7.1(13) . . . . ? 
C1_17 C6_17 N1_18 C1_18 -169.8(8) . . . . ? 
C6_17 N1_18 C1_18 C6_18 -85.3(10) . . . . ? 
C6_17 N1_18 C1_18 C2_18 150.2(8) . . . . ? 
N1_18 C1_18 C2_18 C3_18 -86.4(11) . . . . ? 
C6_18 C1_18 C2_18 C3_18 146.9(9) . . . . ? 
C1_18 C2_18 C3_18 C5_18 60.9(14) . . . . ? 
C1_18 C2_18 C3_18 C4_18 -174.7(10) . . . . ? 
N1_18 C1_18 C6_18 O6_18 153.6(8) . . . . ? 
C2_18 C1_18 C6_18 O6_18 -80.6(10) . . . . ? 
N1_18 C1_18 C6_18 N1_19 -29.8(11) . . . . ? 
C2_18 C1_18 C6_18 N1_19 96.0(9) . . . . ? 
O6_18 C6_18 N1_19 C1_19 2.4(13) . . . . ? 
C1_18 C6_18 N1_19 C1_19 -174.1(8) . . . . ? 
C6_18 N1_19 C1_19 C6_19 51.8(11) . . . . ? 
C6_18 N1_19 C1_19 C2_19 -74.2(12) . . . . ? 
C6_18 N1_19 C1_19 C5_19 174.5(9) . . . . ? 
N1_19 C1_19 C2_19 C3_19 -83.9(12) . . . . ? 
C6_19 C1_19 C2_19 C3_19 150.9(10) . . . . ? 
C5_19 C1_19 C2_19 C3_19 32.1(12) . . . . ? 
C1_19 C2_19 C3_19 O3_19 -130.8(11) . . . . ? 
C1_19 C2_19 C3_19 C4_19 -11.1(13) . . . . ? 
C2_19 C3_19 O3_19 C7_19 -170.7(16) . . . . ? 
C4_19 C3_19 O3_19 C7_19 72.0(18) . . . . ? 
O3_19 C3_19 C4_19 C5_19 102.2(12) . . . . ? 
C2_19 C3_19 C4_19 C5_19 -15.3(13) . . . . ? 
C3_19 C4_19 C5_19 C1_19 35.0(11) . . . . ? 
N1_19 C1_19 C5_19 C4_19 77.0(10) . . . . ? 
C6_19 C1_19 C5_19 C4_19 -160.4(10) . . . . ? 
C2_19 C1_19 C5_19 C4_19 -40.8(10) . . . . ? 
N1_19 C1_19 C6_19 O6_19 -151.2(11) . . . . ? 
C2_19 C1_19 C6_19 O6_19 -25.7(15) . . . . ? 
C5_19 C1_19 C6_19 O6_19 87.2(13) . . . . ? 
N1_19 C1_19 C6_19 O8_19 32.2(12) . . . . ? 
C2_19 C1_19 C6_19 O8_19 157.8(9) . . . . ? 
C5_19 C1_19 C6_19 O8_19 -89.3(11) . . . . ? 
O6_19 C6_19 O8_19 C8_19 11.2(17) . . . . ? 
C1_19 C6_19 O8_19 C8_19 -172.4(10) . . . . ? 
C2_20 C1_20 O1_20 C5_20 66.0(12) . . . . ? 
C3_20 C1_20 O1_20 C5_20 -176.8(10) . . . . ? 
C4_20 C1_20 O1_20 C5_20 -57.1(13) . . . . ? 
C1_20 O1_20 C5_20 O5_20 -11.5(16) . . . . ? 
C1_20 O1_20 C5_20 N1_21 169.4(8) . . . . ? 
O5_20 C5_20 N1_21 C1_21 2.1(16) . . . . ? 
O1_20 C5_20 N1_21 C1_21 -178.8(8) . . . . ? 
C5_20 N1_21 C1_21 C6_21 -80.2(11) . . . . ? 
C5_20 N1_21 C1_21 C2_21 155.9(9) . . . . ? 
N1_21 C1_21 C2_21 C3_21 -178.5(8) . . . . ? 
C6_21 C1_21 C2_21 C3_21 55.2(12) . . . . ? 
C1_21 C2_21 C3_21 C5_21 60.3(13) . . . . ? 
C1_21 C2_21 C3_21 C4_21 -175.5(9) . . . . ? 
N1_21 C1_21 C6_21 O6_21 139.3(9) . . . . ? 
C2_21 C1_21 C6_21 O6_21 -96.9(11) . . . . ? 
N1_21 C1_21 C6_21 N1_22 -43.3(12) . . . . ? 
C2_21 C1_21 C6_21 N1_22 80.5(11) . . . . ? 
O6_21 C6_21 N1_22 C1_22 -1.8(15) . . . . ? 
C1_21 C6_21 N1_22 C1_22 -179.2(9) . . . . ? 
C6_21 N1_22 C1_22 C2_22 175.0(9) . . . . ? 
C6_21 N1_22 C1_22 C6_22 -56.2(12) . . . . ? 
N1_22 C1_22 C2_22 C3_22 -177.1(9) . . . . ? 
C6_22 C1_22 C2_22 C3_22 55.6(13) . . . . ? 
C1_22 C2_22 C3_22 C5_22 -175.2(12) . . . . ? 
C1_22 C2_22 C3_22 C4_22 62.5(14) . . . . ? 
N1_22 C1_22 C6_22 O6_22 136.7(9) . . . . ? 
C2_22 C1_22 C6_22 O6_22 -96.6(11) . . . . ? 
N1_22 C1_22 C6_22 N1_23 -41.5(11) . . . . ? 
C2_22 C1_22 C6_22 N1_23 85.2(11) . . . . ? 
O6_22 C6_22 N1_23 C1_23 1.5(14) . . . . ? 
C1_22 C6_22 N1_23 C1_23 179.6(7) . . . . ? 
C6_22 N1_23 C1_23 C5_23 73.1(11) . . . . ? 
C6_22 N1_23 C1_23 C2_23 -173.1(8) . . . . ? 
C6_22 N1_23 C1_23 C6_23 -54.0(11) . . . . ? 
N1_23 C1_23 C2_23 C3_23 -93.7(9) . . . . ? 
C5_23 C1_23 C2_23 C3_23 25.5(10) . . . . ? 
C6_23 C1_23 C2_23 C3_23 146.4(9) . . . . ? 
C1_23 C2_23 C3_23 O3_23 -122.4(9) . . . . ? 
C1_23 C2_23 C3_23 C4_23 -0.5(11) . . . . ? 
C2_23 C3_23 O3_23 C7_23 -169.1(12) . . . . ? 
C4_23 C3_23 O3_23 C7_23 74.0(14) . . . . ? 
O3_23 C3_23 C4_23 C5_23 91.5(11) . . . . ? 
C2_23 C3_23 C4_23 C5_23 -25.0(12) . . . . ? 
C3_23 C4_23 C5_23 C1_23 40.9(11) . . . . ? 
N1_23 C1_23 C5_23 C4_23 76.8(10) . . . . ? 
C2_23 C1_23 C5_23 C4_23 -41.0(10) . . . . ? 
C6_23 C1_23 C5_23 C4_23 -158.2(9) . . . . ? 
N1_23 C1_23 C6_23 O6_23 134.1(10) . . . . ? 
C5_23 C1_23 C6_23 O6_23 8.1(14) . . . . ? 
C2_23 C1_23 C6_23 O6_23 -106.0(11) . . . . ? 
N1_23 C1_23 C6_23 N1_24 -47.4(11) . . . . ? 
C5_23 C1_23 C6_23 N1_24 -173.5(8) . . . . ? 
C2_23 C1_23 C6_23 N1_24 72.4(10) . . . . ? 
O6_23 C6_23 N1_24 C1_24 -0.2(14) . . . . ? 
C1_23 C6_23 N1_24 C1_24 -178.6(8) . . . . ? 
C6_23 N1_24 C1_24 C6_24 -62.6(11) . . . . ? 
C6_23 N1_24 C1_24 C2_24 176.7(8) . . . . ? 
N1_24 C1_24 C2_24 C3_24 -178.2(9) . . . . ? 
C6_24 C1_24 C2_24 C3_24 60.2(12) . . . . ? 
C1_24 C2_24 C3_24 C5_24 61.5(15) . . . . ? 
C1_24 C2_24 C3_24 C4_24 -171.3(12) . . . . ? 
N1_24 C1_24 C6_24 O6_24 136.1(9) . . . . ? 
C2_24 C1_24 C6_24 O6_24 -103.5(10) . . . . ? 
N1_24 C1_24 C6_24 N1_25 -45.7(11) . . . . ? 
C2_24 C1_24 C6_24 N1_25 74.7(10) . . . . ? 
O6_24 C6_24 N1_25 C1_25 3.8(14) . . . . ? 
C1_24 C6_24 N1_25 C1_25 -174.4(8) . . . . ? 
C6_24 N1_25 C1_25 C2_25 162.8(9) . . . . ? 
C6_24 N1_25 C1_25 C6_25 -70.0(11) . . . . ? 
N1_25 C1_25 C2_25 C3_25 -58.0(13) . . . . ? 
C6_25 C1_25 C2_25 C3_25 175.4(10) . . . . ? 
C1_25 C2_25 C3_25 C4_25 -174.3(12) . . . . ? 
C1_25 C2_25 C3_25 C5_25 -48.7(17) . . . . ? 
N1_25 C1_25 C6_25 O6_25 145.9(9) . . . . ? 
C2_25 C1_25 C6_25 O6_25 -88.8(11) . . . . ? 
N1_25 C1_25 C6_25 N1_26 -34.7(12) . . . . ? 
C2_25 C1_25 C6_25 N1_26 90.6(11) . . . . ? 
O6_25 C6_25 N1_26 C1_26 -3.9(15) . . . . ? 
C1_25 C6_25 N1_26 C1_26 176.7(9) . . . . ? 
C6_25 N1_26 C1_26 C2_26 -175.6(9) . . . . ? 
C6_25 N1_26 C1_26 C5_26 69.1(12) . . . . ? 
C6_25 N1_26 C1_26 C6_26 -56.3(12) . . . . ? 
N1_26 C1_26 C2_26 C3_26 -89.0(11) . . . . ? 
C5_26 C1_26 C2_26 C3_26 31.8(12) . . . . ? 
C6_26 C1_26 C2_26 C3_26 151.8(9) . . . . ? 
C1_26 C2_26 C3_26 O3_26 -150.0(11) . . . . ? 
C1_26 C2_26 C3_26 C4_26 -30.9(15) . . . . ? 
C4_26 C3_26 O3_26 C7_26 111(2) . . . . ? 
C2_26 C3_26 O3_26 C7_26 -133(2) . . . . ? 
O3_26 C3_26 C4_26 C5_26 137.7(16) . . . . ? 
C2_26 C3_26 C4_26 C5_26 18(2) . . . . ? 
C3_26 C4_26 C5_26 C1_26 2(2) . . . . ? 
N1_26 C1_26 C5_26 C4_26 97.5(15) . . . . ? 
C2_26 C1_26 C5_26 C4_26 -21.1(16) . . . . ? 
C6_26 C1_26 C5_26 C4_26 -139.0(14) . . . . ? 
N1_26 C1_26 C6_26 O6_26 140.9(10) . . . . ? 
C2_26 C1_26 C6_26 O6_26 -99.6(12) . . . . ? 
C5_26 C1_26 C6_26 O6_26 15.2(15) . . . . ? 
N1_26 C1_26 C6_26 N1_27 -44.4(12) . . . . ? 
C2_26 C1_26 C6_26 N1_27 75.1(12) . . . . ? 
C5_26 C1_26 C6_26 N1_27 -170.1(10) . . . . ? 
O6_26 C6_26 N1_27 C1_27 -4.8(15) . . . . ? 
C1_26 C6_26 N1_27 C1_27 -179.5(9) . . . . ? 
C6_26 N1_27 C1_27 C2_27 166.1(10) . . . . ? 
C6_26 N1_27 C1_27 C6_27 -72.3(13) . . . . ? 
N1_27 C1_27 C2_27 C3_27 -72.5(14) . . . . ? 
C6_27 C1_27 C2_27 C3_27 164.5(12) . . . . ? 
C1_27 C2_27 C3_27 C4_27 -77.3(18) . . . . ? 
C1_27 C2_27 C3_27 C5_27 166.6(14) . . . . ? 
N1_27 C1_27 C6_27 O6_27 141.6(10) . . . . ? 
C2_27 C1_27 C6_27 O6_27 -96.5(13) . . . . ? 
N1_27 C1_27 C6_27 N1_28 -43.3(13) . . . . ? 
C2_27 C1_27 C6_27 N1_28 78.7(12) . . . . ? 
O6_27 C6_27 N1_28 C1_28 1.5(16) . . . . ? 
C1_27 C6_27 N1_28 C1_28 -173.5(9) . . . . ? 
C6_27 N1_28 C1_28 C6_28 -65.6(12) . . . . ? 
C6_27 N1_28 C1_28 C2_28 171.6(9) . . . . ? 
N1_28 C1_28 C2_28 C3_28 -179.9(9) . . . . ? 
C6_28 C1_28 C2_28 C3_28 57.3(12) . . . . ? 
C1_28 C2_28 C3_28 C5_28 -166.1(13) . . . . ? 
C1_28 C2_28 C3_28 C4_28 68.7(14) . . . . ? 
N1_28 C1_28 C6_28 O6_28 135.7(10) . . . . ? 
C2_28 C1_28 C6_28 O6_28 -104.2(11) . . . . ? 
N1_28 C1_28 C6_28 N1_29 -48.6(12) . . . . ? 
C2_28 C1_28 C6_28 N1_29 71.5(11) . . . . ? 
O6_28 C6_28 N1_29 C1_29 -3.3(15) . . . . ? 
C1_28 C6_28 N1_29 C1_29 -179.2(9) . . . . ? 
C6_28 N1_29 C1_29 C2_29 -76.8(11) . . . . ? 
C6_28 N1_29 C1_29 C6_29 51.6(13) . . . . ? 
C6_28 N1_29 C1_29 C5_29 168.6(9) . . . . ? 
N1_29 C1_29 C2_29 C3_29 -89.4(11) . . . . ? 
C6_29 C1_29 C2_29 C3_29 145.3(10) . . . . ? 
C5_29 C1_29 C2_29 C3_29 28.2(12) . . . . ? 
C1_29 C2_29 C3_29 O3_29 -163.6(11) . . . . ? 
C1_29 C2_29 C3_29 C4_29 -37.9(13) . . . . ? 
C4_29 C3_29 O3_29 C7_29 158.7(13) . . . . ? 
C2_29 C3_29 O3_29 C7_29 -81.2(16) . . . . ? 
O3_29 C3_29 C4_29 C5_29 158.9(12) . . . . ? 
C2_29 C3_29 C4_29 C5_29 32.3(14) . . . . ? 
C3_29 C4_29 C5_29 C1_29 -14.9(14) . . . . ? 
N1_29 C1_29 C5_29 C4_29 111.8(11) . . . . ? 
C2_29 C1_29 C5_29 C4_29 -8.4(12) . . . . ? 
C6_29 C1_29 C5_29 C4_29 -130.3(12) . . . . ? 
N1_29 C1_29 C6_29 O6_29 -137.6(11) . . . . ? 
C2_29 C1_29 C6_29 O6_29 -10.3(15) . . . . ? 
C5_29 C1_29 C6_29 O6_29 104.6(12) . . . . ? 
N1_29 C1_29 C6_29 O8_29 47.1(11) . . . . ? 
C2_29 C1_29 C6_29 O8_29 174.4(9) . . . . ? 
C5_29 C1_29 C6_29 O8_29 -70.7(11) . . . . ? 
O6_29 C6_29 O8_29 C8_29 0.2(17) . . . . ? 
C1_29 C6_29 O8_29 C8_29 175.5(10) . . . . ? 
 
_diffrn_measured_fraction_theta_max    0.999 
_diffrn_reflns_theta_full              20.82 
_diffrn_measured_fraction_theta_full   0.999 
_refine_diff_density_max    0.495 
_refine_diff_density_min   -0.397 
_refine_diff_density_rms    0.060 

#===END


 
data_dom2 
 
_audit_creation_method            SHELXL-97 
_chemical_name_systematic 
; 
 H2N-{L-Leu-L-Leu-[(S,S)-Ac5c(dOM)]}4-OMe 
; 
_chemical_name_common             ? 
_chemical_melting_point           121 
_chemical_formula_moiety          'C81 H144 N12 O21, C3 H7 N O' 
_chemical_formula_sum 
 'C84 H151 N13 O22' 
_chemical_formula_weight          1695.18 

_chemical_compound_source         synthesis
_chemical_absolute_configuration  rm 
 
loop_ 
 _atom_type_symbol 
 _atom_type_description 
 _atom_type_scat_dispersion_real 
 _atom_type_scat_dispersion_imag 
 _atom_type_scat_source 
 'C'  'C'   0.0033   0.0016 
 'International Tables Vol C Tables 4.2.6.8 and 6.1.1.4' 
 'N'  'N'   0.0061   0.0033 
 'International Tables Vol C Tables 4.2.6.8 and 6.1.1.4' 
 'O'  'O'   0.0106   0.0060 
 'International Tables Vol C Tables 4.2.6.8 and 6.1.1.4' 
 'H'  'H'   0.0000   0.0000 
 'International Tables Vol C Tables 4.2.6.8 and 6.1.1.4' 
 
_symmetry_cell_setting           'Triclinic'
_symmetry_space_group_name_H-M   'P1   '
 
loop_ 
 _symmetry_equiv_pos_as_xyz 
 'x, y, z' 
 
_cell_length_a                    11.2535(9) 
_cell_length_b                    11.6895(9) 
_cell_length_c                    19.1693(15) 
_cell_angle_alpha                 86.4600(10) 
_cell_angle_beta                  80.7790(10) 
_cell_angle_gamma                 87.4280(10) 
_cell_volume                      2482.8(3) 
_cell_formula_units_Z             1 
_cell_measurement_temperature     240(2) 
_cell_measurement_reflns_used    7661
_cell_measurement_theta_min        2.49
_cell_measurement_theta_max       25.72
 
_exptl_crystal_description        plate
_exptl_crystal_colour             colorless
_exptl_crystal_size_max           0.40 
_exptl_crystal_size_mid           0.35 
_exptl_crystal_size_min           0.20 
_exptl_crystal_density_meas       ? 
_exptl_crystal_density_diffrn     1.134 
_exptl_crystal_density_method     'not measured' 
_exptl_crystal_F_000              922 
_exptl_absorpt_coefficient_mu     0.082 
_exptl_absorpt_correction_type    empirical 
_exptl_absorpt_correction_T_min   0.520 
_exptl_absorpt_correction_T_max   1.0
_exptl_absorpt_process_details    'SADABS (Sheldrick, 1996)' 
 
_exptl_special_details 
; 
 ? 
; 
 
_diffrn_ambient_temperature       240(2) 
_diffrn_radiation_wavelength      0.71073 
_diffrn_radiation_type            MoK\a 
_diffrn_radiation_source          'MacScience M18XCE (rotating anode)'
_diffrn_radiation_monochromator   
                     'Bruker AXS Montel (conforcal multilayer optics)'
_diffrn_measurement_device_type   'Bruker AXS SMART APEX (CCD area detector)'
_diffrn_measurement_method        \w-scan
_diffrn_detector_area_resol_mean  8.366
_diffrn_standards_number          18 
_diffrn_standards_interval_count  20584 
_diffrn_standards_interval_time   420 
_diffrn_standards_decay_%         13.7 
_diffrn_reflns_number             20584 
_diffrn_reflns_av_R_equivalents   0.0403 
_diffrn_reflns_av_sigmaI/netI     0.0706 
_diffrn_reflns_limit_h_min        -14 
_diffrn_reflns_limit_h_max        13 
_diffrn_reflns_limit_k_min        -14 
_diffrn_reflns_limit_k_max        14 
_diffrn_reflns_limit_l_min        -24 
_diffrn_reflns_limit_l_max        24 
_diffrn_reflns_theta_min          1.75 
_diffrn_reflns_theta_max          26.73 
_reflns_number_total              10356 
_reflns_number_gt                 8843 
_reflns_threshold_expression      I>2\s(I) 
 
_computing_data_collection        'SMART (Bruker, 1998)'
_computing_cell_refinement        'SMART (Bruker, 1998)'
_computing_data_reduction         'SAINTPLUS (Bruker, 1998)' 
_computing_structure_solution     'SHELXS-97 (Sheldrick, 2008)' 
_computing_structure_refinement   'SHELXL-97 (Sheldrick, 2008)' 
_computing_molecular_graphics     'PLATON (Spek, 2003)' 
_computing_publication_material   ?  
 
_refine_special_details 
; 
 Refinement of F^2^ against ALL reflections.  The weighted R-factor wR and 
 goodness of fit S are based on F^2^, conventional R-factors R are based 
 on F, with F set to zero for negative F^2^. The threshold expression of 
 F^2^ > 2sigma(F^2^) is used only for calculating R-factors(gt) etc. and is 
 not relevant to the choice of reflections for refinement.  R-factors based 
 on F^2^ are statistically about twice as large as those based on F, and R- 
 factors based on ALL data will be even larger. 
; 
 
_refine_ls_structure_factor_coef  Fsqd  
_refine_ls_matrix_type            full 
_refine_ls_weighting_scheme       calc  
_refine_ls_weighting_details 
 'calc w=1/[\s^2^(Fo^2^)+(0.1385P)^2^+0.5692P] where P=(Fo^2^+2Fc^2^)/3' 
_atom_sites_solution_primary      direct 
_atom_sites_solution_secondary    difmap 
_atom_sites_solution_hydrogens    geom 
_refine_ls_hydrogen_treatment     constr 
_refine_ls_extinction_method      none 
_refine_ls_extinction_coef        ? 
_refine_ls_abs_structure_details  'Flack (1983), 0 Friedel pairs'
# 'Flack H D (1983), Acta Cryst. A39, 876-881' 
_refine_ls_abs_structure_Flack    -1.2(14) 
_refine_ls_number_reflns          10356 
_refine_ls_number_parameters      1176 
_refine_ls_number_restraints      1646 
_refine_ls_R_factor_all           0.0885 
_refine_ls_R_factor_gt            0.0793 
_refine_ls_wR_factor_ref          0.2311 
_refine_ls_wR_factor_gt           0.2193 
_refine_ls_goodness_of_fit_ref    1.094 
_refine_ls_restrained_S_all       1.216 
_refine_ls_shift/su_max           0.019 
_refine_ls_shift/su_mean          0.000 
 
loop_ 
 _atom_site_label 
 _atom_site_type_symbol 
 _atom_site_fract_x 
 _atom_site_fract_y 
 _atom_site_fract_z 
 _atom_site_U_iso_or_equiv 
 _atom_site_adp_type 
 _atom_site_occupancy 
 _atom_site_symmetry_multiplicity 
 _atom_site_calc_flag 
 _atom_site_refinement_flags 
 _atom_site_disorder_assembly 
 _atom_site_disorder_group 
NT_1 N 0.5585(8) 0.3357(7) 1.1493(4) 0.0868(19) Uani 1 1 d U . . 
H1_1 H 0.6337 0.3146 1.1467 0.113 Uiso 1 1 d . . . 
H2_1 H 0.5588 0.4066 1.1658 0.113 Uiso 1 1 d . . . 
CA_1 C 0.5250(6) 0.3469(7) 1.0805(4) 0.0649(13) Uani 1 1 d U . . 
HA_1 H 0.5294 0.2688 1.0629 0.078 Uiso 1 1 calc R . . 
C2_1 C 0.3944(8) 0.3963(9) 1.0768(6) 0.0902(19) Uani 1 1 d U . . 
H2A_1 H 0.3857 0.4704 1.0988 0.108 Uiso 1 1 calc R . . 
H2B_1 H 0.3873 0.4116 1.0268 0.108 Uiso 1 1 calc R . . 
C3_1 C 0.2910(11) 0.3263(12) 1.1100(8) 0.115(2) Uani 1 1 d U . . 
H3_1 H 0.2930 0.3147 1.1614 0.139 Uiso 1 1 calc R . . 
C4_1 C 0.1749(15) 0.3924(17) 1.0989(11) 0.156(4) Uani 1 1 d U . . 
H4A_1 H 0.1750 0.4683 1.1167 0.234 Uiso 1 1 calc R . . 
H4B_1 H 0.1064 0.3517 1.1241 0.234 Uiso 1 1 calc R . . 
H4C_1 H 0.1697 0.3993 1.0488 0.234 Uiso 1 1 calc R . . 
C5_1 C 0.2879(16) 0.2151(15) 1.0801(11) 0.150(4) Uani 1 1 d U . . 
H5A_1 H 0.2216 0.1725 1.1064 0.225 Uiso 1 1 calc R . . 
H5B_1 H 0.3631 0.1726 1.0829 0.225 Uiso 1 1 calc R . . 
H5C_1 H 0.2767 0.2263 1.0309 0.225 Uiso 1 1 calc R . . 
C_1 C 0.6097(5) 0.4186(6) 1.0272(3) 0.0561(12) Uani 1 1 d U . . 
O_1 O 0.6024(4) 0.4182(4) 0.9638(2) 0.0563(10) Uani 1 1 d U . . 
N_2 N 0.6888(5) 0.4783(5) 1.0518(3) 0.0617(11) Uani 1 1 d U . . 
H0_2 H 0.6953 0.4692 1.0965 0.074 Uiso 1 1 calc R . . 
CA_2 C 0.7655(6) 0.5587(7) 1.0069(3) 0.0623(12) Uani 1 1 d U . . 
HA_2 H 0.7153 0.6258 0.9937 0.075 Uiso 1 1 calc R . . 
C2_2 C 0.8598(7) 0.5997(8) 1.0496(4) 0.0778(16) Uani 1 1 d U . . 
H2A_2 H 0.8170 0.6338 1.0924 0.093 Uiso 1 1 calc R . . 
H2B_2 H 0.9067 0.5326 1.0647 0.093 Uiso 1 1 calc R . . 
C3_2 C 0.9460(9) 0.6861(9) 1.0102(5) 0.0888(19) Uani 1 1 d U . . 
H3_2 H 0.9906 0.6500 0.9678 0.107 Uiso 1 1 calc R . . 
C4_2 C 0.8835(14) 0.7925(13) 0.9859(8) 0.128(4) Uani 1 1 d U . . 
H4A_2 H 0.9426 0.8445 0.9607 0.191 Uiso 1 1 calc R . . 
H4B_2 H 0.8387 0.8292 1.0266 0.191 Uiso 1 1 calc R . . 
H4C_2 H 0.8285 0.7733 0.9547 0.191 Uiso 1 1 calc R . . 
C5_2 C 1.0374(10) 0.7140(11) 1.0571(6) 0.105(3) Uani 1 1 d U . . 
H5A_2 H 1.0767 0.6436 1.0727 0.158 Uiso 1 1 calc R . . 
H5B_2 H 0.9963 0.7525 1.0981 0.158 Uiso 1 1 calc R . . 
H5C_2 H 1.0973 0.7637 1.0304 0.158 Uiso 1 1 calc R . . 
C_2 C 0.8308(5) 0.5070(6) 0.9391(3) 0.0512(11) Uani 1 1 d U . . 
O_2 O 0.8387(4) 0.5636(4) 0.8828(2) 0.0542(9) Uani 1 1 d U . . 
N_3 N 0.8816(4) 0.4029(5) 0.9444(2) 0.0517(10) Uani 1 1 d U . . 
H0_3 H 0.8734 0.3646 0.9851 0.062 Uiso 1 1 calc R . . 
CA_3 C 0.9509(5) 0.3524(5) 0.8823(3) 0.0509(10) Uani 1 1 d U . . 
C2_3 C 1.0672(5) 0.4173(6) 0.8534(4) 0.0570(12) Uani 1 1 d U . . 
H2A_3 H 1.062(7) 0.454(7) 0.806(4) 0.068 Uiso 1 1 calc . . . 
H2B_3 H 1.080(7) 0.477(7) 0.885(4) 0.068 Uiso 1 1 calc . . . 
C3_3 C 1.1702(6) 0.3266(6) 0.8491(4) 0.0700(13) Uani 1 1 d U . . 
H3_3 H 1.2128 0.3308 0.8902 0.084 Uiso 1 1 calc R . . 
C4_3 C 1.1139(6) 0.2111(6) 0.8519(5) 0.0694(13) Uani 1 1 d U . . 
H4_3 H 1.0978 0.1942 0.8044 0.083 Uiso 1 1 calc R . . 
C5_3 C 0.9953(6) 0.2305(6) 0.9018(4) 0.0640(13) Uani 1 1 d U . . 
H5A_3 H 1.008(8) 0.224(7) 0.951(5) 0.077 Uiso 1 1 calc . . . 
H5B_3 H 0.937(8) 0.174(8) 0.895(4) 0.077 Uiso 1 1 calc . . . 
C_3 C 0.8701(5) 0.3476(4) 0.8239(3) 0.0446(10) Uani 1 1 d U . . 
O_3 O 0.9076(4) 0.3688(4) 0.7613(2) 0.0576(10) Uani 1 1 d U . . 
O3_3 O 1.2548(6) 0.3365(6) 0.7851(4) 0.1023(17) Uani 1 1 d U . . 
C3'_3 C 1.3187(10) 0.4350(11) 0.7785(7) 0.111(3) Uani 1 1 d U . . 
H3'1_3 H 1.3718 0.4384 0.7333 0.166 Uiso 1 1 calc R . . 
H3'2_3 H 1.3661 0.4351 0.8165 0.166 Uiso 1 1 calc R . . 
H3'3_3 H 1.2633 0.5012 0.7809 0.166 Uiso 1 1 calc R . . 
O4_3 O 1.1883(5) 0.1256(5) 0.8768(4) 0.0896(15) Uani 1 1 d U . . 
C4'_3 C 1.1517(12) 0.0163(10) 0.8714(8) 0.117(3) Uani 1 1 d U . . 
H4'1_3 H 1.2077 -0.0387 0.8898 0.176 Uiso 1 1 calc R . . 
H4'2_3 H 1.1496 0.0032 0.8222 0.176 Uiso 1 1 calc R . . 
H4'3_3 H 1.0719 0.0073 0.8986 0.176 Uiso 1 1 calc R . . 
N_4 N 0.7580(4) 0.3118(4) 0.8471(2) 0.0430(8) Uani 1 1 d U . . 
H0_4 H 0.7360 0.2929 0.8918 0.052 Uiso 1 1 calc R . . 
CA_4 C 0.6741(5) 0.3047(4) 0.7980(3) 0.0456(9) Uani 1 1 d U . . 
HA_4 H 0.7165 0.2639 0.7570 0.055 Uiso 1 1 calc R . . 
C2_4 C 0.5653(6) 0.2333(5) 0.8313(4) 0.0646(13) Uani 1 1 d DU B . 
H2A_4 H 0.5245 0.2724 0.8728 0.078 Uiso 1 1 calc R . . 
H2B_4 H 0.5091 0.2356 0.7971 0.078 Uiso 1 1 calc R . . 
C3_4 C 0.5852(9) 0.1137(8) 0.8536(6) 0.099(2) Uani 1 1 d DU . . 
H3_4 H 0.5696 0.0881 0.8077 0.119 Uiso 1 1 calc R A 1 
C4_4 C 0.4752(12) 0.0578(12) 0.8920(9) 0.134(4) Uani 1 1 d DU B . 
H4A_4 H 0.4965 -0.0192 0.9087 0.201 Uiso 1 1 calc R . . 
H4B_4 H 0.4166 0.0543 0.8603 0.201 Uiso 1 1 calc R . . 
H4C_4 H 0.4410 0.1020 0.9321 0.201 Uiso 1 1 calc R . . 
C5_4 C 0.6896(15) 0.0472(16) 0.8495(13) 0.110(4) Uani 0.55(2) 1 d PDU B 1 
H5A_4 H 0.6725 -0.0268 0.8740 0.165 Uiso 0.55(2) 1 calc PR B 1 
H5B_4 H 0.7479 0.0850 0.8715 0.165 Uiso 0.55(2) 1 calc PR B 1 
H5C_4 H 0.7221 0.0365 0.8003 0.165 Uiso 0.55(2) 1 calc PR B 1 
C5'_4 C 0.623(3) 0.0489(17) 0.7879(12) 0.114(5) Uani 0.45(2) 1 d PDU B 2 
H5'1_4 H 0.6371 -0.0315 0.8010 0.171 Uiso 0.45(2) 1 calc PR B 2 
H5'2_4 H 0.6966 0.0799 0.7616 0.171 Uiso 0.45(2) 1 calc PR B 2 
H5'3_4 H 0.5600 0.0564 0.7587 0.171 Uiso 0.45(2) 1 calc PR B 2 
C_4 C 0.6321(4) 0.4217(4) 0.7700(3) 0.0397(9) Uani 1 1 d U . . 
O_4 O 0.6187(4) 0.4383(3) 0.70818(19) 0.0495(8) Uani 1 1 d U . . 
N_5 N 0.6083(4) 0.5037(4) 0.8168(2) 0.0403(8) Uani 1 1 d U . . 
H0_5 H 0.6160 0.4882 0.8609 0.048 Uiso 1 1 calc R . . 
CA_5 C 0.5693(5) 0.6187(4) 0.7938(3) 0.0415(9) Uani 1 1 d U . . 
HA_5 H 0.4946 0.6130 0.7733 0.050 Uiso 1 1 calc R . . 
C2_5 C 0.5424(6) 0.6950(5) 0.8567(3) 0.0539(11) Uani 1 1 d U . . 
H2A_5 H 0.5282 0.7740 0.8388 0.065 Uiso 1 1 calc R . . 
H2B_5 H 0.6138 0.6940 0.8800 0.065 Uiso 1 1 calc R . . 
C3_5 C 0.4338(6) 0.6608(6) 0.9122(3) 0.0616(13) Uani 1 1 d U . . 
H3_5 H 0.4396 0.5770 0.9228 0.074 Uiso 1 1 calc R . . 
C4_5 C 0.3165(8) 0.6896(10) 0.8845(5) 0.094(2) Uani 1 1 d U . . 
H4A_5 H 0.3175 0.6529 0.8403 0.142 Uiso 1 1 calc R . . 
H4B_5 H 0.3073 0.7720 0.8764 0.142 Uiso 1 1 calc R . . 
H4C_5 H 0.2496 0.6622 0.9189 0.142 Uiso 1 1 calc R . . 
C5_5 C 0.4343(9) 0.7204(9) 0.9797(4) 0.088(2) Uani 1 1 d U . . 
H5A_5 H 0.5084 0.7000 0.9980 0.132 Uiso 1 1 calc R . . 
H5B_5 H 0.3660 0.6968 1.0144 0.132 Uiso 1 1 calc R . . 
H5C_5 H 0.4288 0.8028 0.9701 0.132 Uiso 1 1 calc R . . 
C_5 C 0.6659(4) 0.6724(4) 0.7367(2) 0.0381(9) Uani 1 1 d U . . 
O_5 O 0.6374(3) 0.7230(3) 0.68370(19) 0.0470(8) Uani 1 1 d U . . 
N_6 N 0.7788(4) 0.6613(4) 0.7495(2) 0.0404(8) Uani 1 1 d U . . 
H0_6 H 0.7930 0.6244 0.7883 0.049 Uiso 1 1 calc R . . 
CA_6 C 0.8791(4) 0.7088(4) 0.7008(3) 0.0400(8) Uani 1 1 d U . . 
C2_6 C 0.8745(5) 0.8427(4) 0.6929(3) 0.0453(10) Uani 1 1 d U . . 
H2A_6 H 0.874(6) 0.869(6) 0.643(4) 0.054 Uiso 1 1 calc . . . 
H2B_6 H 0.802(7) 0.874(6) 0.722(4) 0.054 Uiso 1 1 calc . . . 
C3_6 C 0.9889(6) 0.8798(5) 0.7181(3) 0.0551(11) Uani 1 1 d U . . 
H3_6 H 0.9728 0.8883 0.7698 0.066 Uiso 1 1 calc R . . 
C4_6 C 1.0764(5) 0.7794(6) 0.7015(3) 0.0553(11) Uani 1 1 d U . . 
H4_6 H 1.1025 0.7775 0.6497 0.066 Uiso 1 1 calc R . . 
C5_6 C 0.9993(5) 0.6789(5) 0.7280(3) 0.0462(10) Uani 1 1 d U . . 
H5A_6 H 0.987(6) 0.670(6) 0.780(4) 0.055 Uiso 1 1 calc . . . 
H5B_6 H 1.036(6) 0.608(6) 0.709(4) 0.055 Uiso 1 1 calc . . . 
C_6 C 0.8829(4) 0.6571(4) 0.6278(2) 0.0355(8) Uani 1 1 d U . . 
O_6 O 0.8945(4) 0.7142(3) 0.57190(18) 0.0472(8) Uani 1 1 d U . . 
O3_6 O 1.0358(5) 0.9824(4) 0.6834(3) 0.0742(12) Uani 1 1 d U . . 
C3'_6 C 0.9643(10) 1.0792(7) 0.7054(5) 0.088(2) Uani 1 1 d U . . 
H3'1_6 H 0.9997 1.1477 0.6811 0.132 Uiso 1 1 calc R . . 
H3'2_6 H 0.9599 1.0843 0.7561 0.132 Uiso 1 1 calc R . . 
H3'3_6 H 0.8839 1.0724 0.6944 0.132 Uiso 1 1 calc R . . 
O4_6 O 1.1787(4) 0.7765(5) 0.7367(3) 0.0746(12) Uani 1 1 d U . . 
C4'_6 C 1.2792(8) 0.8299(10) 0.6993(6) 0.096(2) Uani 1 1 d U . . 
H4'1_6 H 1.3447 0.8220 0.7267 0.144 Uiso 1 1 calc R . . 
H4'2_6 H 1.2596 0.9106 0.6904 0.144 Uiso 1 1 calc R . . 
H4'3_6 H 1.3033 0.7943 0.6545 0.144 Uiso 1 1 calc R . . 
N_7 N 0.8800(3) 0.5424(3) 0.6297(2) 0.0366(7) Uani 1 1 d U . . 
H0_7 H 0.8705 0.5030 0.6701 0.044 Uiso 1 1 calc R . . 
CA_7 C 0.8926(4) 0.4844(4) 0.5640(2) 0.0363(8) Uani 1 1 d U . . 
HA_7 H 0.9670 0.5111 0.5338 0.044 Uiso 1 1 calc R . . 
C2_7 C 0.9071(4) 0.3549(4) 0.5765(3) 0.0415(9) Uani 1 1 d U . . 
H2A_7 H 0.8373 0.3276 0.6097 0.050 Uiso 1 1 calc R . . 
H2B_7 H 0.9789 0.3377 0.5987 0.050 Uiso 1 1 calc R . . 
C3_7 C 0.9187(5) 0.2882(5) 0.5088(3) 0.0476(10) Uani 1 1 d U . . 
H3_7 H 0.8464 0.3078 0.4866 0.057 Uiso 1 1 calc R . . 
C4_7 C 0.9199(6) 0.1595(5) 0.5275(4) 0.0642(15) Uani 1 1 d U . . 
H4A_7 H 0.9247 0.1184 0.4847 0.096 Uiso 1 1 calc R . . 
H4B_7 H 0.8467 0.1403 0.5594 0.096 Uiso 1 1 calc R . . 
H4C_7 H 0.9891 0.1380 0.5504 0.096 Uiso 1 1 calc R . . 
C5_7 C 1.0274(6) 0.3210(6) 0.4558(4) 0.0622(15) Uani 1 1 d U . . 
H5A_7 H 1.0243 0.4031 0.4450 0.093 Uiso 1 1 calc R . . 
H5B_7 H 1.0277 0.2813 0.4128 0.093 Uiso 1 1 calc R . . 
H5C_7 H 1.1001 0.2996 0.4753 0.093 Uiso 1 1 calc R . . 
C_7 C 0.7873(4) 0.5163(4) 0.5242(2) 0.0342(8) Uani 1 1 d U . . 
O_7 O 0.8046(3) 0.5389(3) 0.46065(18) 0.0452(8) Uani 1 1 d U . . 
N_8 N 0.6762(3) 0.5156(3) 0.5628(2) 0.0348(7) Uani 1 1 d U . . 
H0_8 H 0.6663 0.5009 0.6084 0.042 Uiso 1 1 calc R . . 
CA_8 C 0.5727(4) 0.5399(4) 0.5264(2) 0.0358(8) Uani 1 1 d U . . 
HA_8 H 0.5762 0.4842 0.4892 0.043 Uiso 1 1 calc R . . 
C2_8 C 0.4562(4) 0.5232(5) 0.5777(3) 0.0465(10) Uani 1 1 d U . . 
H2A_8 H 0.4522 0.5775 0.6151 0.056 Uiso 1 1 calc R . . 
H2B_8 H 0.4584 0.4456 0.6002 0.056 Uiso 1 1 calc R . . 
C3_8 C 0.3420(5) 0.5393(7) 0.5445(4) 0.0656(14) Uani 1 1 d U . . 
H3_8 H 0.3388 0.6191 0.5240 0.079 Uiso 1 1 calc R . . 
C4_8 C 0.2329(7) 0.5248(10) 0.6023(6) 0.092(2) Uani 1 1 d U . . 
H4A_8 H 0.2379 0.5757 0.6397 0.138 Uiso 1 1 calc R . . 
H4B_8 H 0.2314 0.4460 0.6215 0.138 Uiso 1 1 calc R . . 
H4C_8 H 0.1598 0.5433 0.5825 0.138 Uiso 1 1 calc R . . 
C5_8 C 0.3419(9) 0.4599(10) 0.4855(6) 0.098(3) Uani 1 1 d U . . 
H5A_8 H 0.4120 0.4728 0.4497 0.147 Uiso 1 1 calc R . . 
H5B_8 H 0.2694 0.4748 0.4645 0.147 Uiso 1 1 calc R . . 
H5C_8 H 0.3441 0.3810 0.5043 0.147 Uiso 1 1 calc R . . 
C_8 C 0.5763(4) 0.6602(4) 0.4905(2) 0.0358(8) Uani 1 1 d U . . 
O_8 O 0.5462(3) 0.6797(3) 0.43206(18) 0.0430(7) Uani 1 1 d U . . 
N_9 N 0.6107(3) 0.7437(3) 0.5278(2) 0.0351(7) Uani 1 1 d U . . 
H0_9 H 0.6298 0.7269 0.5696 0.042 Uiso 1 1 calc R . . 
CA_9 C 0.6161(4) 0.8619(4) 0.4985(3) 0.0375(8) Uani 1 1 d U . . 
C2_9 C 0.4909(5) 0.9173(4) 0.4939(3) 0.0446(10) Uani 1 1 d U . . 
H2A_9 H 0.486(6) 0.946(6) 0.445(4) 0.054 Uiso 1 1 calc . . . 
H2B_9 H 0.428(6) 0.861(6) 0.509(3) 0.054 Uiso 1 1 calc . . . 
C3_9 C 0.4737(5) 1.0165(5) 0.5434(3) 0.0496(10) Uani 1 1 d U . . 
H3_9 H 0.4359 0.9879 0.5911 0.060 Uiso 1 1 calc R . . 
C4_9 C 0.6020(5) 1.0505(4) 0.5464(3) 0.0441(9) Uani 1 1 d U . . 
H4_9 H 0.6337 1.0961 0.5027 0.053 Uiso 1 1 calc R . . 
C5_9 C 0.6707(5) 0.9362(4) 0.5486(3) 0.0401(9) Uani 1 1 d U . . 
H5A_9 H 0.660(6) 0.901(6) 0.597(3) 0.048 Uiso 1 1 calc . . . 
H5B_9 H 0.757(6) 0.946(6) 0.532(3) 0.048 Uiso 1 1 calc . . . 
C_9 C 0.6979(5) 0.8657(4) 0.4257(3) 0.0430(9) Uani 1 1 d U . . 
O_9 O 0.6754(4) 0.9280(4) 0.3760(2) 0.0631(11) Uani 1 1 d U . . 
O3_9 O 0.4048(4) 1.1096(4) 0.5210(3) 0.0734(12) Uani 1 1 d U . . 
C3'_9 C 0.2809(9) 1.0954(9) 0.5379(8) 0.104(3) Uani 1 1 d U . . 
H3'1_9 H 0.2385 1.1631 0.5212 0.156 Uiso 1 1 calc R . . 
H3'2_9 H 0.2589 1.0843 0.5888 0.156 Uiso 1 1 calc R . . 
H3'3_9 H 0.2594 1.0289 0.5154 0.156 Uiso 1 1 calc R . . 
O4_9 O 0.6168(4) 1.1098(3) 0.6061(2) 0.0591(10) Uani 1 1 d U . . 
C4'_9 C 0.5726(8) 1.2240(6) 0.6049(5) 0.0771(19) Uani 1 1 d U . . 
H4'1_9 H 0.5869 1.2593 0.6471 0.116 Uiso 1 1 calc R . . 
H4'2_9 H 0.4867 1.2258 0.6034 0.116 Uiso 1 1 calc R . . 
H4'3_9 H 0.6135 1.2658 0.5633 0.116 Uiso 1 1 calc R . . 
N_10 N 0.7991(4) 0.7995(4) 0.4225(2) 0.0427(8) Uani 1 1 d U . . 
H0_10 H 0.8111 0.7560 0.4594 0.051 Uiso 1 1 calc R . . 
CA_10 C 0.8889(5) 0.7986(5) 0.3593(3) 0.0510(10) Uani 1 1 d U . . 
HA_10 H 0.8963 0.8788 0.3396 0.061 Uiso 1 1 calc R . . 
C2_10 C 1.0111(5) 0.7587(6) 0.3781(4) 0.0599(13) Uani 1 1 d U . . 
H2A_10 H 1.0684 0.7503 0.3344 0.072 Uiso 1 1 calc R . . 
H2B_10 H 1.0035 0.6831 0.4032 0.072 Uiso 1 1 calc R . . 
C3_10 C 1.0615(6) 0.8411(7) 0.4244(4) 0.0674(14) Uani 1 1 d U . . 
H3_10 H 1.0000 0.8547 0.4664 0.081 Uiso 1 1 calc R . . 
C4_10 C 1.0916(8) 0.9546(7) 0.3861(5) 0.082(2) Uani 1 1 d U . . 
H4A_10 H 1.0200 0.9897 0.3705 0.123 Uiso 1 1 calc R . . 
H4B_10 H 1.1534 0.9431 0.3454 0.123 Uiso 1 1 calc R . . 
H4C_10 H 1.1208 1.0044 0.4178 0.123 Uiso 1 1 calc R . . 
C5_10 C 1.1726(8) 0.7829(10) 0.4495(6) 0.094(2) Uani 1 1 d U . . 
H5A_10 H 1.1515 0.7091 0.4731 0.141 Uiso 1 1 calc R . . 
H5B_10 H 1.2018 0.8308 0.4822 0.141 Uiso 1 1 calc R . . 
H5C_10 H 1.2351 0.7717 0.4091 0.141 Uiso 1 1 calc R . . 
C_10 C 0.8548(6) 0.7268(5) 0.3009(3) 0.0576(12) Uani 1 1 d U . . 
O_10 O 0.8962(7) 0.7496(6) 0.2394(3) 0.0951(18) Uani 1 1 d U . . 
N_11 N 0.7814(4) 0.6414(4) 0.3214(2) 0.0519(10) Uani 1 1 d U . . 
H0_11 H 0.7581 0.6262 0.3663 0.062 Uiso 1 1 calc R . . 
CA_11 C 0.7388(6) 0.5723(5) 0.2701(3) 0.0560(11) Uani 1 1 d U . . 
HA_11 H 0.8075 0.5604 0.2317 0.067 Uiso 1 1 calc R . . 
C2_11 C 0.7028(8) 0.4543(6) 0.3022(4) 0.0714(14) Uani 1 1 d U . . 
H2A_11 H 0.6421 0.4645 0.3443 0.086 Uiso 1 1 calc R . . 
H2B_11 H 0.6642 0.4161 0.2680 0.086 Uiso 1 1 calc R . . 
C3_11 C 0.8024(9) 0.3750(7) 0.3231(4) 0.0813(17) Uani 1 1 d U . . 
H3_11 H 0.8343 0.4111 0.3613 0.098 Uiso 1 1 calc R . . 
C4_11 C 0.9064(13) 0.3600(11) 0.2636(7) 0.113(3) Uani 1 1 d U . . 
H4A_11 H 0.9364 0.4345 0.2460 0.169 Uiso 1 1 calc R . . 
H4B_11 H 0.8792 0.3222 0.2256 0.169 Uiso 1 1 calc R . . 
H4C_11 H 0.9702 0.3136 0.2810 0.169 Uiso 1 1 calc R . . 
C5_11 C 0.7509(14) 0.2630(10) 0.3542(7) 0.112(3) Uani 1 1 d U . . 
H5A_11 H 0.6856 0.2777 0.3926 0.168 Uiso 1 1 calc R . . 
H5B_11 H 0.8134 0.2154 0.3721 0.168 Uiso 1 1 calc R . . 
H5C_11 H 0.7206 0.2238 0.3179 0.168 Uiso 1 1 calc R . . 
C_11 C 0.6384(6) 0.6301(6) 0.2365(3) 0.0600(12) Uani 1 1 d U . . 
O_11 O 0.6135(5) 0.5940(5) 0.1814(2) 0.0678(12) Uani 1 1 d U . . 
N_12 N 0.5796(5) 0.7203(5) 0.2667(3) 0.0657(12) Uani 1 1 d U . . 
H0_12 H 0.5955 0.7406 0.3070 0.079 Uiso 1 1 calc R . . 
CA_12 C 0.4902(8) 0.7843(8) 0.2331(4) 0.0816(14) Uani 1 1 d U . . 
C2_12 C 0.4358(10) 0.8881(9) 0.2768(5) 0.0856(17) Uani 1 1 d U . . 
H2A_12 H 0.349(11) 0.897(10) 0.276(5) 0.103 Uiso 1 1 calc . . . 
H2B_12 H 0.449(10) 0.876(9) 0.326(6) 0.103 Uiso 1 1 calc . . . 
C3_12 C 0.4988(11) 0.9933(9) 0.2422(5) 0.0966(17) Uani 1 1 d U . . 
H3_12 H 0.5777 0.9971 0.2583 0.116 Uiso 1 1 calc R . . 
C4_12 C 0.5190(12) 0.9740(10) 0.1639(5) 0.1020(18) Uani 1 1 d U . . 
H4_12 H 0.4412 0.9880 0.1464 0.122 Uiso 1 1 calc R . . 
C5_12 C 0.5520(12) 0.8453(10) 0.1611(5) 0.0955(19) Uani 1 1 d U . . 
H5A_12 H 0.640(12) 0.833(11) 0.155(6) 0.115 Uiso 1 1 calc . . . 
H5B_12 H 0.523(11) 0.814(10) 0.121(7) 0.115 Uiso 1 1 calc . . . 
C_12 C 0.3888(10) 0.7132(11) 0.2204(6) 0.0995(19) Uani 1 1 d U . . 
O_12 O 0.3402(10) 0.7259(10) 0.1698(6) 0.144(3) Uani 1 1 d U . . 
O3_12 O 0.4341(9) 1.0981(7) 0.2535(4) 0.1108(18) Uani 1 1 d U . . 
C3'_12 C 0.4285(15) 1.1308(12) 0.3232(7) 0.122(3) Uani 1 1 d U . . 
H3'1_12 H 0.3809 1.2017 0.3294 0.183 Uiso 1 1 calc R . . 
H3'2_12 H 0.5092 1.1420 0.3325 0.183 Uiso 1 1 calc R . . 
H3'3_12 H 0.3913 1.0711 0.3559 0.183 Uiso 1 1 calc R . . 
O4_12 O 0.6025(9) 1.0478(8) 0.1249(4) 0.122(2) Uani 1 1 d U . . 
C4'_12 C 0.6220(17) 1.0318(14) 0.0508(7) 0.134(4) Uani 1 1 d U . . 
H4'1_12 H 0.6795 1.0864 0.0269 0.201 Uiso 1 1 calc R . . 
H4'2_12 H 0.5464 1.0438 0.0328 0.201 Uiso 1 1 calc R . . 
H4'3_12 H 0.6534 0.9544 0.0424 0.201 Uiso 1 1 calc R . . 
O7_12 O 0.3620(7) 0.6380(8) 0.2701(5) 0.1109(19) Uani 1 1 d U . . 
C7_12 C 0.2576(15) 0.5504(16) 0.2715(10) 0.148(4) Uani 1 1 d U . . 
H7A_12 H 0.2499 0.5030 0.3152 0.221 Uiso 1 1 calc R . . 
H7B_12 H 0.2769 0.5022 0.2316 0.221 Uiso 1 1 calc R . . 
H7C_12 H 0.1822 0.5927 0.2687 0.221 Uiso 1 1 calc R . . 
O1_20 O 0.8484(14) 0.2633(12) 1.0704(6) 0.113(4) Uani 0.541(10) 1 d PDU C 3 
C1_20 C 0.8376(19) 0.1850(15) 1.1124(10) 0.108(4) Uani 0.541(10) 1 d PDU C 3 
H1_20 H 0.7556 0.1864 1.1324 0.129 Uiso 0.541(10) 1 calc PR C 3 
N1_20 N 0.8876(15) 0.0954(13) 1.1447(8) 0.106(3) Uani 0.541(10) 1 d PDU C 3 
C2_20 C 0.836(2) 0.0443(18) 1.2108(9) 0.110(4) Uani 0.541(10) 1 d PDU C 3 
H21_20 H 0.8396 -0.0385 1.2085 0.164 Uiso 0.541(10) 1 calc PR C 3 
H22_20 H 0.7521 0.0707 1.2219 0.164 Uiso 0.541(10) 1 calc PR C 3 
H23_20 H 0.8795 0.0657 1.2474 0.164 Uiso 0.541(10) 1 calc PR C 3 
C3_20 C 0.9993(18) 0.042(2) 1.1101(13) 0.117(4) Uani 0.541(10) 1 d PDU C 3 
H31_20 H 1.0656 0.0917 1.1119 0.176 Uiso 0.541(10) 1 calc PR C 3 
H32_20 H 0.9931 0.0310 1.0611 0.176 Uiso 0.541(10) 1 calc PR C 3 
H33_20 H 1.0137 -0.0312 1.1342 0.176 Uiso 0.541(10) 1 calc PR C 3 
O1_21 O 0.9561(16) 0.0745(15) 1.0498(8) 0.109(4) Uani 0.459(10) 1 d PDU C 4 
C1_21 C 1.036(2) 0.020(2) 1.0769(9) 0.106(4) Uani 0.459(10) 1 d PDU C 4 
H1_21 H 1.1039 -0.0076 1.0465 0.127 Uiso 0.459(10) 1 calc PR C 4 
N1_21 N 1.0326(16) -0.0017(17) 1.1501(9) 0.105(3) Uani 0.459(10) 1 d PDU C 4 
C2_21 C 1.122(2) -0.075(2) 1.1759(12) 0.108(5) Uani 0.459(10) 1 d PDU C 4 
H21_21 H 1.1336 -0.0524 1.2220 0.162 Uiso 0.459(10) 1 calc PR C 4 
H22_21 H 1.1967 -0.0706 1.1433 0.162 Uiso 0.459(10) 1 calc PR C 4 
H23_21 H 1.0951 -0.1538 1.1802 0.162 Uiso 0.459(10) 1 calc PR C 4 
C3_21 C 0.922(2) 0.024(2) 1.1954(12) 0.111(4) Uani 0.459(10) 1 d PDU C 4 
H31_21 H 0.8587 -0.0223 1.1839 0.167 Uiso 0.459(10) 1 calc PR C 4 
H32_21 H 0.8995 0.1046 1.1886 0.167 Uiso 0.459(10) 1 calc PR C 4 
H33_21 H 0.9314 0.0071 1.2444 0.167 Uiso 0.459(10) 1 calc PR C 4 
 
loop_ 
 _atom_site_aniso_label 
 _atom_site_aniso_U_11 
 _atom_site_aniso_U_22 
 _atom_site_aniso_U_33 
 _atom_site_aniso_U_23 
 _atom_site_aniso_U_13 
 _atom_site_aniso_U_12 
NT_1 0.113(5) 0.084(4) 0.068(3) 0.013(3) -0.026(3) -0.030(3) 
CA_1 0.066(3) 0.071(3) 0.057(3) -0.005(2) -0.005(2) -0.014(2) 
C2_1 0.079(3) 0.092(4) 0.096(4) -0.005(3) -0.002(3) -0.013(3) 
C3_1 0.097(4) 0.118(5) 0.130(5) -0.004(4) -0.012(4) -0.016(4) 
C4_1 0.123(7) 0.163(8) 0.179(8) -0.009(7) -0.017(7) -0.007(7) 
C5_1 0.126(7) 0.143(7) 0.183(8) -0.009(7) -0.022(6) -0.022(6) 
C_1 0.054(2) 0.070(3) 0.045(2) -0.008(2) -0.004(2) -0.010(2) 
O_1 0.050(2) 0.079(3) 0.0414(19) -0.0057(17) -0.0074(15) -0.0144(18) 
N_2 0.056(2) 0.089(3) 0.041(2) -0.011(2) -0.0043(18) -0.021(2) 
CA_2 0.057(2) 0.086(3) 0.046(2) -0.016(2) -0.004(2) -0.020(2) 
C2_2 0.073(3) 0.102(4) 0.062(3) -0.025(3) -0.004(3) -0.030(3) 
C3_2 0.083(4) 0.108(4) 0.077(3) -0.026(3) -0.002(3) -0.037(3) 
C4_2 0.122(6) 0.127(7) 0.136(7) -0.011(6) -0.017(6) -0.040(6) 
C5_2 0.091(5) 0.123(6) 0.105(5) -0.035(5) -0.007(4) -0.042(5) 
C_2 0.045(2) 0.071(3) 0.040(2) -0.006(2) -0.0088(18) -0.015(2) 
O_2 0.056(2) 0.062(2) 0.0452(19) -0.0033(16) -0.0097(16) -0.0037(17) 
N_3 0.046(2) 0.069(2) 0.042(2) 0.0051(18) -0.0141(16) -0.0065(18) 
CA_3 0.043(2) 0.059(2) 0.051(2) 0.0074(19) -0.0113(17) -0.0029(18) 
C2_3 0.045(2) 0.061(3) 0.064(3) 0.006(2) -0.009(2) -0.006(2) 
C3_3 0.051(2) 0.071(3) 0.089(3) 0.000(3) -0.013(2) -0.006(2) 
C4_3 0.056(2) 0.064(3) 0.090(3) -0.001(2) -0.019(2) 0.001(2) 
C5_3 0.055(3) 0.067(3) 0.071(3) 0.012(2) -0.015(2) -0.001(2) 
C_3 0.041(2) 0.046(2) 0.046(2) -0.0022(18) -0.0061(17) 0.0004(17) 
O_3 0.053(2) 0.072(2) 0.046(2) -0.0011(18) -0.0040(16) -0.0011(18) 
O3_3 0.080(3) 0.091(3) 0.128(4) -0.009(3) 0.009(3) -0.008(3) 
C3'_3 0.078(5) 0.111(6) 0.137(6) 0.013(5) -0.005(5) -0.009(4) 
O4_3 0.071(3) 0.068(3) 0.130(4) 0.002(3) -0.023(3) 0.010(2) 
C4'_3 0.104(6) 0.085(5) 0.162(7) 0.001(5) -0.025(5) 0.006(5) 
N_4 0.0461(19) 0.0432(19) 0.0401(18) -0.0020(15) -0.0077(15) -0.0034(15) 
CA_4 0.048(2) 0.042(2) 0.049(2) -0.0060(17) -0.0121(18) -0.0054(17) 
C2_4 0.060(3) 0.053(3) 0.084(3) 0.001(2) -0.019(2) -0.015(2) 
C3_4 0.092(4) 0.082(3) 0.119(4) 0.009(3) -0.009(3) -0.010(3) 
C4_4 0.128(6) 0.116(6) 0.153(6) 0.011(5) -0.012(5) -0.014(5) 
C5_4 0.111(6) 0.096(6) 0.121(6) 0.002(5) -0.014(5) -0.003(5) 
C5'_4 0.114(7) 0.104(6) 0.118(7) 0.007(6) -0.005(6) -0.009(6) 
C_4 0.041(2) 0.0397(19) 0.039(2) -0.0043(16) -0.0066(16) -0.0081(16) 
O_4 0.065(2) 0.0470(19) 0.0389(17) -0.0042(14) -0.0118(15) -0.0122(16) 
N_5 0.0433(18) 0.0417(18) 0.0360(17) -0.0019(14) -0.0057(14) -0.0058(15) 
CA_5 0.0423(19) 0.0392(19) 0.042(2) -0.0034(16) -0.0021(16) -0.0032(16) 
C2_5 0.061(3) 0.046(2) 0.051(2) -0.005(2) 0.003(2) -0.002(2) 
C3_5 0.061(3) 0.062(3) 0.057(3) -0.004(2) 0.005(2) 0.006(2) 
C4_5 0.074(4) 0.116(6) 0.084(5) 0.000(4) 0.006(4) 0.020(4) 
C5_5 0.096(5) 0.096(5) 0.065(4) -0.021(4) 0.014(4) 0.003(4) 
C_5 0.041(2) 0.0346(18) 0.0389(19) -0.0087(16) -0.0056(16) -0.0026(15) 
O_5 0.0500(19) 0.0469(18) 0.0445(18) 0.0011(14) -0.0095(14) -0.0052(14) 
N_6 0.0439(18) 0.0426(18) 0.0359(17) -0.0041(14) -0.0079(15) -0.0046(15) 
CA_6 0.0426(19) 0.0395(18) 0.0393(18) -0.0011(15) -0.0093(15) -0.0087(15) 
C2_6 0.053(2) 0.039(2) 0.046(2) -0.0035(18) -0.0118(19) -0.0092(18) 
C3_6 0.064(2) 0.052(2) 0.054(2) -0.0011(19) -0.017(2) -0.024(2) 
C4_6 0.050(2) 0.066(2) 0.054(2) 0.006(2) -0.0197(19) -0.019(2) 
C5_6 0.045(2) 0.050(2) 0.047(2) -0.0001(19) -0.0149(18) -0.0090(19) 
C_6 0.0337(18) 0.0365(18) 0.0375(19) -0.0022(16) -0.0083(15) -0.0048(15) 
O_6 0.063(2) 0.0417(17) 0.0376(17) 0.0013(14) -0.0093(15) -0.0065(15) 
O3_6 0.086(3) 0.058(2) 0.085(3) 0.010(2) -0.027(2) -0.034(2) 
C3'_6 0.114(5) 0.059(4) 0.096(5) 0.001(3) -0.032(4) -0.023(4) 
O4_6 0.056(2) 0.094(3) 0.080(3) 0.012(2) -0.031(2) -0.029(2) 
C4'_6 0.067(4) 0.111(5) 0.114(5) 0.015(5) -0.027(4) -0.036(4) 
N_7 0.0374(17) 0.0372(17) 0.0370(17) -0.0029(14) -0.0097(14) -0.0047(13) 
CA_7 0.0333(17) 0.0372(18) 0.0392(18) -0.0043(15) -0.0068(15) -0.0024(14) 
C2_7 0.038(2) 0.043(2) 0.046(2) -0.0050(17) -0.0118(17) 0.0015(16) 
C3_7 0.041(2) 0.048(2) 0.056(2) -0.012(2) -0.0127(19) 0.0011(18) 
C4_7 0.063(3) 0.048(3) 0.084(4) -0.016(3) -0.015(3) 0.001(2) 
C5_7 0.057(3) 0.061(3) 0.068(3) -0.019(3) -0.004(3) 0.001(3) 
C_7 0.0360(18) 0.0298(17) 0.0382(19) -0.0058(15) -0.0093(15) -0.0002(14) 
O_7 0.0435(17) 0.0541(19) 0.0375(17) -0.0053(14) -0.0056(13) 0.0048(14) 
N_8 0.0336(16) 0.0336(16) 0.0389(17) -0.0050(13) -0.0097(13) -0.0031(13) 
CA_8 0.0339(18) 0.0326(18) 0.0433(19) -0.0061(15) -0.0109(15) -0.0059(14) 
C2_8 0.037(2) 0.045(2) 0.058(2) 0.0014(19) -0.0095(19) -0.0076(17) 
C3_8 0.038(2) 0.076(3) 0.084(3) 0.006(3) -0.016(2) -0.014(2) 
C4_8 0.044(3) 0.119(5) 0.112(5) 0.010(5) -0.012(3) -0.012(3) 
C5_8 0.072(4) 0.125(6) 0.106(5) -0.010(5) -0.031(4) -0.037(4) 
C_8 0.0338(18) 0.0339(18) 0.041(2) -0.0072(16) -0.0093(15) -0.0031(15) 
O_8 0.0474(18) 0.0418(17) 0.0434(17) -0.0035(13) -0.0169(14) -0.0069(13) 
N_9 0.0352(16) 0.0322(16) 0.0409(17) -0.0062(14) -0.0126(14) -0.0034(13) 
CA_9 0.0391(18) 0.0309(17) 0.0462(19) -0.0068(15) -0.0162(15) -0.0033(14) 
C2_9 0.043(2) 0.039(2) 0.056(2) -0.0061(19) -0.0199(19) 0.0000(17) 
C3_9 0.047(2) 0.0394(19) 0.065(2) -0.0100(19) -0.0152(19) 0.0018(17) 
C4_9 0.047(2) 0.0328(18) 0.056(2) -0.0113(17) -0.0155(18) -0.0023(16) 
C5_9 0.043(2) 0.0297(19) 0.053(2) -0.0087(17) -0.0202(18) -0.0028(16) 
C_9 0.046(2) 0.038(2) 0.047(2) -0.0035(17) -0.0123(17) -0.0063(17) 
O_9 0.068(3) 0.065(2) 0.056(2) 0.0132(19) -0.0176(19) 0.0054(19) 
O3_9 0.060(2) 0.054(2) 0.111(3) -0.013(2) -0.031(2) 0.0140(18) 
C3'_9 0.072(4) 0.090(5) 0.155(6) -0.009(5) -0.032(5) 0.008(4) 
O4_9 0.069(2) 0.0450(19) 0.068(2) -0.0209(17) -0.0205(18) -0.0023(16) 
C4'_9 0.087(4) 0.049(3) 0.102(5) -0.034(3) -0.025(4) 0.002(3) 
N_10 0.0411(18) 0.0411(18) 0.0462(19) -0.0019(15) -0.0065(15) -0.0077(15) 
CA_10 0.048(2) 0.052(2) 0.053(2) -0.0034(19) -0.0023(19) -0.0149(18) 
C2_10 0.046(2) 0.063(3) 0.069(3) -0.003(2) -0.003(2) -0.009(2) 
C3_10 0.046(3) 0.075(3) 0.083(3) -0.006(3) -0.010(2) -0.014(2) 
C4_10 0.075(4) 0.073(4) 0.098(5) -0.012(4) -0.010(4) -0.021(3) 
C5_10 0.056(3) 0.110(5) 0.120(6) -0.003(5) -0.027(4) -0.009(4) 
C_10 0.062(3) 0.058(3) 0.051(2) -0.006(2) 0.000(2) -0.012(2) 
O_10 0.126(4) 0.097(4) 0.057(3) -0.007(3) 0.015(3) -0.042(3) 
N_11 0.058(2) 0.058(2) 0.041(2) -0.0112(17) -0.0061(17) -0.0122(18) 
CA_11 0.065(2) 0.060(2) 0.046(2) -0.014(2) -0.011(2) -0.010(2) 
C2_11 0.090(3) 0.067(3) 0.062(3) -0.015(2) -0.020(3) -0.016(3) 
C3_11 0.112(4) 0.071(3) 0.070(3) -0.014(3) -0.034(3) -0.007(3) 
C4_11 0.128(6) 0.103(6) 0.109(6) -0.018(5) -0.027(5) 0.018(5) 
C5_11 0.148(7) 0.086(5) 0.112(6) -0.010(5) -0.048(5) -0.017(5) 
C_11 0.066(3) 0.070(3) 0.046(2) -0.016(2) -0.006(2) -0.008(2) 
O_11 0.078(3) 0.083(3) 0.047(2) -0.022(2) -0.020(2) 0.007(2) 
N_12 0.068(3) 0.082(3) 0.050(2) -0.022(2) -0.014(2) 0.004(2) 
CA_12 0.089(3) 0.096(3) 0.064(3) -0.025(2) -0.022(2) 0.019(3) 
C2_12 0.098(4) 0.094(3) 0.066(3) -0.022(3) -0.021(3) 0.027(3) 
C3_12 0.121(4) 0.097(3) 0.074(3) -0.016(3) -0.028(3) 0.028(3) 
C4_12 0.126(4) 0.105(3) 0.076(3) -0.012(3) -0.026(3) 0.025(3) 
C5_12 0.113(4) 0.102(4) 0.071(3) -0.014(3) -0.018(3) 0.027(3) 
C_12 0.095(3) 0.115(4) 0.095(3) -0.037(3) -0.028(3) 0.008(3) 
O_12 0.132(5) 0.176(6) 0.139(5) -0.035(5) -0.062(4) 0.008(5) 
O3_12 0.147(4) 0.101(4) 0.085(3) -0.016(3) -0.027(3) 0.035(3) 
C3'_12 0.153(7) 0.108(6) 0.108(6) -0.025(5) -0.023(6) 0.015(6) 
O4_12 0.155(5) 0.120(4) 0.090(4) -0.004(3) -0.020(3) 0.014(4) 
C4'_12 0.167(7) 0.126(7) 0.106(6) -0.002(5) -0.017(6) 0.016(6) 
O7_12 0.094(3) 0.123(4) 0.121(4) -0.047(3) -0.016(3) -0.012(3) 
C7_12 0.126(6) 0.158(7) 0.166(7) -0.052(6) -0.023(5) -0.013(5) 
O1_20 0.137(7) 0.127(7) 0.071(5) 0.059(5) -0.017(5) -0.024(6) 
C1_20 0.121(6) 0.102(6) 0.098(6) 0.012(5) -0.016(5) -0.011(5) 
N1_20 0.118(5) 0.098(5) 0.101(5) 0.008(4) -0.017(5) -0.011(5) 
C2_20 0.120(7) 0.101(7) 0.107(7) 0.013(6) -0.019(6) -0.008(6) 
C3_20 0.121(6) 0.111(6) 0.118(6) 0.002(5) -0.017(5) -0.003(5) 
O1_21 0.114(6) 0.102(6) 0.107(6) 0.007(5) -0.018(5) 0.008(5) 
C1_21 0.109(5) 0.103(5) 0.104(5) 0.000(5) -0.016(5) -0.001(5) 
N1_21 0.108(5) 0.103(5) 0.105(5) 0.002(4) -0.020(4) -0.003(4) 
C2_21 0.108(7) 0.116(8) 0.105(7) -0.006(6) -0.031(6) -0.008(6) 
C3_21 0.116(6) 0.107(6) 0.107(6) 0.008(5) -0.013(5) -0.001(5) 
 
_geom_special_details 
; 
 All esds (except the esd in the dihedral angle between two l.s. planes) 
 are estimated using the full covariance matrix.  The cell esds are taken 
 into account individually in the estimation of esds in distances, angles 
 and torsion angles; correlations between esds in cell parameters are only 
 used when they are defined by crystal symmetry.  An approximate (isotropic) 
 treatment of cell esds is used for estimating esds involving l.s. planes. 
; 
 
loop_ 
 _geom_bond_atom_site_label_1 
 _geom_bond_atom_site_label_2 
 _geom_bond_distance 
 _geom_bond_site_symmetry_2 
 _geom_bond_publ_flag 
NT_1 CA_1 1.426(10) . ? 
NT_1 H1_1 0.864(9) . ? 
NT_1 H2_1 0.905(8) . ? 
CA_1 C_1 1.520(9) . ? 
CA_1 C2_1 1.566(13) . ? 
CA_1 HA_1 0.9900 . ? 
C2_1 C3_1 1.487(15) . ? 
C2_1 H2A_1 0.9800 . ? 
C2_1 H2B_1 0.9800 . ? 
C3_1 C5_1 1.46(2) . ? 
C3_1 C4_1 1.53(2) . ? 
C3_1 H3_1 0.9900 . ? 
C4_1 H4A_1 0.9700 . ? 
C4_1 H4B_1 0.9700 . ? 
C4_1 H4C_1 0.9700 . ? 
C5_1 H5A_1 0.9700 . ? 
C5_1 H5B_1 0.9700 . ? 
C5_1 H5C_1 0.9700 . ? 
C_1 O_1 1.231(7) . ? 
C_1 N_2 1.317(8) . ? 
N_2 CA_2 1.451(8) . ? 
N_2 H0_2 0.8700 . ? 
CA_2 C_2 1.531(8) . ? 
CA_2 C2_2 1.549(9) . ? 
CA_2 HA_2 0.9900 . ? 
C2_2 C3_2 1.514(12) . ? 
C2_2 H2A_2 0.9800 . ? 
C2_2 H2B_2 0.9800 . ? 
C3_2 C4_2 1.488(19) . ? 
C3_2 C5_2 1.529(13) . ? 
C3_2 H3_2 0.9900 . ? 
C4_2 H4A_2 0.9700 . ? 
C4_2 H4B_2 0.9700 . ? 
C4_2 H4C_2 0.9700 . ? 
C5_2 H5A_2 0.9700 . ? 
C5_2 H5B_2 0.9700 . ? 
C5_2 H5C_2 0.9700 . ? 
C_2 O_2 1.225(7) . ? 
C_2 N_3 1.326(8) . ? 
N_3 CA_3 1.455(8) . ? 
N_3 H0_3 0.8700 . ? 
CA_3 C5_3 1.533(9) . ? 
CA_3 C2_3 1.549(8) . ? 
CA_3 C_3 1.557(8) . ? 
C2_3 C3_3 1.531(10) . ? 
C2_3 H2A_3 0.98(8) . ? 
C2_3 H2B_3 0.98(9) . ? 
C3_3 O3_3 1.429(10) . ? 
C3_3 C4_3 1.511(10) . ? 
C3_3 H3_3 0.9900 . ? 
C4_3 O4_3 1.386(9) . ? 
C4_3 C5_3 1.529(10) . ? 
C4_3 H4_3 0.9900 . ? 
C5_3 H5A_3 0.98(9) . ? 
C5_3 H5B_3 0.98(9) . ? 
C_3 O_3 1.220(7) . ? 
C_3 N_4 1.344(7) . ? 
O3_3 C3'_3 1.373(14) . ? 
C3'_3 H3'1_3 0.9700 . ? 
C3'_3 H3'2_3 0.9700 . ? 
C3'_3 H3'3_3 0.9700 . ? 
O4_3 C4'_3 1.374(14) . ? 
C4'_3 H4'1_3 0.9700 . ? 
C4'_3 H4'2_3 0.9700 . ? 
C4'_3 H4'3_3 0.9700 . ? 
N_4 CA_4 1.445(7) . ? 
N_4 H0_4 0.8700 . ? 
CA_4 C_4 1.521(7) . ? 
CA_4 C2_4 1.542(8) . ? 
CA_4 HA_4 0.9900 . ? 
C2_4 C3_4 1.454(12) . ? 
C2_4 H2A_4 0.9800 . ? 
C2_4 H2B_4 0.9800 . ? 
C3_4 C5_4 1.374(15) . ? 
C3_4 C4_4 1.491(13) . ? 
C3_4 C5'_4 1.503(17) . ? 
C3_4 H3_4 0.9900 . ? 
C4_4 H4A_4 0.9700 . ? 
C4_4 H4B_4 0.9700 . ? 
C4_4 H4C_4 0.9700 . ? 
C5_4 H5A_4 0.9700 . ? 
C5_4 H5B_4 0.9700 . ? 
C5_4 H5C_4 0.9700 . ? 
C5'_4 H5'1_4 0.9700 . ? 
C5'_4 H5'2_4 0.9700 . ? 
C5'_4 H5'3_4 0.9700 . ? 
C_4 O_4 1.221(6) . ? 
C_4 N_5 1.342(6) . ? 
N_5 CA_5 1.460(6) . ? 
N_5 H0_5 0.8700 . ? 
CA_5 C2_5 1.528(7) . ? 
CA_5 C_5 1.539(7) . ? 
CA_5 HA_5 0.9900 . ? 
C2_5 C3_5 1.537(8) . ? 
C2_5 H2A_5 0.9800 . ? 
C2_5 H2B_5 0.9800 . ? 
C3_5 C5_5 1.508(11) . ? 
C3_5 C4_5 1.517(12) . ? 
C3_5 H3_5 0.9900 . ? 
C4_5 H4A_5 0.9700 . ? 
C4_5 H4B_5 0.9700 . ? 
C4_5 H4C_5 0.9700 . ? 
C5_5 H5A_5 0.9700 . ? 
C5_5 H5B_5 0.9700 . ? 
C5_5 H5C_5 0.9700 . ? 
C_5 O_5 1.224(6) . ? 
C_5 N_6 1.332(6) . ? 
N_6 CA_6 1.452(6) . ? 
N_6 H0_6 0.8700 . ? 
CA_6 C5_6 1.544(7) . ? 
CA_6 C_6 1.552(6) . ? 
CA_6 C2_6 1.563(7) . ? 
C2_6 C3_6 1.535(8) . ? 
C2_6 H2A_6 0.98(7) . ? 
C2_6 H2B_6 0.98(7) . ? 
C3_6 O3_6 1.416(7) . ? 
C3_6 C4_6 1.513(10) . ? 
C3_6 H3_6 0.9900 . ? 
C4_6 O4_6 1.422(7) . ? 
C4_6 C5_6 1.506(7) . ? 
C4_6 H4_6 0.9900 . ? 
C5_6 H5A_6 0.98(7) . ? 
C5_6 H5B_6 0.98(7) . ? 
C_6 O_6 1.219(6) . ? 
C_6 N_7 1.340(6) . ? 
O3_6 C3'_6 1.405(12) . ? 
C3'_6 H3'1_6 0.9700 . ? 
C3'_6 H3'2_6 0.9700 . ? 
C3'_6 H3'3_6 0.9700 . ? 
O4_6 C4'_6 1.390(10) . ? 
C4'_6 H4'1_6 0.9700 . ? 
C4'_6 H4'2_6 0.9700 . ? 
C4'_6 H4'3_6 0.9700 . ? 
N_7 CA_7 1.450(6) . ? 
N_7 H0_7 0.8700 . ? 
CA_7 C2_7 1.524(7) . ? 
CA_7 C_7 1.530(6) . ? 
CA_7 HA_7 0.9900 . ? 
C2_7 C3_7 1.538(7) . ? 
C2_7 H2A_7 0.9800 . ? 
C2_7 H2B_7 0.9800 . ? 
C3_7 C5_7 1.507(9) . ? 
C3_7 C4_7 1.525(9) . ? 
C3_7 H3_7 0.9900 . ? 
C4_7 H4A_7 0.9700 . ? 
C4_7 H4B_7 0.9700 . ? 
C4_7 H4C_7 0.9700 . ? 
C5_7 H5A_7 0.9700 . ? 
C5_7 H5B_7 0.9700 . ? 
C5_7 H5C_7 0.9700 . ? 
C_7 O_7 1.217(6) . ? 
C_7 N_8 1.347(6) . ? 
N_8 CA_8 1.459(6) . ? 
N_8 H0_8 0.8700 . ? 
CA_8 C2_8 1.519(7) . ? 
CA_8 C_8 1.526(6) . ? 
CA_8 HA_8 0.9900 . ? 
C2_8 C3_8 1.523(8) . ? 
C2_8 H2A_8 0.9800 . ? 
C2_8 H2B_8 0.9800 . ? 
C3_8 C5_8 1.506(13) . ? 
C3_8 C4_8 1.526(11) . ? 
C3_8 H3_8 0.9900 . ? 
C4_8 H4A_8 0.9700 . ? 
C4_8 H4B_8 0.9700 . ? 
C4_8 H4C_8 0.9700 . ? 
C5_8 H5A_8 0.9700 . ? 
C5_8 H5B_8 0.9700 . ? 
C5_8 H5C_8 0.9700 . ? 
C_8 O_8 1.227(6) . ? 
C_8 N_9 1.350(6) . ? 
N_9 CA_9 1.460(6) . ? 
N_9 H0_9 0.8700 . ? 
CA_9 C2_9 1.536(7) . ? 
CA_9 C_9 1.543(7) . ? 
CA_9 C5_9 1.547(6) . ? 
C2_9 C3_9 1.530(7) . ? 
C2_9 H2A_9 0.98(7) . ? 
C2_9 H2B_9 0.98(7) . ? 
C3_9 O3_9 1.394(7) . ? 
C3_9 C4_9 1.526(7) . ? 
C3_9 H3_9 0.9900 . ? 
C4_9 O4_9 1.409(6) . ? 
C4_9 C5_9 1.515(7) . ? 
C4_9 H4_9 0.9900 . ? 
C5_9 H5A_9 0.98(7) . ? 
C5_9 H5B_9 0.98(7) . ? 
C_9 O_9 1.216(7) . ? 
C_9 N_10 1.343(7) . ? 
O3_9 C3'_9 1.395(11) . ? 
C3'_9 H3'1_9 0.9700 . ? 
C3'_9 H3'2_9 0.9700 . ? 
C3'_9 H3'3_9 0.9700 . ? 
O4_9 C4'_9 1.403(8) . ? 
C4'_9 H4'1_9 0.9700 . ? 
C4'_9 H4'2_9 0.9700 . ? 
C4'_9 H4'3_9 0.9700 . ? 
N_10 CA_10 1.449(7) . ? 
N_10 H0_10 0.8700 . ? 
CA_10 C2_10 1.523(9) . ? 
CA_10 C_10 1.545(8) . ? 
CA_10 HA_10 0.9900 . ? 
C2_10 C3_10 1.533(10) . ? 
C2_10 H2A_10 0.9800 . ? 
C2_10 H2B_10 0.9800 . ? 
C3_10 C4_10 1.501(11) . ? 
C3_10 C5_10 1.528(12) . ? 
C3_10 H3_10 0.9900 . ? 
C4_10 H4A_10 0.9700 . ? 
C4_10 H4B_10 0.9700 . ? 
C4_10 H4C_10 0.9700 . ? 
C5_10 H5A_10 0.9700 . ? 
C5_10 H5B_10 0.9700 . ? 
C5_10 H5C_10 0.9700 . ? 
C_10 O_10 1.213(8) . ? 
C_10 N_11 1.324(8) . ? 
N_11 CA_11 1.460(7) . ? 
N_11 H0_11 0.8700 . ? 
CA_11 C_11 1.503(10) . ? 
CA_11 C2_11 1.520(10) . ? 
CA_11 HA_11 0.9900 . ? 
C2_11 C3_11 1.510(13) . ? 
C2_11 H2A_11 0.9800 . ? 
C2_11 H2B_11 0.9800 . ? 
C3_11 C5_11 1.505(15) . ? 
C3_11 C4_11 1.510(16) . ? 
C3_11 H3_11 0.9900 . ? 
C4_11 H4A_11 0.9700 . ? 
C4_11 H4B_11 0.9700 . ? 
C4_11 H4C_11 0.9700 . ? 
C5_11 H5A_11 0.9700 . ? 
C5_11 H5B_11 0.9700 . ? 
C5_11 H5C_11 0.9700 . ? 
C_11 O_11 1.237(7) . ? 
C_11 N_12 1.332(9) . ? 
N_12 CA_12 1.438(10) . ? 
N_12 H0_12 0.8700 . ? 
CA_12 C_12 1.500(15) . ? 
CA_12 C2_12 1.563(12) . ? 
CA_12 C5_12 1.585(15) . ? 
C2_12 C3_12 1.510(16) . ? 
C2_12 H2A_12 0.98(12) . ? 
C2_12 H2B_12 0.98(11) . ? 
C3_12 O3_12 1.407(12) . ? 
C3_12 C4_12 1.511(13) . ? 
C3_12 H3_12 0.9900 . ? 
C4_12 O4_12 1.397(15) . ? 
C4_12 C5_12 1.535(15) . ? 
C4_12 H4_12 0.9900 . ? 
C5_12 H5A_12 0.98(13) . ? 
C5_12 H5B_12 0.98(13) . ? 
C_12 O_12 1.186(13) . ? 
C_12 O7_12 1.264(14) . ? 
O3_12 C3'_12 1.404(14) . ? 
C3'_12 H3'1_12 0.9700 . ? 
C3'_12 H3'2_12 0.9700 . ? 
C3'_12 H3'3_12 0.9700 . ? 
O4_12 C4'_12 1.424(16) . ? 
C4'_12 H4'1_12 0.9700 . ? 
C4'_12 H4'2_12 0.9700 . ? 
C4'_12 H4'3_12 0.9700 . ? 
O7_12 C7_12 1.588(18) . ? 
C7_12 H7A_12 0.9700 . ? 
C7_12 H7B_12 0.9700 . ? 
C7_12 H7C_12 0.9700 . ? 
O1_20 C1_20 1.178(14) . ? 
C1_20 N1_20 1.333(15) . ? 
C1_20 H1_20 0.9400 . ? 
N1_20 C2_20 1.416(16) . ? 
N1_20 C3_20 1.457(17) . ? 
C2_20 H21_20 0.9700 . ? 
C2_20 H22_20 0.9700 . ? 
C2_20 H23_20 0.9700 . ? 
C3_20 H31_20 0.9700 . ? 
C3_20 H32_20 0.9700 . ? 
C3_20 H33_20 0.9700 . ? 
O1_21 C1_21 1.244(17) . ? 
C1_21 N1_21 1.405(16) . ? 
C1_21 H1_21 0.9400 . ? 
N1_21 C2_21 1.421(16) . ? 
N1_21 C3_21 1.434(17) . ? 
C2_21 H21_21 0.9700 . ? 
C2_21 H22_21 0.9700 . ? 
C2_21 H23_21 0.9700 . ? 
C3_21 H31_21 0.9700 . ? 
C3_21 H32_21 0.9700 . ? 
C3_21 H33_21 0.9700 . ? 
 
loop_ 
 _geom_angle_atom_site_label_1 
 _geom_angle_atom_site_label_2 
 _geom_angle_atom_site_label_3 
 _geom_angle 
 _geom_angle_site_symmetry_1 
 _geom_angle_site_symmetry_3 
 _geom_angle_publ_flag 
CA_1 NT_1 H1_1 110.6(8) . . ? 
CA_1 NT_1 H2_1 108.4(7) . . ? 
H1_1 NT_1 H2_1 101.1(7) . . ? 
NT_1 CA_1 C_1 113.8(6) . . ? 
NT_1 CA_1 C2_1 115.9(7) . . ? 
C_1 CA_1 C2_1 106.8(6) . . ? 
NT_1 CA_1 HA_1 106.6 . . ? 
C_1 CA_1 HA_1 106.6 . . ? 
C2_1 CA_1 HA_1 106.6 . . ? 
C3_1 C2_1 CA_1 118.4(9) . . ? 
C3_1 C2_1 H2A_1 107.7 . . ? 
CA_1 C2_1 H2A_1 107.7 . . ? 
C3_1 C2_1 H2B_1 107.7 . . ? 
CA_1 C2_1 H2B_1 107.7 . . ? 
H2A_1 C2_1 H2B_1 107.1 . . ? 
C5_1 C3_1 C2_1 114.2(12) . . ? 
C5_1 C3_1 C4_1 107.0(14) . . ? 
C2_1 C3_1 C4_1 108.2(12) . . ? 
C5_1 C3_1 H3_1 109.1 . . ? 
C2_1 C3_1 H3_1 109.1 . . ? 
C4_1 C3_1 H3_1 109.1 . . ? 
C3_1 C4_1 H4A_1 109.5 . . ? 
C3_1 C4_1 H4B_1 109.5 . . ? 
H4A_1 C4_1 H4B_1 109.5 . . ? 
C3_1 C4_1 H4C_1 109.5 . . ? 
H4A_1 C4_1 H4C_1 109.5 . . ? 
H4B_1 C4_1 H4C_1 109.5 . . ? 
C3_1 C5_1 H5A_1 109.5 . . ? 
C3_1 C5_1 H5B_1 109.5 . . ? 
H5A_1 C5_1 H5B_1 109.5 . . ? 
C3_1 C5_1 H5C_1 109.5 . . ? 
H5A_1 C5_1 H5C_1 109.5 . . ? 
H5B_1 C5_1 H5C_1 109.5 . . ? 
O_1 C_1 N_2 123.1(6) . . ? 
O_1 C_1 CA_1 119.6(5) . . ? 
N_2 C_1 CA_1 117.4(5) . . ? 
C_1 N_2 CA_2 122.1(5) . . ? 
C_1 N_2 H0_2 119.0 . . ? 
CA_2 N_2 H0_2 119.0 . . ? 
N_2 CA_2 C_2 113.0(6) . . ? 
N_2 CA_2 C2_2 108.5(5) . . ? 
C_2 CA_2 C2_2 109.2(5) . . ? 
N_2 CA_2 HA_2 108.7 . . ? 
C_2 CA_2 HA_2 108.7 . . ? 
C2_2 CA_2 HA_2 108.7 . . ? 
C3_2 C2_2 CA_2 115.0(7) . . ? 
C3_2 C2_2 H2A_2 108.5 . . ? 
CA_2 C2_2 H2A_2 108.5 . . ? 
C3_2 C2_2 H2B_2 108.5 . . ? 
CA_2 C2_2 H2B_2 108.5 . . ? 
H2A_2 C2_2 H2B_2 107.5 . . ? 
C4_2 C3_2 C2_2 112.8(9) . . ? 
C4_2 C3_2 C5_2 110.8(10) . . ? 
C2_2 C3_2 C5_2 109.3(8) . . ? 
C4_2 C3_2 H3_2 107.9 . . ? 
C2_2 C3_2 H3_2 107.9 . . ? 
C5_2 C3_2 H3_2 107.9 . . ? 
C3_2 C4_2 H4A_2 109.5 . . ? 
C3_2 C4_2 H4B_2 109.5 . . ? 
H4A_2 C4_2 H4B_2 109.5 . . ? 
C3_2 C4_2 H4C_2 109.5 . . ? 
H4A_2 C4_2 H4C_2 109.5 . . ? 
H4B_2 C4_2 H4C_2 109.5 . . ? 
C3_2 C5_2 H5A_2 109.5 . . ? 
C3_2 C5_2 H5B_2 109.5 . . ? 
H5A_2 C5_2 H5B_2 109.5 . . ? 
C3_2 C5_2 H5C_2 109.5 . . ? 
H5A_2 C5_2 H5C_2 109.5 . . ? 
H5B_2 C5_2 H5C_2 109.5 . . ? 
O_2 C_2 N_3 122.1(5) . . ? 
O_2 C_2 CA_2 119.7(6) . . ? 
N_3 C_2 CA_2 118.1(5) . . ? 
C_2 N_3 CA_3 120.4(5) . . ? 
C_2 N_3 H0_3 119.8 . . ? 
CA_3 N_3 H0_3 119.8 . . ? 
N_3 CA_3 C5_3 110.1(5) . . ? 
N_3 CA_3 C2_3 112.7(5) . . ? 
C5_3 CA_3 C2_3 104.7(5) . . ? 
N_3 CA_3 C_3 109.5(4) . . ? 
C5_3 CA_3 C_3 109.1(5) . . ? 
C2_3 CA_3 C_3 110.7(5) . . ? 
C3_3 C2_3 CA_3 105.8(5) . . ? 
C3_3 C2_3 H2A_3 111(5) . . ? 
CA_3 C2_3 H2A_3 111(5) . . ? 
C3_3 C2_3 H2B_3 111(5) . . ? 
CA_3 C2_3 H2B_3 111(5) . . ? 
H2A_3 C2_3 H2B_3 109(7) . . ? 
O3_3 C3_3 C4_3 107.6(7) . . ? 
O3_3 C3_3 C2_3 113.7(6) . . ? 
C4_3 C3_3 C2_3 106.9(5) . . ? 
O3_3 C3_3 H3_3 109.5 . . ? 
C4_3 C3_3 H3_3 109.5 . . ? 
C2_3 C3_3 H3_3 109.5 . . ? 
O4_3 C4_3 C3_3 110.6(6) . . ? 
O4_3 C4_3 C5_3 113.5(6) . . ? 
C3_3 C4_3 C5_3 101.9(6) . . ? 
O4_3 C4_3 H4_3 110.2 . . ? 
C3_3 C4_3 H4_3 110.2 . . ? 
C5_3 C4_3 H4_3 110.2 . . ? 
C4_3 C5_3 CA_3 105.4(5) . . ? 
C4_3 C5_3 H5A_3 111(5) . . ? 
CA_3 C5_3 H5A_3 111(5) . . ? 
C4_3 C5_3 H5B_3 111(5) . . ? 
CA_3 C5_3 H5B_3 111(5) . . ? 
H5A_3 C5_3 H5B_3 109(7) . . ? 
O_3 C_3 N_4 122.5(5) . . ? 
O_3 C_3 CA_3 122.5(5) . . ? 
N_4 C_3 CA_3 114.9(4) . . ? 
C3'_3 O3_3 C3_3 113.4(8) . . ? 
O3_3 C3'_3 H3'1_3 109.5 . . ? 
O3_3 C3'_3 H3'2_3 109.5 . . ? 
H3'1_3 C3'_3 H3'2_3 109.5 . . ? 
O3_3 C3'_3 H3'3_3 109.5 . . ? 
H3'1_3 C3'_3 H3'3_3 109.5 . . ? 
H3'2_3 C3'_3 H3'3_3 109.5 . . ? 
C4'_3 O4_3 C4_3 114.1(8) . . ? 
O4_3 C4'_3 H4'1_3 109.5 . . ? 
O4_3 C4'_3 H4'2_3 109.5 . . ? 
H4'1_3 C4'_3 H4'2_3 109.5 . . ? 
O4_3 C4'_3 H4'3_3 109.5 . . ? 
H4'1_3 C4'_3 H4'3_3 109.5 . . ? 
H4'2_3 C4'_3 H4'3_3 109.5 . . ? 
C_3 N_4 CA_4 120.1(4) . . ? 
C_3 N_4 H0_4 119.9 . . ? 
CA_4 N_4 H0_4 119.9 . . ? 
N_4 CA_4 C_4 113.0(4) . . ? 
N_4 CA_4 C2_4 111.0(5) . . ? 
C_4 CA_4 C2_4 110.6(5) . . ? 
N_4 CA_4 HA_4 107.3 . . ? 
C_4 CA_4 HA_4 107.3 . . ? 
C2_4 CA_4 HA_4 107.3 . . ? 
C3_4 C2_4 CA_4 119.3(6) . . ? 
C3_4 C2_4 H2A_4 107.5 . . ? 
CA_4 C2_4 H2A_4 107.5 . . ? 
C3_4 C2_4 H2B_4 107.5 . . ? 
CA_4 C2_4 H2B_4 107.5 . . ? 
H2A_4 C2_4 H2B_4 107.0 . . ? 
C5_4 C3_4 C2_4 130.5(11) . . ? 
C5_4 C3_4 C4_4 115.2(11) . . ? 
C2_4 C3_4 C4_4 114.0(9) . . ? 
C5_4 C3_4 C5'_4 62.5(16) . . ? 
C2_4 C3_4 C5'_4 107.5(11) . . ? 
C4_4 C3_4 C5'_4 105.9(14) . . ? 
C5_4 C3_4 H3_4 91.5 . . ? 
C2_4 C3_4 H3_4 91.5 . . ? 
C4_4 C3_4 H3_4 91.5 . . ? 
C5'_4 C3_4 H3_4 29.2 . . ? 
C3_4 C4_4 H4A_4 109.5 . . ? 
C3_4 C4_4 H4B_4 109.5 . . ? 
H4A_4 C4_4 H4B_4 109.5 . . ? 
C3_4 C4_4 H4C_4 109.5 . . ? 
H4A_4 C4_4 H4C_4 109.5 . . ? 
H4B_4 C4_4 H4C_4 109.5 . . ? 
C3_4 C5_4 H5A_4 109.5 . . ? 
C3_4 C5_4 H5B_4 109.5 . . ? 
H5A_4 C5_4 H5B_4 109.5 . . ? 
C3_4 C5_4 H5C_4 109.5 . . ? 
H5A_4 C5_4 H5C_4 109.5 . . ? 
H5B_4 C5_4 H5C_4 109.5 . . ? 
C3_4 C5'_4 H5'1_4 109.5 . . ? 
C3_4 C5'_4 H5'2_4 109.5 . . ? 
H5'1_4 C5'_4 H5'2_4 109.5 . . ? 
C3_4 C5'_4 H5'3_4 109.5 . . ? 
H5'1_4 C5'_4 H5'3_4 109.5 . . ? 
H5'2_4 C5'_4 H5'3_4 109.5 . . ? 
O_4 C_4 N_5 122.3(5) . . ? 
O_4 C_4 CA_4 121.0(4) . . ? 
N_5 C_4 CA_4 116.7(4) . . ? 
C_4 N_5 CA_5 120.0(4) . . ? 
C_4 N_5 H0_5 120.0 . . ? 
CA_5 N_5 H0_5 120.0 . . ? 
N_5 CA_5 C2_5 110.4(4) . . ? 
N_5 CA_5 C_5 110.8(4) . . ? 
C2_5 CA_5 C_5 110.0(4) . . ? 
N_5 CA_5 HA_5 108.6 . . ? 
C2_5 CA_5 HA_5 108.6 . . ? 
C_5 CA_5 HA_5 108.6 . . ? 
CA_5 C2_5 C3_5 115.1(5) . . ? 
CA_5 C2_5 H2A_5 108.5 . . ? 
C3_5 C2_5 H2A_5 108.5 . . ? 
CA_5 C2_5 H2B_5 108.5 . . ? 
C3_5 C2_5 H2B_5 108.5 . . ? 
H2A_5 C2_5 H2B_5 107.5 . . ? 
C5_5 C3_5 C4_5 109.8(7) . . ? 
C5_5 C3_5 C2_5 110.6(6) . . ? 
C4_5 C3_5 C2_5 110.9(6) . . ? 
C5_5 C3_5 H3_5 108.5 . . ? 
C4_5 C3_5 H3_5 108.5 . . ? 
C2_5 C3_5 H3_5 108.5 . . ? 
C3_5 C4_5 H4A_5 109.5 . . ? 
C3_5 C4_5 H4B_5 109.5 . . ? 
H4A_5 C4_5 H4B_5 109.5 . . ? 
C3_5 C4_5 H4C_5 109.5 . . ? 
H4A_5 C4_5 H4C_5 109.5 . . ? 
H4B_5 C4_5 H4C_5 109.5 . . ? 
C3_5 C5_5 H5A_5 109.5 . . ? 
C3_5 C5_5 H5B_5 109.5 . . ? 
H5A_5 C5_5 H5B_5 109.5 . . ? 
C3_5 C5_5 H5C_5 109.5 . . ? 
H5A_5 C5_5 H5C_5 109.5 . . ? 
H5B_5 C5_5 H5C_5 109.5 . . ? 
O_5 C_5 N_6 123.5(4) . . ? 
O_5 C_5 CA_5 120.5(4) . . ? 
N_6 C_5 CA_5 116.0(4) . . ? 
C_5 N_6 CA_6 122.1(4) . . ? 
C_5 N_6 H0_6 118.9 . . ? 
CA_6 N_6 H0_6 118.9 . . ? 
N_6 CA_6 C5_6 110.7(4) . . ? 
N_6 CA_6 C_6 108.6(4) . . ? 
C5_6 CA_6 C_6 109.1(4) . . ? 
N_6 CA_6 C2_6 113.8(4) . . ? 
C5_6 CA_6 C2_6 104.0(4) . . ? 
C_6 CA_6 C2_6 110.5(4) . . ? 
C3_6 C2_6 CA_6 105.4(4) . . ? 
C3_6 C2_6 H2A_6 111(4) . . ? 
CA_6 C2_6 H2A_6 111(4) . . ? 
C3_6 C2_6 H2B_6 111(4) . . ? 
CA_6 C2_6 H2B_6 111(4) . . ? 
H2A_6 C2_6 H2B_6 109(6) . . ? 
O3_6 C3_6 C4_6 110.8(5) . . ? 
O3_6 C3_6 C2_6 113.9(5) . . ? 
C4_6 C3_6 C2_6 103.0(4) . . ? 
O3_6 C3_6 H3_6 109.7 . . ? 
C4_6 C3_6 H3_6 109.7 . . ? 
C2_6 C3_6 H3_6 109.7 . . ? 
O4_6 C4_6 C5_6 109.8(5) . . ? 
O4_6 C4_6 C3_6 114.6(5) . . ? 
C5_6 C4_6 C3_6 101.8(5) . . ? 
O4_6 C4_6 H4_6 110.1 . . ? 
C5_6 C4_6 H4_6 110.1 . . ? 
C3_6 C4_6 H4_6 110.1 . . ? 
C4_6 C5_6 CA_6 104.2(4) . . ? 
C4_6 C5_6 H5A_6 111(4) . . ? 
CA_6 C5_6 H5A_6 111(4) . . ? 
C4_6 C5_6 H5B_6 111(4) . . ? 
CA_6 C5_6 H5B_6 111(4) . . ? 
H5A_6 C5_6 H5B_6 109(6) . . ? 
O_6 C_6 N_7 121.3(4) . . ? 
O_6 C_6 CA_6 123.6(4) . . ? 
N_7 C_6 CA_6 115.0(4) . . ? 
C3'_6 O3_6 C3_6 111.9(6) . . ? 
O3_6 C3'_6 H3'1_6 109.5 . . ? 
O3_6 C3'_6 H3'2_6 109.5 . . ? 
H3'1_6 C3'_6 H3'2_6 109.5 . . ? 
O3_6 C3'_6 H3'3_6 109.5 . . ? 
H3'1_6 C3'_6 H3'3_6 109.5 . . ? 
H3'2_6 C3'_6 H3'3_6 109.5 . . ? 
C4'_6 O4_6 C4_6 115.2(6) . . ? 
O4_6 C4'_6 H4'1_6 109.5 . . ? 
O4_6 C4'_6 H4'2_6 109.5 . . ? 
H4'1_6 C4'_6 H4'2_6 109.5 . . ? 
O4_6 C4'_6 H4'3_6 109.5 . . ? 
H4'1_6 C4'_6 H4'3_6 109.5 . . ? 
H4'2_6 C4'_6 H4'3_6 109.5 . . ? 
C_6 N_7 CA_7 119.6(4) . . ? 
C_6 N_7 H0_7 120.2 . . ? 
CA_7 N_7 H0_7 120.2 . . ? 
N_7 CA_7 C2_7 111.7(4) . . ? 
N_7 CA_7 C_7 111.2(4) . . ? 
C2_7 CA_7 C_7 111.2(4) . . ? 
N_7 CA_7 HA_7 107.5 . . ? 
C2_7 CA_7 HA_7 107.5 . . ? 
C_7 CA_7 HA_7 107.5 . . ? 
CA_7 C2_7 C3_7 114.1(4) . . ? 
CA_7 C2_7 H2A_7 108.7 . . ? 
C3_7 C2_7 H2A_7 108.7 . . ? 
CA_7 C2_7 H2B_7 108.7 . . ? 
C3_7 C2_7 H2B_7 108.7 . . ? 
H2A_7 C2_7 H2B_7 107.6 . . ? 
C5_7 C3_7 C4_7 111.3(5) . . ? 
C5_7 C3_7 C2_7 112.4(5) . . ? 
C4_7 C3_7 C2_7 110.1(5) . . ? 
C5_7 C3_7 H3_7 107.6 . . ? 
C4_7 C3_7 H3_7 107.6 . . ? 
C2_7 C3_7 H3_7 107.6 . . ? 
C3_7 C4_7 H4A_7 109.5 . . ? 
C3_7 C4_7 H4B_7 109.5 . . ? 
H4A_7 C4_7 H4B_7 109.5 . . ? 
C3_7 C4_7 H4C_7 109.5 . . ? 
H4A_7 C4_7 H4C_7 109.5 . . ? 
H4B_7 C4_7 H4C_7 109.5 . . ? 
C3_7 C5_7 H5A_7 109.5 . . ? 
C3_7 C5_7 H5B_7 109.5 . . ? 
H5A_7 C5_7 H5B_7 109.5 . . ? 
C3_7 C5_7 H5C_7 109.5 . . ? 
H5A_7 C5_7 H5C_7 109.5 . . ? 
H5B_7 C5_7 H5C_7 109.5 . . ? 
O_7 C_7 N_8 122.5(4) . . ? 
O_7 C_7 CA_7 120.8(4) . . ? 
N_8 C_7 CA_7 116.6(4) . . ? 
C_7 N_8 CA_8 118.5(4) . . ? 
C_7 N_8 H0_8 120.7 . . ? 
CA_8 N_8 H0_8 120.7 . . ? 
N_8 CA_8 C2_8 110.3(4) . . ? 
N_8 CA_8 C_8 111.3(3) . . ? 
C2_8 CA_8 C_8 111.3(4) . . ? 
N_8 CA_8 HA_8 107.9 . . ? 
C2_8 CA_8 HA_8 107.9 . . ? 
C_8 CA_8 HA_8 107.9 . . ? 
CA_8 C2_8 C3_8 114.8(5) . . ? 
CA_8 C2_8 H2A_8 108.6 . . ? 
C3_8 C2_8 H2A_8 108.6 . . ? 
CA_8 C2_8 H2B_8 108.6 . . ? 
C3_8 C2_8 H2B_8 108.6 . . ? 
H2A_8 C2_8 H2B_8 107.5 . . ? 
C5_8 C3_8 C2_8 112.0(7) . . ? 
C5_8 C3_8 C4_8 112.3(7) . . ? 
C2_8 C3_8 C4_8 109.0(6) . . ? 
C5_8 C3_8 H3_8 107.8 . . ? 
C2_8 C3_8 H3_8 107.8 . . ? 
C4_8 C3_8 H3_8 107.8 . . ? 
C3_8 C4_8 H4A_8 109.5 . . ? 
C3_8 C4_8 H4B_8 109.5 . . ? 
H4A_8 C4_8 H4B_8 109.5 . . ? 
C3_8 C4_8 H4C_8 109.5 . . ? 
H4A_8 C4_8 H4C_8 109.5 . . ? 
H4B_8 C4_8 H4C_8 109.5 . . ? 
C3_8 C5_8 H5A_8 109.5 . . ? 
C3_8 C5_8 H5B_8 109.5 . . ? 
H5A_8 C5_8 H5B_8 109.5 . . ? 
C3_8 C5_8 H5C_8 109.5 . . ? 
H5A_8 C5_8 H5C_8 109.5 . . ? 
H5B_8 C5_8 H5C_8 109.5 . . ? 
O_8 C_8 N_9 122.3(4) . . ? 
O_8 C_8 CA_8 121.6(4) . . ? 
N_9 C_8 CA_8 116.1(4) . . ? 
C_8 N_9 CA_9 120.4(4) . . ? 
C_8 N_9 H0_9 119.8 . . ? 
CA_9 N_9 H0_9 119.8 . . ? 
N_9 CA_9 C2_9 112.8(4) . . ? 
N_9 CA_9 C_9 109.2(4) . . ? 
C2_9 CA_9 C_9 111.7(4) . . ? 
N_9 CA_9 C5_9 109.2(4) . . ? 
C2_9 CA_9 C5_9 105.1(4) . . ? 
C_9 CA_9 C5_9 108.7(4) . . ? 
C3_9 C2_9 CA_9 106.9(4) . . ? 
C3_9 C2_9 H2A_9 110(4) . . ? 
CA_9 C2_9 H2A_9 110(4) . . ? 
C3_9 C2_9 H2B_9 110(4) . . ? 
CA_9 C2_9 H2B_9 110(4) . . ? 
H2A_9 C2_9 H2B_9 109(6) . . ? 
O3_9 C3_9 C4_9 111.2(5) . . ? 
O3_9 C3_9 C2_9 114.5(5) . . ? 
C4_9 C3_9 C2_9 103.7(4) . . ? 
O3_9 C3_9 H3_9 109.1 . . ? 
C4_9 C3_9 H3_9 109.1 . . ? 
C2_9 C3_9 H3_9 109.1 . . ? 
O4_9 C4_9 C5_9 108.7(4) . . ? 
O4_9 C4_9 C3_9 115.5(5) . . ? 
C5_9 C4_9 C3_9 103.2(4) . . ? 
O4_9 C4_9 H4_9 109.7 . . ? 
C5_9 C4_9 H4_9 109.7 . . ? 
C3_9 C4_9 H4_9 109.7 . . ? 
C4_9 C5_9 CA_9 105.0(4) . . ? 
C4_9 C5_9 H5A_9 111(4) . . ? 
CA_9 C5_9 H5A_9 111(4) . . ? 
C4_9 C5_9 H5B_9 111(4) . . ? 
CA_9 C5_9 H5B_9 111(4) . . ? 
H5A_9 C5_9 H5B_9 109(5) . . ? 
O_9 C_9 N_10 122.5(5) . . ? 
O_9 C_9 CA_9 122.5(5) . . ? 
N_10 C_9 CA_9 114.9(4) . . ? 
C3_9 O3_9 C3'_9 113.6(6) . . ? 
O3_9 C3'_9 H3'1_9 109.5 . . ? 
O3_9 C3'_9 H3'2_9 109.5 . . ? 
H3'1_9 C3'_9 H3'2_9 109.5 . . ? 
O3_9 C3'_9 H3'3_9 109.5 . . ? 
H3'1_9 C3'_9 H3'3_9 109.5 . . ? 
H3'2_9 C3'_9 H3'3_9 109.5 . . ? 
C4'_9 O4_9 C4_9 114.3(5) . . ? 
O4_9 C4'_9 H4'1_9 109.5 . . ? 
O4_9 C4'_9 H4'2_9 109.5 . . ? 
H4'1_9 C4'_9 H4'2_9 109.5 . . ? 
O4_9 C4'_9 H4'3_9 109.5 . . ? 
H4'1_9 C4'_9 H4'3_9 109.5 . . ? 
H4'2_9 C4'_9 H4'3_9 109.5 . . ? 
C_9 N_10 CA_10 121.7(5) . . ? 
C_9 N_10 H0_10 119.1 . . ? 
CA_10 N_10 H0_10 119.1 . . ? 
N_10 CA_10 C2_10 110.1(5) . . ? 
N_10 CA_10 C_10 113.7(4) . . ? 
C2_10 CA_10 C_10 110.9(5) . . ? 
N_10 CA_10 HA_10 107.3 . . ? 
C2_10 CA_10 HA_10 107.3 . . ? 
C_10 CA_10 HA_10 107.3 . . ? 
CA_10 C2_10 C3_10 113.3(5) . . ? 
CA_10 C2_10 H2A_10 108.9 . . ? 
C3_10 C2_10 H2A_10 108.9 . . ? 
CA_10 C2_10 H2B_10 108.9 . . ? 
C3_10 C2_10 H2B_10 108.9 . . ? 
H2A_10 C2_10 H2B_10 107.7 . . ? 
C4_10 C3_10 C5_10 110.9(6) . . ? 
C4_10 C3_10 C2_10 112.5(7) . . ? 
C5_10 C3_10 C2_10 108.2(7) . . ? 
C4_10 C3_10 H3_10 108.4 . . ? 
C5_10 C3_10 H3_10 108.4 . . ? 
C2_10 C3_10 H3_10 108.4 . . ? 
C3_10 C4_10 H4A_10 109.5 . . ? 
C3_10 C4_10 H4B_10 109.5 . . ? 
H4A_10 C4_10 H4B_10 109.5 . . ? 
C3_10 C4_10 H4C_10 109.5 . . ? 
H4A_10 C4_10 H4C_10 109.5 . . ? 
H4B_10 C4_10 H4C_10 109.5 . . ? 
C3_10 C5_10 H5A_10 109.5 . . ? 
C3_10 C5_10 H5B_10 109.5 . . ? 
H5A_10 C5_10 H5B_10 109.5 . . ? 
C3_10 C5_10 H5C_10 109.5 . . ? 
H5A_10 C5_10 H5C_10 109.5 . . ? 
H5B_10 C5_10 H5C_10 109.5 . . ? 
O_10 C_10 N_11 123.2(6) . . ? 
O_10 C_10 CA_10 119.5(6) . . ? 
N_11 C_10 CA_10 117.2(5) . . ? 
C_10 N_11 CA_11 121.5(5) . . ? 
C_10 N_11 H0_11 119.3 . . ? 
CA_11 N_11 H0_11 119.3 . . ? 
N_11 CA_11 C_11 113.5(5) . . ? 
N_11 CA_11 C2_11 111.7(5) . . ? 
C_11 CA_11 C2_11 110.5(6) . . ? 
N_11 CA_11 HA_11 106.9 . . ? 
C_11 CA_11 HA_11 106.9 . . ? 
C2_11 CA_11 HA_11 106.9 . . ? 
C3_11 C2_11 CA_11 116.8(7) . . ? 
C3_11 C2_11 H2A_11 108.1 . . ? 
CA_11 C2_11 H2A_11 108.1 . . ? 
C3_11 C2_11 H2B_11 108.1 . . ? 
CA_11 C2_11 H2B_11 108.1 . . ? 
H2A_11 C2_11 H2B_11 107.3 . . ? 
C5_11 C3_11 C2_11 109.7(9) . . ? 
C5_11 C3_11 C4_11 113.0(9) . . ? 
C2_11 C3_11 C4_11 113.0(8) . . ? 
C5_11 C3_11 H3_11 106.9 . . ? 
C2_11 C3_11 H3_11 106.9 . . ? 
C4_11 C3_11 H3_11 106.9 . . ? 
C3_11 C4_11 H4A_11 109.5 . . ? 
C3_11 C4_11 H4B_11 109.5 . . ? 
H4A_11 C4_11 H4B_11 109.5 . . ? 
C3_11 C4_11 H4C_11 109.5 . . ? 
H4A_11 C4_11 H4C_11 109.5 . . ? 
H4B_11 C4_11 H4C_11 109.5 . . ? 
C3_11 C5_11 H5A_11 109.5 . . ? 
C3_11 C5_11 H5B_11 109.5 . . ? 
H5A_11 C5_11 H5B_11 109.5 . . ? 
C3_11 C5_11 H5C_11 109.5 . . ? 
H5A_11 C5_11 H5C_11 109.5 . . ? 
H5B_11 C5_11 H5C_11 109.5 . . ? 
O_11 C_11 N_12 121.8(7) . . ? 
O_11 C_11 CA_11 119.6(6) . . ? 
N_12 C_11 CA_11 118.6(5) . . ? 
C_11 N_12 CA_12 120.5(6) . . ? 
C_11 N_12 H0_12 119.7 . . ? 
CA_12 N_12 H0_12 119.7 . . ? 
N_12 CA_12 C_12 113.5(9) . . ? 
N_12 CA_12 C2_12 111.6(6) . . ? 
C_12 CA_12 C2_12 108.5(8) . . ? 
N_12 CA_12 C5_12 109.8(8) . . ? 
C_12 CA_12 C5_12 110.4(8) . . ? 
C2_12 CA_12 C5_12 102.5(8) . . ? 
C3_12 C2_12 CA_12 106.8(8) . . ? 
C3_12 C2_12 H2A_12 110(6) . . ? 
CA_12 C2_12 H2A_12 110(7) . . ? 
C3_12 C2_12 H2B_12 110(6) . . ? 
CA_12 C2_12 H2B_12 110(7) . . ? 
H2A_12 C2_12 H2B_12 109(9) . . ? 
O3_12 C3_12 C2_12 115.5(9) . . ? 
O3_12 C3_12 C4_12 108.6(8) . . ? 
C2_12 C3_12 C4_12 104.9(9) . . ? 
O3_12 C3_12 H3_12 109.2 . . ? 
C2_12 C3_12 H3_12 109.2 . . ? 
C4_12 C3_12 H3_12 109.2 . . ? 
O4_12 C4_12 C3_12 112.8(10) . . ? 
O4_12 C4_12 C5_12 116.1(10) . . ? 
C3_12 C4_12 C5_12 103.3(8) . . ? 
O4_12 C4_12 H4_12 108.1 . . ? 
C3_12 C4_12 H4_12 108.1 . . ? 
C5_12 C4_12 H4_12 108.1 . . ? 
C4_12 C5_12 CA_12 107.7(8) . . ? 
C4_12 C5_12 H5A_12 110(8) . . ? 
CA_12 C5_12 H5A_12 110(7) . . ? 
C4_12 C5_12 H5B_12 110(7) . . ? 
CA_12 C5_12 H5B_12 110(7) . . ? 
H5A_12 C5_12 H5B_12 108(10) . . ? 
O_12 C_12 O7_12 124.3(12) . . ? 
O_12 C_12 CA_12 124.0(13) . . ? 
O7_12 C_12 CA_12 111.7(9) . . ? 
C3'_12 O3_12 C3_12 111.9(8) . . ? 
O3_12 C3'_12 H3'1_12 109.5 . . ? 
O3_12 C3'_12 H3'2_12 109.5 . . ? 
H3'1_12 C3'_12 H3'2_12 109.5 . . ? 
O3_12 C3'_12 H3'3_12 109.5 . . ? 
H3'1_12 C3'_12 H3'3_12 109.5 . . ? 
H3'2_12 C3'_12 H3'3_12 109.5 . . ? 
C4_12 O4_12 C4'_12 113.7(11) . . ? 
O4_12 C4'_12 H4'1_12 109.5 . . ? 
O4_12 C4'_12 H4'2_12 109.5 . . ? 
H4'1_12 C4'_12 H4'2_12 109.5 . . ? 
O4_12 C4'_12 H4'3_12 109.5 . . ? 
H4'1_12 C4'_12 H4'3_12 109.5 . . ? 
H4'2_12 C4'_12 H4'3_12 109.5 . . ? 
C_12 O7_12 C7_12 123.2(11) . . ? 
O7_12 C7_12 H7A_12 109.5 . . ? 
O7_12 C7_12 H7B_12 109.5 . . ? 
H7A_12 C7_12 H7B_12 109.5 . . ? 
O7_12 C7_12 H7C_12 109.5 . . ? 
H7A_12 C7_12 H7C_12 109.5 . . ? 
H7B_12 C7_12 H7C_12 109.5 . . ? 
O1_20 C1_20 N1_20 149(2) . . ? 
O1_20 C1_20 H1_20 105.6 . . ? 
N1_20 C1_20 H1_20 105.6 . . ? 
C1_20 N1_20 C2_20 123.6(15) . . ? 
C1_20 N1_20 C3_20 119.5(14) . . ? 
C2_20 N1_20 C3_20 116.8(13) . . ? 
N1_20 C2_20 H21_20 109.5 . . ? 
N1_20 C2_20 H22_20 109.5 . . ? 
H21_20 C2_20 H22_20 109.5 . . ? 
N1_20 C2_20 H23_20 109.5 . . ? 
H21_20 C2_20 H23_20 109.5 . . ? 
H22_20 C2_20 H23_20 109.5 . . ? 
N1_20 C3_20 H31_20 109.5 . . ? 
N1_20 C3_20 H32_20 109.5 . . ? 
H31_20 C3_20 H32_20 109.5 . . ? 
N1_20 C3_20 H33_20 109.5 . . ? 
H31_20 C3_20 H33_20 109.5 . . ? 
H32_20 C3_20 H33_20 109.5 . . ? 
O1_21 C1_21 N1_21 124.2(18) . . ? 
O1_21 C1_21 H1_21 117.9 . . ? 
N1_21 C1_21 H1_21 117.9 . . ? 
C1_21 N1_21 C2_21 120.2(15) . . ? 
C1_21 N1_21 C3_21 117.6(14) . . ? 
C2_21 N1_21 C3_21 119.9(15) . . ? 
N1_21 C2_21 H21_21 109.5 . . ? 
N1_21 C2_21 H22_21 109.5 . . ? 
H21_21 C2_21 H22_21 109.5 . . ? 
N1_21 C2_21 H23_21 109.5 . . ? 
H21_21 C2_21 H23_21 109.5 . . ? 
H22_21 C2_21 H23_21 109.5 . . ? 
N1_21 C3_21 H31_21 109.5 . . ? 
N1_21 C3_21 H32_21 109.5 . . ? 
H31_21 C3_21 H32_21 109.5 . . ? 
N1_21 C3_21 H33_21 109.5 . . ? 
H31_21 C3_21 H33_21 109.5 . . ? 
H32_21 C3_21 H33_21 109.5 . . ? 
 
loop_ 
 _geom_torsion_atom_site_label_1 
 _geom_torsion_atom_site_label_2 
 _geom_torsion_atom_site_label_3 
 _geom_torsion_atom_site_label_4 
 _geom_torsion 
 _geom_torsion_site_symmetry_1 
 _geom_torsion_site_symmetry_2 
 _geom_torsion_site_symmetry_3 
 _geom_torsion_site_symmetry_4 
 _geom_torsion_publ_flag 
NT_1 CA_1 C2_1 C3_1 -66.8(12) . . . . ? 
C_1 CA_1 C2_1 C3_1 165.3(9) . . . . ? 
CA_1 C2_1 C3_1 C5_1 -60.7(16) . . . . ? 
CA_1 C2_1 C3_1 C4_1 -179.7(11) . . . . ? 
NT_1 CA_1 C_1 O_1 167.6(7) . . . . ? 
C2_1 CA_1 C_1 O_1 -63.3(9) . . . . ? 
NT_1 CA_1 C_1 N_2 -12.1(10) . . . . ? 
C2_1 CA_1 C_1 N_2 117.0(7) . . . . ? 
O_1 C_1 N_2 CA_2 6.9(11) . . . . ? 
CA_1 C_1 N_2 CA_2 -173.5(6) . . . . ? 
C_1 N_2 CA_2 C_2 -50.3(9) . . . . ? 
C_1 N_2 CA_2 C2_2 -171.6(7) . . . . ? 
N_2 CA_2 C2_2 C3_2 -179.1(7) . . . . ? 
C_2 CA_2 C2_2 C3_2 57.3(10) . . . . ? 
CA_2 C2_2 C3_2 C4_2 59.2(11) . . . . ? 
CA_2 C2_2 C3_2 C5_2 -177.1(8) . . . . ? 
N_2 CA_2 C_2 O_2 138.0(6) . . . . ? 
C2_2 CA_2 C_2 O_2 -101.1(7) . . . . ? 
N_2 CA_2 C_2 N_3 -44.8(8) . . . . ? 
C2_2 CA_2 C_2 N_3 76.0(7) . . . . ? 
O_2 C_2 N_3 CA_3 0.8(8) . . . . ? 
CA_2 C_2 N_3 CA_3 -176.3(5) . . . . ? 
C_2 N_3 CA_3 C5_3 -177.6(5) . . . . ? 
C_2 N_3 CA_3 C2_3 65.9(6) . . . . ? 
C_2 N_3 CA_3 C_3 -57.7(7) . . . . ? 
N_3 CA_3 C2_3 C3_3 126.4(6) . . . . ? 
C5_3 CA_3 C2_3 C3_3 6.8(7) . . . . ? 
C_3 CA_3 C2_3 C3_3 -110.6(6) . . . . ? 
CA_3 C2_3 C3_3 O3_3 136.2(6) . . . . ? 
CA_3 C2_3 C3_3 C4_3 17.6(8) . . . . ? 
O3_3 C3_3 C4_3 O4_3 81.7(8) . . . . ? 
C2_3 C3_3 C4_3 O4_3 -155.8(7) . . . . ? 
O3_3 C3_3 C4_3 C5_3 -157.3(6) . . . . ? 
C2_3 C3_3 C4_3 C5_3 -34.8(8) . . . . ? 
O4_3 C4_3 C5_3 CA_3 158.0(6) . . . . ? 
C3_3 C4_3 C5_3 CA_3 39.1(7) . . . . ? 
N_3 CA_3 C5_3 C4_3 -149.9(6) . . . . ? 
C2_3 CA_3 C5_3 C4_3 -28.5(7) . . . . ? 
C_3 CA_3 C5_3 C4_3 89.9(6) . . . . ? 
N_3 CA_3 C_3 O_3 140.1(5) . . . . ? 
C5_3 CA_3 C_3 O_3 -99.4(6) . . . . ? 
C2_3 CA_3 C_3 O_3 15.3(8) . . . . ? 
N_3 CA_3 C_3 N_4 -43.6(6) . . . . ? 
C5_3 CA_3 C_3 N_4 76.9(6) . . . . ? 
C2_3 CA_3 C_3 N_4 -168.4(5) . . . . ? 
C4_3 C3_3 O3_3 C3'_3 -175.7(8) . . . . ? 
C2_3 C3_3 O3_3 C3'_3 66.0(10) . . . . ? 
C3_3 C4_3 O4_3 C4'_3 -171.2(9) . . . . ? 
C5_3 C4_3 O4_3 C4'_3 74.9(11) . . . . ? 
O_3 C_3 N_4 CA_4 -4.3(8) . . . . ? 
CA_3 C_3 N_4 CA_4 179.4(5) . . . . ? 
C_3 N_4 CA_4 C_4 -69.9(6) . . . . ? 
C_3 N_4 CA_4 C2_4 165.1(5) . . . . ? 
N_4 CA_4 C2_4 C3_4 -61.1(9) . . . . ? 
C_4 CA_4 C2_4 C3_4 172.6(7) . . . . ? 
CA_4 C2_4 C3_4 C5_4 -1(2) . . . . ? 
CA_4 C2_4 C3_4 C4_4 173.6(10) . . . . ? 
CA_4 C2_4 C3_4 C5'_4 -69.3(15) . . . . ? 
N_4 CA_4 C_4 O_4 140.7(5) . . . . ? 
C2_4 CA_4 C_4 O_4 -94.2(6) . . . . ? 
N_4 CA_4 C_4 N_5 -40.9(6) . . . . ? 
C2_4 CA_4 C_4 N_5 84.2(6) . . . . ? 
O_4 C_4 N_5 CA_5 -2.5(7) . . . . ? 
CA_4 C_4 N_5 CA_5 179.1(4) . . . . ? 
C_4 N_5 CA_5 C2_5 177.5(4) . . . . ? 
C_4 N_5 CA_5 C_5 -60.5(6) . . . . ? 
N_5 CA_5 C2_5 C3_5 -66.6(6) . . . . ? 
C_5 CA_5 C2_5 C3_5 170.9(5) . . . . ? 
CA_5 C2_5 C3_5 C5_5 165.3(6) . . . . ? 
CA_5 C2_5 C3_5 C4_5 -72.7(8) . . . . ? 
N_5 CA_5 C_5 O_5 135.5(5) . . . . ? 
C2_5 CA_5 C_5 O_5 -102.3(5) . . . . ? 
N_5 CA_5 C_5 N_6 -45.4(5) . . . . ? 
C2_5 CA_5 C_5 N_6 76.8(5) . . . . ? 
O_5 C_5 N_6 CA_6 -0.2(7) . . . . ? 
CA_5 C_5 N_6 CA_6 -179.3(4) . . . . ? 
C_5 N_6 CA_6 C5_6 -177.9(4) . . . . ? 
C_5 N_6 CA_6 C_6 -58.1(6) . . . . ? 
C_5 N_6 CA_6 C2_6 65.4(6) . . . . ? 
N_6 CA_6 C2_6 C3_6 118.7(5) . . . . ? 
C5_6 CA_6 C2_6 C3_6 -1.8(5) . . . . ? 
C_6 CA_6 C2_6 C3_6 -118.8(5) . . . . ? 
CA_6 C2_6 C3_6 O3_6 148.6(5) . . . . ? 
CA_6 C2_6 C3_6 C4_6 28.6(6) . . . . ? 
O3_6 C3_6 C4_6 O4_6 74.4(6) . . . . ? 
C2_6 C3_6 C4_6 O4_6 -163.5(5) . . . . ? 
O3_6 C3_6 C4_6 C5_6 -167.1(5) . . . . ? 
C2_6 C3_6 C4_6 C5_6 -45.0(5) . . . . ? 
O4_6 C4_6 C5_6 CA_6 166.1(5) . . . . ? 
C3_6 C4_6 C5_6 CA_6 44.2(5) . . . . ? 
N_6 CA_6 C5_6 C4_6 -148.5(5) . . . . ? 
C_6 CA_6 C5_6 C4_6 92.0(5) . . . . ? 
C2_6 CA_6 C5_6 C4_6 -25.9(5) . . . . ? 
N_6 CA_6 C_6 O_6 133.1(5) . . . . ? 
C5_6 CA_6 C_6 O_6 -106.2(5) . . . . ? 
C2_6 CA_6 C_6 O_6 7.6(7) . . . . ? 
N_6 CA_6 C_6 N_7 -50.8(5) . . . . ? 
C5_6 CA_6 C_6 N_7 70.0(5) . . . . ? 
C2_6 CA_6 C_6 N_7 -176.3(4) . . . . ? 
C4_6 C3_6 O3_6 C3'_6 -171.8(6) . . . . ? 
C2_6 C3_6 O3_6 C3'_6 72.7(7) . . . . ? 
C5_6 C4_6 O4_6 C4'_6 153.7(7) . . . . ? 
C3_6 C4_6 O4_6 C4'_6 -92.4(8) . . . . ? 
O_6 C_6 N_7 CA_7 1.0(7) . . . . ? 
CA_6 C_6 N_7 CA_7 -175.2(4) . . . . ? 
C_6 N_7 CA_7 C2_7 170.9(4) . . . . ? 
C_6 N_7 CA_7 C_7 -64.2(5) . . . . ? 
N_7 CA_7 C2_7 C3_7 179.0(4) . . . . ? 
C_7 CA_7 C2_7 C3_7 54.1(5) . . . . ? 
CA_7 C2_7 C3_7 C5_7 61.0(6) . . . . ? 
CA_7 C2_7 C3_7 C4_7 -174.3(4) . . . . ? 
N_7 CA_7 C_7 O_7 135.8(4) . . . . ? 
C2_7 CA_7 C_7 O_7 -99.0(5) . . . . ? 
N_7 CA_7 C_7 N_8 -45.4(5) . . . . ? 
C2_7 CA_7 C_7 N_8 79.7(5) . . . . ? 
O_7 C_7 N_8 CA_8 1.7(6) . . . . ? 
CA_7 C_7 N_8 CA_8 -177.0(4) . . . . ? 
C_7 N_8 CA_8 C2_8 174.4(4) . . . . ? 
C_7 N_8 CA_8 C_8 -61.6(5) . . . . ? 
N_8 CA_8 C2_8 C3_8 -176.5(5) . . . . ? 
C_8 CA_8 C2_8 C3_8 59.4(6) . . . . ? 
CA_8 C2_8 C3_8 C5_8 57.4(8) . . . . ? 
CA_8 C2_8 C3_8 C4_8 -177.8(6) . . . . ? 
N_8 CA_8 C_8 O_8 140.8(4) . . . . ? 
C2_8 CA_8 C_8 O_8 -95.7(5) . . . . ? 
N_8 CA_8 C_8 N_9 -41.3(5) . . . . ? 
C2_8 CA_8 C_8 N_9 82.2(5) . . . . ? 
O_8 C_8 N_9 CA_9 -1.5(7) . . . . ? 
CA_8 C_8 N_9 CA_9 -179.4(4) . . . . ? 
C_8 N_9 CA_9 C2_9 69.5(5) . . . . ? 
C_8 N_9 CA_9 C_9 -55.3(5) . . . . ? 
C_8 N_9 CA_9 C5_9 -174.1(4) . . . . ? 
N_9 CA_9 C2_9 C3_9 116.1(5) . . . . ? 
C_9 CA_9 C2_9 C3_9 -120.4(5) . . . . ? 
C5_9 CA_9 C2_9 C3_9 -2.7(6) . . . . ? 
CA_9 C2_9 C3_9 O3_9 147.3(5) . . . . ? 
CA_9 C2_9 C3_9 C4_9 25.9(6) . . . . ? 
O3_9 C3_9 C4_9 O4_9 78.5(6) . . . . ? 
C2_9 C3_9 C4_9 O4_9 -158.0(4) . . . . ? 
O3_9 C3_9 C4_9 C5_9 -163.0(5) . . . . ? 
C2_9 C3_9 C4_9 C5_9 -39.4(6) . . . . ? 
O4_9 C4_9 C5_9 CA_9 161.2(4) . . . . ? 
C3_9 C4_9 C5_9 CA_9 38.0(5) . . . . ? 
N_9 CA_9 C5_9 C4_9 -143.0(4) . . . . ? 
C2_9 CA_9 C5_9 C4_9 -21.8(5) . . . . ? 
C_9 CA_9 C5_9 C4_9 97.9(5) . . . . ? 
N_9 CA_9 C_9 O_9 141.5(5) . . . . ? 
C2_9 CA_9 C_9 O_9 16.0(7) . . . . ? 
C5_9 CA_9 C_9 O_9 -99.5(6) . . . . ? 
N_9 CA_9 C_9 N_10 -41.8(5) . . . . ? 
C2_9 CA_9 C_9 N_10 -167.3(4) . . . . ? 
C5_9 CA_9 C_9 N_10 77.3(5) . . . . ? 
C4_9 C3_9 O3_9 C3'_9 -160.9(7) . . . . ? 
C2_9 C3_9 O3_9 C3'_9 82.0(9) . . . . ? 
C5_9 C4_9 O4_9 C4'_9 171.0(6) . . . . ? 
C3_9 C4_9 O4_9 C4'_9 -73.6(7) . . . . ? 
O_9 C_9 N_10 CA_10 0.4(8) . . . . ? 
CA_9 C_9 N_10 CA_10 -176.3(4) . . . . ? 
C_9 N_10 CA_10 C2_10 156.6(5) . . . . ? 
C_9 N_10 CA_10 C_10 -78.2(6) . . . . ? 
N_10 CA_10 C2_10 C3_10 -65.0(6) . . . . ? 
C_10 CA_10 C2_10 C3_10 168.3(5) . . . . ? 
CA_10 C2_10 C3_10 C4_10 -66.3(8) . . . . ? 
CA_10 C2_10 C3_10 C5_10 170.9(6) . . . . ? 
N_10 CA_10 C_10 O_10 154.1(7) . . . . ? 
C2_10 CA_10 C_10 O_10 -81.2(8) . . . . ? 
N_10 CA_10 C_10 N_11 -26.5(8) . . . . ? 
C2_10 CA_10 C_10 N_11 98.2(7) . . . . ? 
O_10 C_10 N_11 CA_11 -3.9(11) . . . . ? 
CA_10 C_10 N_11 CA_11 176.8(6) . . . . ? 
C_10 N_11 CA_11 C_11 -78.4(7) . . . . ? 
C_10 N_11 CA_11 C2_11 155.8(6) . . . . ? 
N_11 CA_11 C2_11 C3_11 -66.1(8) . . . . ? 
C_11 CA_11 C2_11 C3_11 166.6(6) . . . . ? 
CA_11 C2_11 C3_11 C5_11 179.6(7) . . . . ? 
CA_11 C2_11 C3_11 C4_11 -53.4(10) . . . . ? 
N_11 CA_11 C_11 O_11 163.2(6) . . . . ? 
C2_11 CA_11 C_11 O_11 -70.5(8) . . . . ? 
N_11 CA_11 C_11 N_12 -15.9(8) . . . . ? 
C2_11 CA_11 C_11 N_12 110.5(7) . . . . ? 
O_11 C_11 N_12 CA_12 -4.5(11) . . . . ? 
CA_11 C_11 N_12 CA_12 174.5(7) . . . . ? 
C_11 N_12 CA_12 C_12 58.7(10) . . . . ? 
C_11 N_12 CA_12 C2_12 -178.4(8) . . . . ? 
C_11 N_12 CA_12 C5_12 -65.4(10) . . . . ? 
N_12 CA_12 C2_12 C3_12 99.7(9) . . . . ? 
C_12 CA_12 C2_12 C3_12 -134.5(9) . . . . ? 
C5_12 CA_12 C2_12 C3_12 -17.8(10) . . . . ? 
CA_12 C2_12 C3_12 O3_12 155.4(8) . . . . ? 
CA_12 C2_12 C3_12 C4_12 35.8(10) . . . . ? 
O3_12 C3_12 C4_12 O4_12 71.2(12) . . . . ? 
C2_12 C3_12 C4_12 O4_12 -164.7(9) . . . . ? 
O3_12 C3_12 C4_12 C5_12 -162.7(10) . . . . ? 
C2_12 C3_12 C4_12 C5_12 -38.6(12) . . . . ? 
O4_12 C4_12 C5_12 CA_12 151.3(9) . . . . ? 
C3_12 C4_12 C5_12 CA_12 27.4(13) . . . . ? 
N_12 CA_12 C5_12 C4_12 -124.8(9) . . . . ? 
C_12 CA_12 C5_12 C4_12 109.3(10) . . . . ? 
C2_12 CA_12 C5_12 C4_12 -6.1(11) . . . . ? 
N_12 CA_12 C_12 O_12 -143.5(11) . . . . ? 
C2_12 CA_12 C_12 O_12 91.8(12) . . . . ? 
C5_12 CA_12 C_12 O_12 -19.7(14) . . . . ? 
N_12 CA_12 C_12 O7_12 36.2(11) . . . . ? 
C2_12 CA_12 C_12 O7_12 -88.5(10) . . . . ? 
C5_12 CA_12 C_12 O7_12 160.0(8) . . . . ? 
C2_12 C3_12 O3_12 C3'_12 72.0(13) . . . . ? 
C4_12 C3_12 O3_12 C3'_12 -170.5(12) . . . . ? 
C3_12 C4_12 O4_12 C4'_12 -179.4(10) . . . . ? 
C5_12 C4_12 O4_12 C4'_12 61.7(13) . . . . ? 
O_12 C_12 O7_12 C7_12 -0.7(18) . . . . ? 
CA_12 C_12 O7_12 C7_12 179.6(10) . . . . ? 
O1_20 C1_20 N1_20 C2_20 160(4) . . . . ? 
O1_20 C1_20 N1_20 C3_20 -23(6) . . . . ? 
O1_21 C1_21 N1_21 C2_21 173(3) . . . . ? 
O1_21 C1_21 N1_21 C3_21 10(4) . . . . ? 
 
_diffrn_measured_fraction_theta_max    0.981 
_diffrn_reflns_theta_full              26.73 
_diffrn_measured_fraction_theta_full   0.981 
_refine_diff_density_max    0.723 
_refine_diff_density_min   -0.323 
_refine_diff_density_rms    0.068 

#===END
